# Supplementary material for: Identical sequences found in distant genomes reveal frequent horizontal transfer across the bacterial domain
Source: eLife. 2021 Jun 14;10:e62719. doi: 10.7554/eLife.62719 (PMC8270642; doi:10.7554/eLife.62719)
Supplement: Figure 2—source data 1. [file elife-62719-fig2-data1.txt]

z_1	z_2
336.528038924137	8.28590388434782e-18
423.663699982853	3.69597939733914e-18
533.360997963154	2.32467182901245e-18
671.461713995711	1.28404167441927e-18
845.320214796068	8.16497115274225e-19
1064.19509951007	3.41036501049275e-19
1339.74225388006	1.80819693355518e-19
1686.63556866399	2.12915827865053e-19
2123.34837782701	1.28449222426122e-19
2673.13723093834	3.29900386374721e-20
3365.28038924137	3.85935079179502e-20
4236.63699982853	1.59780841194411e-20
5333.60997963154	9.93091890319676e-21
6714.61713995711	5.97792689933219e-21
8453.20214796068	1.61432405308455e-21
10641.9509951007	1.00542813086529e-21
13397.4225388005	4.53749931721451e-22
16866.3556866399	2.3939068371574e-22
21233.4837782701	1.31726121587821e-22
26731.3723093834	6.32271874902372e-23
33652.8038924137	2.44849447312193e-23
42366.3699982853	2.14744514627253e-23
53336.0997963154	1.18920495624505e-23
67146.1713995712	7.75016159385418e-24
84532.0214796069	4.54023192325596e-24
106419.509951008	3.05151078911901e-24
133974.225388006	3.61620281245355e-24
168663.5568664	8.87422384895391e-25
212334.837782701	1.10774625856833e-24
267313.723093835	7.33103373151664e-25
336528.038924138	4.84233652784248e-26
423663.699982854	7.41863307464115e-27
533360.997963155	9.72564476700422e-27
671461.713995713	4.43583311609294e-26
845320.21479607	1.4949190818993e-27
1064195.09951008	2.02996697413996e-30
1339742.25388006	4.58554569520401e-31
1686635.568664	9.34597258928566e-31
