# Supplementary material for: Identical sequences found in distant genomes reveal frequent horizontal transfer across the bacterial domain
Source: eLife. 2021 Jun 14;10:e62719. doi: 10.7554/eLife.62719 (PMC8270642; doi:10.7554/eLife.62719)
Supplement: Figure 5—source data 2. [file elife-62719-fig5-data2.txt]

z_1	z_2
336.605536290589	1.38318381544066e-18
423.761263386827	6.28828061617844e-19
533.483823011677	4.4056718285356e-19
671.616341570502	2.97535038464579e-19
845.514879379336	3.42202254668002e-19
1064.44016770073	1.19472463387138e-19
1340.05077645289	3.51576329021992e-19
1687.02397557105	3.1299447198224e-20
2123.83735315241	1.52631131257316e-20
2673.75281440124	8.52713463039379e-21
3366.05536290589	3.70444022878486e-21
4237.61263386827	2.42215250277257e-21
5334.83823011677	8.56283135458572e-22
6716.16341570503	6.24205900998804e-22
8455.14879379337	2.24516679564989e-22
10644.4016770073	7.22785820055275e-23
13400.5077645289	6.82637097197978e-23
16870.2397557105	9.58944031991884e-24
21238.3735315242	1.12136358192671e-24
26737.5281440124	1.27218888301254e-25
