# Supplementary material for: Identical sequences found in distant genomes reveal frequent horizontal transfer across the bacterial domain
Source: eLife. 2021 Jun 14;10:e62719. doi: 10.7554/eLife.62719 (PMC8270642; doi:10.7554/eLife.62719)
Supplement: Supplementary file 6. [file elife-62719-supp6.xlsx]

## Sheet: SEED_Level_1
Subsystems	Number of hits in exact matches (from 276,546 matches)	Number of hits in control sample (from 553,092 control matches)	Enrichment	Enrichment error ci95	p value
Experimental Subsystems	219	32	13.6887	4.27205	2.52782e-70
Dormancy and Sporulation	15	6	4.99987	3.16665	0.00060499
Phages, Prophages, Transposable elements, Plasmids	11528	5059	4.55739	0.14998	0
Virulence, Disease and Defense	13193	7707	3.42364	0.0963298	0
Miscellaneous	1227	1047	2.34386	0.187566	3.16709e-90
Iron acquisition and metabolism	3283	4996	1.3142	0.057249	4.91371e-33
Protein Metabolism	6179	10067	1.22755	0.0388337	1.46637e-35
Clustering-based subsystems	8925	18033	0.989852	0.0253083	0.442462
Photosynthesis	61	140	0.871436	0.237225	0.410526
Respiration	3341	8068	0.828228	0.033179	3.32601e-20
DNA Metabolism	3244	8031	0.807893	0.0327303	5.10225e-25
Regulation and Cell signaling	2683	7742	0.693103	0.0301889	1.03938e-62
Potassium metabolism	663	2209	0.600272	0.0508225	3.94275e-33
Membrane Transport	3455	11536	0.598995	0.0226696	1.35801e-164
Cofactors, Vitamins, Prosthetic Groups, Pigments	1191	4248	0.560735	0.0354161	2.85756e-76
Fatty Acids, Lipids, and Isoprenoids	600	2527	0.474872	0.0412117	5.79396e-69
Cell Wall and Capsule	2766	12058	0.458783	0.0188138	0
RNA Metabolism	1889	8322	0.453978	0.0224356	1.2323e-242
Metabolism of Aromatic Compounds	886	4586	0.386395	0.0272455	6.39166e-179
Carbohydrates	4723	24568	0.384486	0.0119658	0
Phosphorus Metabolism	355	1884	0.376859	0.0413878	1.14346e-77
Amino Acids and Derivatives	2549	14920	0.34169	0.0142641	0
Nucleosides and Nucleotides	687	4105	0.334715	0.0264704	1.97825e-196
Secondary Metabolism	99	592	0.33446	0.0669325	8.62926e-30
Cell Division and Cell Cycle	90	568	0.316902	0.0660925	1.29124e-30
Sulfur Metabolism	261	1694	0.308147	0.0386885	7.58961e-91
Stress Response	990	6767	0.292597	0.0191934	0
Motility and Chemotaxis	354	2580	0.274429	0.0295794	1.82338e-155
Nitrogen Metabolism	200	1850	0.216191	0.0302627	2.92216e-138

## Sheet: SEED_Level_2
Subsystems	Number of hits in exact matches (from 276,546 matches)	Number of hits in control sample (from 553,092 control matches)	Enrichment	Enrichment error ci95	p value
Transposable elements	5224	480	21.7669	1.95298	0
Light-harvesting complexes	10	1	20.0003	17.1551	0.000129851
Drug resistance or antibiotic biosynthesis related cluster	179	23	15.566	5.51411	4.30321e-60
Electron transport and photophosphorylation	14	2	14.0011	10.7858	1.19199e-05
Phages, Prophages, Transposable elements	219	32	13.6887	4.27205	2.52782e-70
Spore DNA protection	15	6	4.99987	3.16665	0.00060499
Resistance to antibiotics and toxic compounds	12991	6497	3.99905	0.118938	0
Protein processing and modification	991	750	2.64267	0.241847	7.72432e-90
Phages, Prophages	3991	3830	2.08412	0.0913999	5.71416e-225
Programmed Cell Death and Toxin-antitoxin Systems	108	107	2.01875	0.488111	3.26258e-07
Coenzyme M	2	2	2.00006	1.8551	0.604938
Peptidase C-14 or homohentisate metabolism related cluster in Rhodopseudomonas	5	5	2.00006	1.53978	0.317176
Siderophores	2864	3135	1.8272	0.0913419	1.44147e-116
Polysaccharides	240	271	1.77128	0.288882	1.83004e-10
Electron accepting reactions	1893	2222	1.70392	0.102412	4.01197e-63
Probably organic hydroperoxide resistance related hypothetical protein	3	4	1.50004	1.28032	0.692729
Protein and nucleoprotein secretion system, Type IV	869	1231	1.41191	0.119093	1.77826e-14
proteosome related	7	10	1.40005	0.947778	0.607461
Protein biosynthesis	4068	5858	1.38892	0.0551557	3.12367e-56
Pathogenicity islands	373	561	1.32972	0.166393	2.5756e-05
Ribosomal Protein L28P relates to a set of uncharacterized proteins	5	9	1.11111	0.818588	1
Isoprenoid/cell wall biosynthesis: PREDICTED UNDECAPRENYL DIPHOSPHATE PHOSPHATASE	6	11	1.09091	0.759636	1
Plasmid related functions	6	11	1.09091	0.759636	1
Biologically active compounds in metazoan cell defence and differentiation	63	123	1.02441	0.280632	0.876572
DNA repair	1789	3522	1.01591	0.0569127	0.589063
Hypothetical aromatic compound degradation cluster	1	2	1	0.983045	1
Two related proteases	20	43	0.930234	0.411855	0.893867
Sodium Ion-Coupled Energetics	79	171	0.923978	0.225468	0.591811
Putative asociate of RNA polymerase sigma-54 factor rpoN	162	357	0.907566	0.158541	0.328049
Tricarboxilate (malonate, propionate?) transport	112	256	0.875007	0.180629	0.245921
Capsular and extracellular polysacchrides	1345	3104	0.866632	0.0544611	1.06956e-05
Chemotaxis, response regulators	3	7	0.857153	0.714151	1
Nucleotidyl-phosphate metabolic cluster	16	41	0.780518	0.371668	0.482729
Protein degradation	647	1672	0.773896	0.0682698	2.03181e-08
Tetrapyrroles	726	1931	0.751923	0.062529	2.98809e-11
Phospholipids	197	541	0.728272	0.112804	0.000107764
Riboflavin, FMN, FAD	156	464	0.672414	0.115226	1.0921e-05
DNA replication	1018	3045	0.668637	0.0464995	2.99709e-30
May be related to ADP-phosphoribose and NAD-dependent acetylation	227	719	0.631433	0.0899529	4.56994e-10
Isoprenoids	203	678	0.598821	0.0894781	3.04096e-11
Electron donating reactions	1111	3790	0.58628	0.0385193	7.66252e-60
General secretion system/Phosphate-binding DING proteins cluster	10	35	0.571429	0.319074	0.153483
Protein folding	327	1166	0.560892	0.066318	3.94858e-22
Lipoic acid	55	197	0.558376	0.152088	7.44946e-05
Central carbohydrate metabolism	984	3850	0.511169	0.0351008	3.3654e-88
Protein translocation across cytoplasmic membrane	192	752	0.510639	0.0771658	1.32539e-18
Alanine, serine, and glycine	151	599	0.504174	0.0852538	1.64833e-15
Cold shock	39	160	0.487501	0.153195	2.23535e-05
Cell wall of Mycobacteria	282	1163	0.484953	0.0607012	2.77566e-31
Selenoproteins	146	621	0.47021	0.0803105	1.68175e-18
Fermentation	117	505	0.463367	0.0877289	9.75322e-16
Bacteriocins, ribosomally synthesized antibacterial peptides	92	398	0.462312	0.0978965	8.44613e-13
Biosynthesis of galactoglycans and related lipopolysacharides	15	66	0.454546	0.213615	0.00437628
Histidine Metabolism	115	511	0.450099	0.0857012	9.53528e-17
Tartronate-semialdehyde related area (links to pyridoxine and aldorate metabolism)	48	216	0.444445	0.126403	4.67128e-08
Gram-Positive cell wall components	92	417	0.441248	0.0931238	2.01249e-14
Pyrimidines	399	1849	0.431585	0.0452669	2.84797e-61
Methylamine utilization	14	65	0.43077	0.207528	0.00266345
Transcription	489	2271	0.430648	0.040913	4.77163e-75
ABC transporters	519	2416	0.429636	0.0396509	4.5335e-80
Lysine, threonine, methionine, and cysteine	940	4390	0.428247	0.0295886	1.84373e-144
Peripheral pathways for catabolism of aromatic compounds	591	2799	0.422294	0.0365814	2.73179e-95
Putative GGDEF domain protein related to agglutinin secretion	13	62	0.419356	0.207817	0.00300506
Phage family-specific subsystems	34	163	0.417179	0.137767	6.75761e-07
Quinone cofactors	51	245	0.416327	0.114691	6.81598e-10
metabolism of linear and branched-chain alkanes, nitroalkanes and may be cyclic ketones, alkenoic acids	13	63	0.412699	0.204356	0.00216648
Acid stress	31	158	0.392406	0.134468	2.5133e-07
Periplasmic Stress	49	251	0.390439	0.109039	4.82468e-11
Aromatic amino acids and derivatives	445	2311	0.385116	0.0379535	8.20114e-92
Cell Division	133	707	0.376239	0.0660264	2.72171e-30
Cytochrome biogenesis	69	382	0.361258	0.0858787	6.51468e-18
Glutamine, glutamate, aspartate, asparagine; ammonia assimilation	122	692	0.352602	0.0641921	2.69214e-32
RNA processing and modification	1043	5959	0.35006	0.0226558	2.90786e-267
Plant Hormones	6	35	0.342858	0.224983	0.0118987
Fatty acid metabolic cluster	8	47	0.340426	0.201499	0.00239848
Oxidative stress	475	2800	0.339287	0.0321493	1.82342e-132
NAD and NADP	90	533	0.337712	0.0706999	1.24091e-26
Metabolism of central aromatic intermediates	220	1320	0.333334	0.045693	6.4236e-65
Protein secretion system, Type II	149	903	0.330012	0.0544165	1.74187e-45
One-carbon Metabolism	165	1006	0.328033	0.051513	7.42936e-51
Branched-chain amino acids	233	1439	0.323837	0.0430948	3.82791e-73
Folate and pterines	100	626	0.31949	0.0634626	3.68537e-33
Fatty acids	117	771	0.303503	0.0558321	6.28912e-43
heat shock, cell division, proteases, and a methyltransferase	3	20	0.300001	0.242909	0.0451097
Monosaccharides	704	4721	0.298243	0.0231385	1.13279e-258
Sugar Phosphotransferase Systems, PTS	17	115	0.295654	0.12915	1.35076e-07
Di- and oligosaccharides	626	4313	0.290286	0.0238042	1.38089e-243
Proline and 4-hydroxyproline	164	1165	0.281553	0.0439621	1.65713e-69
Purines	236	1693	0.278804	0.03655	4.48165e-101
Flagellar motility in Prokaryota	345	2506	0.275349	0.030028	1.09428e-150
Triacylglycerols	32	242	0.26448	0.0875572	1.54742e-16
Detoxification	134	1015	0.264056	0.0452195	9.45892e-65
Osmotic stress	164	1255	0.261372	0.0406501	2.96737e-80
Hypothetical in Lysine biosynthetic cluster	21	163	0.257689	0.102391	1.01923e-11
Aminosugars	151	1197	0.252319	0.0407303	2.70809e-79
CO2 fixation	47	377	0.24936	0.069296	2.63586e-26
Sugar alcohols	198	1610	0.245987	0.0348754	2.09442e-108
Social motility and nonflagellar swimming in bacteria	9	74	0.243269	0.136233	3.43796e-06
TldD cluster	19	166	0.228886	0.094473	3.51508e-13
Heat shock	31	275	0.225426	0.0751818	4.75314e-21
DNA polymerase III epsilon cluster	12	107	0.224271	0.111893	6.95325e-09
CRISPs	32	286	0.223749	0.0735739	4.44858e-22
Tricarboxylate transporter	22	199	0.221079	0.085599	7.17966e-16
Anaerobic degradation of aromatic compounds	6	55	0.218156	0.141404	3.10867e-05
Carbohydrates	49	459	0.213484	0.0578219	7.25834e-36
Organic acids	105	1008	0.208311	0.0395682	2.95157e-78
Pyruvate kinase associated cluster	9	89	0.202227	0.112685	3.60439e-08
Gram-Negative cell wall components	443	4428	0.200069	0.0190215	0
DNA pol III alpha and a number of apparently unrelated functions	3	32	0.187484	0.150745	0.00100835
Arginine; urea cycle, polyamines	358	3832	0.186831	0.0196576	3.08729232401994e-315
Chromosome Replication	9	97	0.185551	0.10317	2.75229e-09
Biosynthesis of phenylpropanoids	17	195	0.174346	0.0748129	4.31345e-18
Degradation of Polyphenols (?)	1	12	0.166656	0.162753	0.0731893
Denitrification	5	62	0.16128	0.11068	8.06978e-07
Organic sulfur assimilation	98	1227	0.159729	0.0310491	1.01407e-112
alpha-proteobacterial cluster of hypotheticals	1	14	0.142851	0.139468	0.0279148
Quorum sensing and biofilm formation	75	1055	0.142174	0.031213	1.70948e-103
Uni- Sym- and Antiporters	13	189	0.13756	0.0656498	5.41143e-20
Clustering-based subsystems	34	526	0.129273	0.040697	9.34027e-55
Toxins and superantigens	3	48	0.124996	0.100092	4.25971e-06
Permease proteins, subunit of DNA pol, and the Val-tRNA synthetase	8	128	0.124996	0.0721394	1.71845e-14
Invasion and intracellular resistance	13	210	0.123806	0.0589664	5.86523e-23
Bacterial cytostatics, differentiation factors and antibiotics	10	162	0.123453	0.0653624	3.91136e-18
Protein secretion system, Type III	35	601	0.116469	0.0361051	3.75048e-65
Prophage	23	400	0.114997	0.0429568	4.13973e-44
Regulation of virulence	9	161	0.111798	0.0616144	9.63158e-19
a carboxypeptidase, a reductase, and a step from lysibe biosynthesis	3	54	0.111108	0.0889129	6.53744e-07
TRAP transporters	4	79	0.101264	0.0743308	5.30997e-10
DNA uptake, competence	13	283	0.0918715	0.0435509	3.25972e-34
Plant-Prokaryote DOE project	1	25	0.0799992	0.0780466	0.000566754
hypthetical clustered with tRNA modification	1	27	0.0740735	0.0722601	0.000373102
Translation	4	128	0.0624997	0.0457323	7.98076e-18
Hypothetical lipase related to Phosphatidate metabolism	1	46	0.0434782	0.0423963	1.82596e-07
A bicyclomycin resistance protein, a helicase, and a pseudouridine synthase	2	97	0.0412371	0.0362967	5.99714e-15
May be related to amine metabolism	4	199	0.040201	0.0293328	1.43672e-29
Protein secretion system, Type VIII (Extracellular nucleation/precipitation pathway, ENP)	2	100	0.04	0.0352038	2.13778e-15
Pyridoxine	3	157	0.0382166	0.030405	1.08941e-23
Protein secretion system, Type VII (Chaperone/Usher pathway, CU)	9	593	0.0303542	0.016542	1.21163e-89
Adhesion	5	336	0.0297619	0.0201666	1.4943e-51
Cation transporters	4	296	0.0270271	0.0197098	6.52411e-46
Protein secretion system, Type VI	3	373	0.0160858	0.0128096	9.7148e-61
Protein secretion system, Type V	4	580	0.0137786	0.0100431	9.1976e-95

## Sheet: SEED_Level_3
Subsystems	Number of hits in exact matches (from 276,546 matches)	Number of hits in control sample (from 553,092 control matches)	Enrichment	Enrichment error ci95	p value
Tetracycline resistance, ribosome protection type	425	1	846.027	693.615	5.91266e-201
Integrons	1900	7	538.867	276.303	0
Translation elongation factor G family	2451	18	272.864	101.256	0
CBSS-36873.1.peg.4752	811	12	135.109	58.2467	0
Erythromycin resistance	277	5	110.732	63.8768	1.43557e-123
Aminoglycoside adenylyltransferases	1405	35	80.1926	22.8412	0
Mercury resistance operon	3779	152	49.728	7.40437	0
Capsular surface virulence antigen loci	822	44	37.3636	9.78226	0
Streptothricin resistance	159	9	35.3333	17.1897	8.93656e-64
CBSS-316273.3.peg.2709	3286	198	33.1919	4.46667	0
CBSS-203122.12.peg.188	4664	359	25.9834	2.64756	0
Phage functions that need a home	219	22	19.9094	7.09271	4.03444e-78
CBSS-267608.1.peg.2815	302	33	18.3035	5.55104	7.00592e-105
CBSS-1085.1.peg.1363	179	23	15.566	5.51411	4.30321e-60
USS-DB-6	368	50	14.7209	3.79217	9.0473e-120
Cadmium resistance	65	9	14.4454	7.28701	3.00671e-22
Inteins	27	5	10.8023	6.70261	3.81349e-09
Photosystem II	5	1	10.0017	8.88273	0.0178332
Tn552	560	121	9.25618	1.66511	4.54859e-152
Signal peptidase	771	173	8.91326	1.36472	5.90097e-205
Conjugative transfer related cluster	71	16	8.87496	3.76738	2.71168e-20
Arsenic resistance	694	164	8.46338	1.33389	3.8291e-180
CBSS-315749.4.peg.3658	441	108	8.16663	1.56399	3.59909e-113
CBSS-336982.3.peg.1011	4	1	7.99996	7.2083	0.0452684
Chloroaromatic degradation pathway	8	2	7.99996	6.40348	0.00340419
Small acid-soluble spore proteins	8	2	7.99996	6.40348	0.00340419
Group II intron-associated genes	357	92	7.76082	1.60593	1.36043e-89
Isobutyryl-CoA to Propionyl-CoA Module	15	4	7.49995	5.11077	6.06634e-05
Streptococcus pneumoniae Vancomycin Tolerance Locus	110	30	7.33328	2.47374	6.39523e-28
Siderophore Yersiniabactin Biosynthesis	2523	708	7.12706	0.572636	0
Resistance to Vancomycin	56	16	6.99994	3.04124	1.3941e-14
Resistance to chromium compounds	144	47	6.12758	1.74775	1.65248e-32
F plasmid replication	6	2	5.99992	4.92703	0.0196624
Phage integration and excision	2294	802	5.7206	0.444512	0
Glycolysis and Gluconeogenesis, including Archaeal enzymes	50	19	5.26304	2.21427	6.06641e-11
CBSS-316273.3.peg.2378	42	16	5.24988	2.35934	1.42416e-09
Butanol Biosynthesis	18	7	5.14273	3.09319	0.000127867
pVir Plasmid of Campylobacter	733	300	4.88652	0.619878	3.10524e-134
MazEF toxin-antitoxing (programmed cell death) system	90	37	4.86472	1.58121	8.3586e-18
DNA topoisomerases, Type I, ATP-independent	413	173	4.77442	0.786249	5.72033e-75
Luciferases	9	4	4.49983	3.24391	0.0139612
Two-component Response Regulator of Virulence ResDE	9	4	4.49983	3.24391	0.0139612
Terminal cytochrome C oxidases	1385	633	4.37596	0.396053	1.01883e-228
Cobalt-zinc-cadmium resistance	2818	1304	4.32206	0.276785	0
Copper homeostasis	1495	696	4.29595	0.372154	1.44365e-242
Legionaminic Acid Biosynthesis	23	11	4.18179	2.22352	6.36642e-05
CBSS-436114.3.peg.833	2	1	3.99999	3.79176	0.259261
Neotrehalosadiamine (NTD) Biosynthesis Operon	2	1	3.99999	3.79176	0.259261
Periplasmic-Binding-Protein-Dependent Transport System for &#945;-Glucosides	4	2	3.99999	3.42671	0.100139
CBSS-1806.1.peg.3045	8	4	3.99997	2.9284	0.0264658
Erythritol utilization	31	16	3.87494	1.81927	6.45584e-06
Glutathione-dependent pathway of formaldehyde detoxification	54	29	3.72388	1.39414	6.01195e-09
Carbonate Biomineralization	1161	659	3.52352	0.32444	2.03483e-154
Dipicolinate Synthesis	7	4	3.49999	2.61023	0.0501903
Cellulosome	214	129	3.31782	0.663754	5.95039e-28
ECF class transporters	227	139	3.26618	0.633309	5.42117e-29
Phage tail fiber proteins	1085	690	3.14492	0.289358	5.70226e-126
Cyanobacterial Circadian Clock	20	13	3.07692	1.62036	0.00142988
Phage Family Inoviridae	53	35	3.02857	1.0889	3.17004e-07
Chlorophyll Biosynthesis	6	4	3	2.28859	0.0939058
Proteasome archaeal	6	4	3	2.28859	0.0939058
Restriction-Modification System	100	69	2.89855	0.787017	7.10169e-12
Biphenyl Degradation	23	16	2.875	1.42078	0.00107853
Branched-Chain Amino Acid Biosynthesis	7	5	2.8	2.03502	0.120397
VC0266	15	11	2.72728	1.55682	0.0117065
Flagellar motility	105	78	2.69231	0.702921	3.01861e-11
Glycine reductase, sarcosine reductase and betaine reductase	140	110	2.54546	0.576767	2.47798e-13
Alpha-Amylase locus in Streptocococcus	5	4	2.50001	1.96192	0.170859
DNA phosphorothioation	10	8	2.50001	1.61166	0.075994
Mannose Metabolism	188	154	2.44157	0.479081	2.90757e-16
Zinc resistance	109	94	2.31917	0.575358	3.63919e-09
CBSS-1352.1.peg.856	97	85	2.28238	0.59434	3.67959e-08
Ethylmalonyl-CoA pathway of C2 assimilation, GJO	11	10	2.20003	1.35183	0.101882
CBSS-56780.10.peg.1536	12	11	2.18185	1.30053	0.0745238
DNA repair, bacterial UvrD and related helicases	397	382	2.07858	0.27716	4.72987e-24
CBSS-101031.3.peg.1876	1	1	2.00006	1.97458	1
Galactose-inducible PTS	1	1	2.00006	1.97458	1
RNA processing orphans	1	1	2.00006	1.97458	1
Toluene 4-monooxygenase (T4MO)	1	1	2.00006	1.97458	1
CBSS-292415.3.peg.2341	2	2	2.00006	1.8551	0.604938
coenzyme M biosynthesis	2	2	2.00006	1.8551	0.604938
CBSS-316056.14.peg.880	5	5	2.00006	1.53978	0.317176
Conenzyme B12 related Hypothetical: Clusters with cobST	11	11	2.00006	1.21373	0.113793
ABC transporter alkylphosphonate (TC 3.A.1.9.1)	177	183	1.93449	0.370254	7.60577e-10
DNA repair, UvrABC system	217	243	1.78607	0.305877	8.98737e-10
DNA-binding regulatory proteins, strays	631	719	1.75527	0.18068	2.48236e-24
CO Dehydrogenase	20	23	1.73918	0.83323	0.0753203
CBSS-257314.1.peg.752	62	73	1.69868	0.507729	0.00249215
Citrate Utilization System (CitAB, CitH, and tctABC)	5	6	1.66671	1.26435	0.523106
Streptococcus agalactiae virulome	43	52	1.65389	0.576023	0.0163755
CBSS-269482.4.peg.5018	27	33	1.6364	0.689957	0.073849
CBSS-269801.1.peg.1715	4	5	1.60004	1.28254	0.49276
cAMP signaling in bacteria	1199	1514	1.58392	0.116993	1.04614e-31
CBSS-316057.3.peg.880	17	22	1.54549	0.774986	0.177541
CBSS-349102.4.peg.3442	657	869	1.51212	0.147982	3.24019e-15
CBSS-269482.1.peg.1294	3	4	1.50004	1.28032	0.692729
CRISPR-associated cluster	3	4	1.50004	1.28032	0.692729
Coenzyme B12 biosynthesis	550	745	1.47655	0.156679	8.24224e-12
beta-glucuronide utilization	88	121	1.45459	0.362141	0.00817941
Cluster-based Subsystem Grouping Hypotheticals - perhaps Proteosome Related	7	10	1.40005	0.947778	0.607461
MexE-MexF-OprN Multidrug Efflux System	51	75	1.36005	0.426368	0.0897957
Staphylococcal pathogenicity islands SaPI	362	534	1.35586	0.172805	1.06205e-05
ABC-type iron transport system	23	34	1.35299	0.592057	0.263484
Hemin transport system	103	153	1.34646	0.308073	0.0203405
Lacto-N-Biose I and Galacto-N-Biose Metabolic Pathway	4	6	1.33328	1.05654	0.739876
eukaryotic rRNA modification and related functions	2	3	1.33328	1.22189	1
carbazol degradation cluster	21	32	1.31245	0.593139	0.381826
Phage baseplate proteins	9	14	1.28567	0.7948	0.658673
Mercuric reductase	37	58	1.27582	0.454745	0.276198
Naphtalene and antracene degradation	12	19	1.26312	0.703956	0.568769
SigmaB stress responce regulation	65	104	1.24997	0.34755	0.165492
CBSS-211586.1.peg.2832	35	56	1.24997	0.454816	0.317287
Tocopherol Biosynthesis	24	39	1.23074	0.522735	0.424781
Carbon monoxide dehydrogenase maturation factors	11	18	1.2222	0.700555	0.693965
DNA repair, bacterial	818	1341	1.21996	0.103084	9.12977e-06
Peptide methionine sulfoxide reductase	14	23	1.21737	0.638148	0.601789
Ribosome SSU bacterial	111	183	1.21309	0.263627	0.1081
Fermentations: Mixed acid	86	142	1.21125	0.295603	0.160573
CBSS-349161.4.peg.2427	6	10	1.19998	0.841541	0.792185
CBSS-316273.3.peg.922	3	5	1.19998	1.01363	1
Terminal cytochrome oxidases	438	733	1.19507	0.135927	0.00353335
Multidrug Resistance Efflux Pumps	555	934	1.18842	0.120544	0.00141034
A Gram-positive cluster that relates ribosomal protein L28P to a set of uncharacterized proteins	5	9	1.11111	0.818588	1
Ton and Tol transport systems	1252	2259	1.10845	0.0749189	0.00366158
Type I Restriction-Modification	187	340	1.1	0.184784	0.309219
Listeria Pathogenicity Island LIPI-1 extended	11	20	1.1	0.623948	0.849411
Conserved gene cluster associated with Met-tRNA formyltransferase	78	143	1.09091	0.273914	0.568122
CBSS-83331.1.peg.3039	6	11	1.09091	0.759636	1
Proteolysis in bacteria, ATP-dependent	480	881	1.08967	0.116795	0.134568
Heme biosynthesis orphans	19	35	1.08571	0.499003	0.774001
Bacitracin Stress Response	41	76	1.07895	0.359597	0.695584
N-linked Glycosylation in Bacteria	102	190	1.07368	0.238056	0.576465
Carbon monoxide induced hydrogenase	15	28	1.07143	0.539538	0.871807
Campylobacter Iron Metabolism	65	123	1.05691	0.28675	0.757013
Nonmevalonate Branch of Isoprenoid Biosynthesis	43	82	1.04878	0.341125	0.849552
Steroid sulfates	63	123	1.02441	0.280632	0.876572
Pentose phosphate pathway	101	198	1.02021	0.22558	0.902357
CBSS-296591.1.peg.2330	57	112	1.01787	0.291322	0.935007
Benzoate degradation	61	121	1.00827	0.279615	1
Polyprenyl Diphosphate Biosynthesis	76	151	1.00662	0.252851	1
Acid resistance mechanisms	1	2	1	0.983045	1
CBSS-235.1.peg.567	24	48	1	0.414182	1
CBSS-392499.4.peg.4257	1	2	1	0.983045	1
High affinity phosphate transporter and control of PHO regulon	1	2	1	0.983045	1
DNA repair, bacterial MutL-MutS system	121	245	0.98775	0.2	0.955789
C jejuni colonization of chick caeca	40	81	0.987649	0.328945	1
Hydrogenases	82	168	0.97617	0.235894	0.89338
BlaR1 Family Regulatory Sensor-transducer Disambiguation	36	74	0.972947	0.338501	1
Toxin-antitoxin replicon stabilization systems	17	35	0.971399	0.46106	1
Methionine Salvage	40	84	0.952381	0.315791	0.849251
Glutathione-regulated potassium-efflux system and associated functions	305	643	0.948679	0.123649	0.469184
Multidrug efflux pump in Campylobacter jejuni (CmeABC operon)	361	763	0.946265	0.113753	0.392877
Succinate dehydrogenase	165	350	0.942858	0.16414	0.543745
Fructooligosaccharides(FOS) and Raffinose Utilization	66	140	0.942858	0.250202	0.712491
CBSS-257314.1.peg.676	20	43	0.930234	0.411855	0.893867
Na+ translocating decarboxylases and related biotin-dependent enzymes	79	171	0.923978	0.225468	0.591811
Teichuronic acid biosynthesis	6	13	0.923079	0.635378	1
Bacteriophage P4 cluster	97	211	0.919433	0.204138	0.506806
Ubiquinone Menaquinone-cytochrome c reductase complexes	27	59	0.915257	0.357342	0.733226
Periplasmic disulfide interchange	133	293	0.907853	0.173913	0.382213
CBSS-316057.3.peg.1308	162	357	0.907566	0.158541	0.328049
Dehydrogenase complexes	110	243	0.905353	0.189298	0.39762
Methylglyoxal Metabolism	132	293	0.901027	0.173024	0.328645
O-Methyl Phosphoramidate Capsule Modification in Campylobacter	38	85	0.894122	0.300884	0.632705
CBSS-36873.1.peg.6699	48	108	0.888894	0.269842	0.552329
CBSS-176279.3.peg.868	4	9	0.888894	0.688865	1
Vibrioferrin synthesis	4	9	0.888894	0.688865	1
Iron(III) dicitrate transport system Fec	73	165	0.884854	0.222554	0.40964
T4-like phages core proteins	330	746	0.884724	0.109966	0.0651377
Spore Coat	19	43	0.883727	0.397386	0.688838
CBSS-314288.3.peg.1460	112	256	0.875007	0.180629	0.245921
CBSS-323850.3.peg.3142	3	7	0.857153	0.714151	1
Proteasome bacterial	16	38	0.842118	0.403758	0.665481
Two-component regulatory systems in Campylobacter	166	396	0.838398	0.14326	0.0600317
KH domain RNA binding protein YlqC	23	55	0.836378	0.34586	0.548475
Exopolysaccharide Biosynthesis	67	163	0.822104	0.213078	0.184323
Translation initiation factors bacterial	72	176	0.818201	0.205125	0.157529
HPr catabolite repression system	9	22	0.818201	0.486588	0.705667
Lactose utilization	78	194	0.804147	0.193998	0.107949
Salicylate ester degradation	6	15	0.800024	0.545721	0.817869
Thioredoxin-disulfide reductase	153	387	0.790725	0.139378	0.0136364
L-rhamnose utilization	167	423	0.789626	0.133564	0.00989321
CBSS-222523.1.peg.1311	16	41	0.780518	0.371668	0.482729
DNA repair, bacterial UmuCD system	55	141	0.780172	0.21966	0.129533
CBSS-160492.1.peg.550	57	147	0.775481	0.214633	0.118516
Phage cyanophage	293	761	0.770013	0.0994128	0.000128316
Fatty Acid Biosynthesis FASII	77	200	0.769973	0.185864	0.0556294
Ribosomal protein S12p Asp methylthiotransferase	36	95	0.757873	0.256379	0.16518
riboflavin to FAD	102	273	0.747235	0.157983	0.0116641
Cluster co-expressed with butyrate metabolism cluster	20	54	0.740726	0.320754	0.269397
Carotenoids	7	19	0.736829	0.475074	0.540808
Queuosine-Archaeosine Biosynthesis	284	771	0.736693	0.0960206	7.38497e-06
Tryptophan synthesis	273	745	0.732875	0.0972834	8.03059e-06
Glycerolipid and Glycerophospholipid Metabolism in Bacteria	197	541	0.728272	0.112804	0.000107764
Universal GTPases	427	1179	0.724336	0.0774689	6.13265e-09
Aromatic amino acid interconversions with aryl acids	32	89	0.719096	0.254694	0.122604
Lipoprotein Biosynthesis	28	78	0.717944	0.269241	0.149049
GroEL GroES	15	42	0.714283	0.346347	0.325266
Respiratory Complex I	361	1011	0.714142	0.0827042	2.14636e-08
Propanediol utilization	68	191	0.71204	0.180323	0.0174382
Creatine and Creatinine Degradation	21	59	0.711863	0.301044	0.19352
Translation elongation factors bacterial	43	122	0.704918	0.219005	0.0476797
Trehalose Biosynthesis	160	457	0.700219	0.119098	8.20432e-05
Phage packaging machinery	56	160	0.7	0.193197	0.0208277
Macromolecular synthesis operon	8	23	0.695653	0.426622	0.448983
tRNA aminoacylation, Asp and Asn	98	282	0.695036	0.148507	0.00157834
Glycine cleavage system	11	32	0.6875	0.374859	0.333357
tRNA aminoacylation, Leu	61	178	0.685394	0.18162	0.0109524
ATP-dependent efflux pump transporter Ybh	85	253	0.671937	0.15273	0.00121114
Bacillibactin Siderophore	5	15	0.666667	0.477113	0.487759
Gram Positive Competence	5	15	0.666667	0.477113	0.487759
Multidrug Resistance, 2-protein version Found in Gram-positive bacteria	3	9	0.666667	0.550554	0.761552
Methanogenesis strays	1	3	0.666667	0.653963	1
Biogenesis of c-type cytochromes	90	272	0.661765	0.146285	0.000530987
Siderophore assembly kit	248	750	0.661334	0.090798	6.81319e-09
tRNA aminoacylation, Thr	45	137	0.656935	0.198662	0.0145502
Vibrio Polysaccharide (VPS) Biosynthesis	82	250	0.656	0.151223	0.000714461
tRNA aminoacylation, Glu and Gln	129	394	0.654823	0.122328	1.87299e-05
Pyrroloquinoline Quinone biosynthesis	17	52	0.653847	0.299389	0.159348
The Chv regulatory system of Alphaproteobacteria	14	43	0.651163	0.322155	0.205375
tRNA aminoacylation, His	34	105	0.647619	0.221255	0.0303786
Colicin V and Bacteriocin Production Cluster	42	130	0.646154	0.201141	0.0121641
Chitin and N-acetylglucosamine utilization	116	360	0.644445	0.126294	2.71724e-05
Glutathione: Biosynthesis and gamma-glutamyl cycle	54	168	0.642858	0.178824	0.00429679
Muconate lactonizing enzyme family	8	25	0.64	0.390504	0.355929
Multidrug Resistance, Tripartite Systems Found in Gram Negative Bacteria	148	467	0.633833	0.11063	6.38052e-07
tRNA aminoacylation, Trp	30	95	0.631579	0.22729	0.0287557
CBSS-216591.1.peg.168	227	719	0.631433	0.0899529	4.56994e-10
Alginate metabolism	37	119	0.621849	0.203992	0.0106667
Threonine degradation	166	541	0.613679	0.101118	1.27545e-08
NAD consumption	46	150	0.613334	0.182485	0.00305285
A cluster relating to Tryptophanyl-tRNA synthetase	6	20	0.6	0.402858	0.305528
UDP-N-acetylmuramate from Fructose-6-phosphate Biosynthesis	260	872	0.596331	0.0791733	2.8303e-14
tRNA aminoacylation, Ser	32	108	0.592593	0.206264	0.00905385
CBSS-498211.3.peg.1415	34	115	0.591305	0.200403	0.00683227
Serine Biosynthesis	125	427	0.585481	0.10974	5.16309e-08
Alkylphosphonate utilization	126	434	0.580646	0.108336	2.32526e-08
De Novo Pyrimidine Synthesis	18	62	0.580646	0.257414	0.0433757
CBSS-216592.1.peg.3937	203	704	0.576705	0.0858761	6.4399e-13
Biogenesis of cytochrome c oxidases	49	170	0.576471	0.165835	0.00042891
HtrA and Sec secretion	170	592	0.574325	0.0929587	3.02076e-11
CBSS-350701.3.peg.3277	10	35	0.571429	0.319074	0.153483
Rubrerythrin	10	35	0.571429	0.319074	0.153483
CBSS-393124.3.peg.2657	2	7	0.571429	0.513524	0.726869
Glutathione analogs: mycothiol	2	7	0.571429	0.513524	0.726869
Poly-gamma-glutamate biosynthesis	23	81	0.567902	0.226928	0.0163154
Flavodoxin	54	191	0.565446	0.155439	0.000136724
Respiratory dehydrogenases 1	273	967	0.564633	0.0728399	2.55781e-18
Resistance to fluoroquinolones	172	610	0.563935	0.0906479	3.85473e-12
Protein chaperones	141	501	0.562875	0.0993155	2.7589e-10
ECSIG4-SIG7	31	111	0.558559	0.19616	0.00320514
Lipoic acid metabolism	55	197	0.558376	0.152088	7.44946e-05
Pyruvate metabolism II: acetyl-CoA, acetogenesis from pyruvate	270	973	0.554985	0.0718357	3.09766e-19
Rrf2 family transcriptional regulators	36	131	0.549619	0.180598	0.000983838
Soluble cytochromes and functionally related electron carriers	47	173	0.543353	0.158427	0.000106366
Proteorhodopsin	37	137	0.540147	0.175107	0.000524614
ATP-dependent Nuclease	17	63	0.539683	0.243647	0.0236814
Sugar utilization in Thermotogales	1193	4436	0.537873	0.0338125	4.19035e-89
Transport of Zinc	90	336	0.535715	0.116041	3.21805e-08
tRNA modification yeast mitochondrial	12	45	0.533334	0.276542	0.0498102
IbrA and IbrB: co-activators of prophage gene expression	25	94	0.531915	0.204142	0.0045641
tRNA aminoacylation, Tyr	39	147	0.530613	0.167831	0.000241217
Petrobactin-mediated iron uptake system	5	19	0.526316	0.372731	0.278307
Phage tail proteins 2	125	480	0.520834	0.0965481	6.89089e-12
ABC transporter tungstate (TC 3.A.1.6.2)	7	27	0.518519	0.327908	0.145107
Uracil-DNA glycosylase	36	139	0.517986	0.169381	0.000281046
Bacterial Endolysins: autolysins, phage, and phage-like lysins	12	47	0.510639	0.264093	0.0376774
CBSS-224911.1.peg.435	21	83	0.506025	0.208347	0.00469968
Extracellular matrix proteins (PEL) involved in glucose-rich biofilm formation in Pseudomonas	30	119	0.504202	0.1782	0.000472498
Periplasmic Stress Response	49	195	0.502565	0.142934	6.35208e-06
Sucrose utilization Shewanella	5	20	0.500001	0.353346	0.203739
Nitrilase	1	4	0.500001	0.489844	1
Teichoic and lipoteichoic acids biosynthesis	73	294	0.496599	0.117711	1.72753e-08
Threonine anaerobic catabolism gene cluster	232	936	0.495727	0.0682683	2.54487e-24
Arginine Biosynthesis extended	24	97	0.494846	0.192245	0.00136552
Broadly distributed proteins not in subsystems	48	195	0.492308	0.141086	3.22996e-06
DNA structural proteins, bacterial	50	204	0.490197	0.137897	1.91947e-06
Recycling of Peptidoglycan Amino Acids	116	474	0.489452	0.0934626	2.63637e-13
Oxidative stress	153	626	0.488819	0.0819233	3.31521e-17
tRNA aminoacylation, Pro	61	250	0.488001	0.125362	9.77468e-08
Cold shock, CspA family of proteins	39	160	0.487501	0.153195	2.23535e-05
Tryptophan catabolism	48	197	0.48731	0.13952	2.4567e-06
mycolic acid synthesis	282	1163	0.484953	0.0607012	2.77566e-31
Oxygen and light sensor PpaA-PpsR	6	25	0.480001	0.318964	0.126615
Siderophore Staphylobactin	11	46	0.478262	0.254873	0.0243658
Na(+)-translocating NADH-quinone oxidoreductase and rnf-like group of electron transport complexes	176	739	0.47632	0.0745393	3.37829e-21
Glycolate, glyoxylate interconversions	54	227	0.475772	0.128963	1.73643e-07
CBSS-312309.3.peg.1965	14	59	0.474577	0.229898	0.00901807
Branched chain amino acid degradation regulons	8	34	0.470589	0.282393	0.0503845
Protocatechuate branch of beta-ketoadipate pathway	74	317	0.466878	0.109429	3.37133e-10
Beta-lactamase	35	151	0.463577	0.152251	1.58996e-05
pyrimidine conversions	335	1447	0.463028	0.0531509	2.35686e-42
Calvin-Benson cycle	9	39	0.461539	0.264952	0.032098
Propionyl-CoA to Succinyl-CoA Module	9	39	0.461539	0.264952	0.032098
Pterin metabolism	3	13	0.461539	0.37718	0.292443
Quorum Sensing: Autoinducer-2 Synthesis	19	83	0.457832	0.195304	0.0014845
Potassium homeostasis	356	1559	0.456704	0.0508555	9.00799e-47
CBSS-258594.1.peg.3339	15	66	0.454546	0.213615	0.00437628
Transcription initiation, bacterial sigma factors	152	675	0.450371	0.0752255	1.01105e-21
Histidine transporter and regulator	115	511	0.450099	0.0857012	9.53528e-17
p-Aminobenzoyl-Glutamate Utilization	33	147	0.44898	0.150977	1.13119e-05
Regulation of Oxidative Stress Response	48	214	0.448599	0.127669	8.35087e-08
Pyruvate metabolism I: anaplerotic reactions, PEP	116	518	0.447877	0.0848959	3.59829e-17
CBSS-502800.3.peg.2785	48	216	0.444445	0.126403	4.67128e-08
Marinocine, a broad-spectrum antibacterial protein	2	9	0.444445	0.397714	0.356194
Pyruvate:ferredoxin oxidoreductase	33	149	0.442954	0.148818	6.17276e-06
Glycogen metabolism	21	95	0.442106	0.180456	0.000350552
N-heterocyclic aromatic compound degradation	22	100	0.440001	0.176036	0.000231692
T7-like cyanophage core proteins	34	155	0.43871	0.145372	3.0578e-06
Type 4 conjugative transfer system, IncI1 type	7	32	0.437501	0.274524	0.0420309
Choline and Betaine Uptake and Betaine Biosynthesis	131	599	0.437396	0.0781714	2.23585e-20
RNA modification cluster	26	119	0.436975	0.162712	4.42592e-05
tRNA aminoacylation, Arg	27	124	0.435485	0.159499	2.92933e-05
CBSS-404974.3.peg.999	51	235	0.434043	0.11991	5.7088e-09
CBSS-204773.3.peg.746	11	51	0.431373	0.22867	0.00983166
tRNA-methylthiotransferase containing cluster	136	631	0.431062	0.0755954	5.1817e-22
CBSS-265072.7.peg.546	14	65	0.43077	0.207528	0.00266345
Transcription factors bacterial	191	889	0.429697	0.0641439	1.42081e-30
HMG CoA Synthesis	3	14	0.428572	0.349605	0.205894
Indole-pyruvate oxidoreductase complex	3	14	0.428572	0.349605	0.205894
DNA-replication	595	2780	0.428058	0.0369699	1.77719e-92
Translation termination factors bacterial	140	661	0.423601	0.0731706	1.32451e-23
Peptidoglycan biosynthesis--gjo	51	241	0.423237	0.116725	1.70524e-09
CBSS-196164.1.peg.461	11	52	0.423078	0.224055	0.00708621
Pterin carbinolamine dehydratase	11	52	0.423078	0.224055	0.00708621
Outer membrane	77	365	0.421918	0.0963693	9.24056e-14
Alpha-acetolactate operon	4	19	0.421053	0.31689	0.123836
CBSS-323850.3.peg.3284	13	62	0.419356	0.207817	0.00300506
Bacterial RNA-metabolizing Zn-dependent hydrolases	9	43	0.418605	0.239184	0.0123894
tRNA aminoacylation, Phe	58	280	0.414286	0.107618	4.16324e-11
Anaerobic benzoate metabolism	6	29	0.413794	0.273345	0.0477291
CBSS-164757.7.peg.5020	13	63	0.412699	0.204356	0.00216648
Nitric oxide synthase	8	39	0.410257	0.244657	0.0193152
CBSS-243277.1.peg.4359	18	88	0.409092	0.177276	0.000266213
Galactosylceramide and Sulfatide metabolism	9	44	0.409092	0.233477	0.0124354
Peptidoglycan Biosynthesis	139	685	0.40584	0.0701029	3.21872e-26
Polyadenylation bacterial	32	158	0.405064	0.1371	4.3224e-07
Methionine Biosynthesis	99	491	0.403259	0.0816912	1.91875e-19
Protein degradation	104	516	0.403101	0.0798147	2.60716e-20
Homogentisate pathway of aromatic compound degradation	58	290	0.400001	0.103665	3.38843e-12
Rhamnose containing glycans	19	95	0.400001	0.169251	9.06646e-05
Translation elongation factors eukaryotic and archaeal	15	75	0.400001	0.18663	0.000487519
TRAP Transporter unknown substrate 9	3	15	0.400001	0.325778	0.209262
Tannin biosynthesis	1	5	0.400001	0.391539	0.670781
Purine conversions	148	746	0.396784	0.0664311	2.15474e-29
Xylose utilization	103	521	0.395395	0.0785202	4.32541e-21
n-Phenylalkanoic acid degradation	413	2107	0.392028	0.0401312	1.25729e-81
cell division core of larger cluster	64	327	0.391438	0.0968485	6.29401e-14
Nonhomologous End-Joining in Bacteria	9	46	0.391305	0.222921	0.00633258
De Novo Purine Biosynthesis	16	82	0.390245	0.177158	0.000229796
CBSS-211586.9.peg.2729	7	36	0.38889	0.24285	0.0221505
Lysine Biosynthesis DAP Pathway	58	299	0.387961	0.100324	5.00597e-13
Glutamine, Glutamate, Aspartate and Asparagine Biosynthesis	48	248	0.387098	0.109066	5.32585e-11
Glutamate transporter involved in acid tolerance in Streptococcus	30	156	0.384616	0.133522	1.98221e-07
CBSS-410289.13.peg.3174	5	26	0.384616	0.269277	0.054732
polyprenyl synthesis	73	381	0.383203	0.0890913	1.88201e-16
Threonine and Homoserine Biosynthesis	255	1331	0.383172	0.0493945	4.06517e-54
Global Two-component Regulator PrrBA in Proteobacteria	8	42	0.380953	0.226471	0.00994902
cell division cluster containing FtsQ	68	360	0.377779	0.0906635	5.0401e-16
Transport of Manganese	23	122	0.37705	0.146685	3.44637e-06
tRNA aminoacylation, Gly	35	186	0.376345	0.12192	7.12161e-09
Quinate degradation	24	128	0.375001	0.143177	1.62724e-06
Allantoin Utilization	12	65	0.369232	0.187714	0.000628755
tRNA aminoacylation, Val	30	165	0.363637	0.125804	1.92454e-08
NADPH:quinone oxidoreductase 2	9	50	0.360001	0.204356	0.00225709
RNA polymerase bacterial	103	576	0.35764	0.070512	9.36307e-27
Phage entry and exit	15	84	0.357144	0.165742	6.44352e-05
Alkanesulfonate assimilation	47	264	0.356062	0.100784	5.62996e-13
Putative TldE-TldD proteolytic complex	41	233	0.351932	0.105832	8.25288e-12
CBSS-196164.1.peg.1690	58	330	0.351516	0.090358	3.52657e-16
Trans-envelope signaling system VreARI in Pseudomonas	13	74	0.351352	0.172617	0.000146557
Sex pheromones in Enterococcus faecalis and other Firmicutes	77	440	0.350001	0.0789365	2.50331e-21
Polyhydroxybutyrate metabolism	51	295	0.345764	0.0941326	5.31591e-15
tRNA aminoacylation, Ile	28	162	0.34568	0.122942	7.75798e-09
Phage tail	21	122	0.344263	0.138532	7.21695e-07
Auxin biosynthesis	6	35	0.342858	0.224983	0.0118987
Serine-glyoxylate cycle	160	940	0.340426	0.0543789	1.69137e-45
Valine degradation	112	658	0.340426	0.0643519	2.93473e-32
CBSS-246196.1.peg.364	8	47	0.340426	0.201499	0.00239848
CBSS-290633.1.peg.1906	10	59	0.338984	0.18439	0.00051016
Leucine Degradation and HMG-CoA Metabolism	14	83	0.33735	0.160552	3.37904e-05
ABC transporter oligopeptide (TC 3.A.1.5.1)	88	523	0.336521	0.0711659	2.63885e-26
DNA repair, bacterial RecBCD pathway	23	137	0.335767	0.12985	7.93482e-08
YcfH	30	179	0.335196	0.115502	6.14184e-10
dTDP-rhamnose synthesis	6	36	0.333334	0.218533	0.008143
Bacterial hemoglobins	3	18	0.333334	0.270435	0.0673547
Chlorobenzoate degradation	3	18	0.333334	0.270435	0.0673547
Dimethylarginine metabolism	1	6	0.333334	0.326083	0.43667
tRNA modification Bacteria	328	1981	0.331147	0.0374393	2.89931e-97
Widespread colonization island	38	230	0.330436	0.102437	1.17377e-12
CBSS-316057.3.peg.3521	32	194	0.329898	0.1104	6.92102e-11
General Secretion Pathway	111	673	0.329867	0.0624981	2.34936e-34
Phosphate metabolism	227	1382	0.32851	0.0443061	4.17275e-69
Ammonia assimilation	28	172	0.325582	0.115438	6.57936e-10
DNA Repair Base Excision	53	328	0.323171	0.0861115	6.48705e-18
Twin-arginine translocation system	21	131	0.320611	0.128596	5.91355e-08
MukBEF Chromosome Condensation	46	288	0.319445	0.0907276	5.52669e-16
tRNA aminoacylation, Lys	25	157	0.318472	0.118482	2.10337e-09
tRNA aminoacylation, Ala	28	176	0.318183	0.112683	2.24795e-10
Glutaredoxins	59	372	0.317205	0.0804015	1.91545e-20
Nucleoid-associated proteins in Bacteria	15	95	0.31579	0.145713	3.74205e-06
CBSS-521098.4.peg.1460	6	38	0.31579	0.206676	0.00578937
CBSS-1313.3.peg.391	3	19	0.31579	0.255935	0.0677518
Glutathione: Redox cycle	52	330	0.315152	0.0845916	1.58367e-18
Sucrose-specific PTS	15	96	0.312501	0.144109	2.59958e-06
Nucleoside Catabolism cluster	11	71	0.30986	0.161839	5.42664e-05
D-Tagatose and Galactitol Utilization	26	168	0.309525	0.113054	3.34748e-10
Methionine Degradation	67	433	0.30947	0.0738822	3.0505e-24
Aromatic Amin Catabolism	6	39	0.307693	0.201213	0.0038831
Pseudomonas quinolone signal PQS	27	177	0.305085	0.109541	7.6694e-11
tRNAmodification position 34	177	1180	0.300001	0.0453297	1.06397e-65
Heat shock Cell division Proteases and a Methyltransferase	3	20	0.300001	0.242909	0.0451097
Type IV pilus	129	862	0.299305	0.0525505	1.2251e-48
L-Arabinose utilization	64	428	0.299066	0.0727855	7.16204e-25
ABC transporter branched-chain amino acid (TC 3.A.1.4.1)	85	574	0.296168	0.0632107	2.74264e-33
Isoleucine degradation	30	203	0.295568	0.101184	1.34015e-12
Glycine and Serine Utilization	15	102	0.29412	0.135309	5.88425e-07
NAD regulation	11	75	0.293336	0.152891	1.7658e-05
Two-component sensor regulator linked to Carbon Starvation Protein A	33	225	0.293336	0.0962484	4.76353e-14
Anaerobic respiratory reductases	34	233	0.291849	0.0944783	1.56444e-14
Entner-Doudoroff Pathway	23	158	0.291143	0.111828	3.47619e-10
Salicylate and gentisate catabolism	36	248	0.290327	0.0916335	1.71225e-15
Amidase clustered with urea and nitrile hydratase functions	1	7	0.285721	0.279378	0.283035
Extracellular Polysaccharide Biosynthesis of Streptococci	1	7	0.285721	0.279378	0.283035
CBSS-279010.5.peg.3195	3	21	0.285721	0.231148	0.0302395
Streptolysin S Biosynthesis and Transport	3	21	0.285721	0.231148	0.0302395
Catechol branch of beta-ketoadipate pathway	4	28	0.285721	0.212881	0.0133622
Perosamine Synthesis Vibrio	43	302	0.284775	0.0828991	7.45955e-19
NAD and NADP cofactor biosynthesis global	26	184	0.282617	0.102816	3.86271e-12
Glutamate and Aspartate uptake in Bacteria	51	362	0.281776	0.0758817	1.60936e-22
Proline, 4-hydroxyproline uptake and utilization	164	1165	0.281553	0.0439621	1.65713e-69
Transport of Iron	119	853	0.279025	0.0506914	8.73324e-52
Deoxyribose and Deoxynucleoside Catabolism	18	130	0.276934	0.117841	4.39424e-09
Prophage lysogenic conversion modules	4	29	0.275874	0.205386	0.00884769
Putative hemin transporter	39	283	0.27563	0.0837047	2.08111e-18
Nitrosative stress	38	277	0.27438	0.0842806	4.266e-18
Pyrimidine utilization	46	340	0.270602	0.0762226	4.16639e-22
Zinc regulated enzymes	101	749	0.269707	0.0528399	3.97721e-47
Phenylpropanoid compound degradation	28	208	0.269245	0.0946108	4.20389e-14
Redox-dependent regulation of nucleus processes	29	216	0.268533	0.0929074	1.41071e-14
Shikimate kinase containing cluster	20	149	0.268471	0.109112	1.48576e-10
CBSS-208964.1.peg.1012	2	15	0.266683	0.237091	0.0714333
Heme and Siroheme Biosynthesis	149	1121	0.26585	0.0433107	9.50771e-71
Triacylglycerol metabolism	32	242	0.26448	0.0875572	1.54742e-16
Propionate-CoA to Succinate Module	43	327	0.263014	0.0762627	7.99755e-22
Leucine Biosynthesis	58	442	0.262461	0.0664239	3.2663e-29
CBSS-83331.1.peg.4047	8	62	0.258084	0.151364	3.60479e-05
CBSS-323850.3.peg.3269	21	163	0.257689	0.102391	1.01923e-11
Lipid A-Ara4N pathway ( Polymyxin resistance )	68	529	0.257109	0.0604199	2.35579e-35
Phenylacetyl-CoA catabolic pathway (core)	37	288	0.256965	0.0796435	8.8013e-20
Molybdenum cofactor biosynthesis	48	374	0.256705	0.0707888	2.00485e-25
Orphan regulatory proteins	134	1046	0.256234	0.0438297	1.88944e-68
RNA processing and degradation, bacterial	70	547	0.255962	0.0593343	1.18877e-36
DNA repair, bacterial DinG and relatives	28	219	0.255728	0.0896748	1.88312e-15
Tricarboxylate transport system	6	47	0.25534	0.16614	0.000368094
Urease subunits	24	188	0.25534	0.0957619	1.61341e-13
Putative sugar ABC transporter (ytf cluster)	49	390	0.251305	0.0685847	6.34775e-27
Pterin biosynthesis	5	40	0.250023	0.173027	0.00124278
Staphylococcal phi-Mu50B-like prophages	7	56	0.250023	0.153908	7.68176e-05
Ribosome activity modulation	9	72	0.250023	0.140146	5.19491e-06
T4-like non-cyanophage core proteins	14	112	0.250023	0.117615	1.18223e-08
Rhamnolipids in Pseudomonas	9	73	0.2466	0.138156	5.24542e-06
Murein Hydrolases	31	252	0.246056	0.0823639	2.88278e-18
Vibrio Core Oligosaccharide Biosynthesis	57	465	0.245186	0.0623793	1.82542e-32
Streptococcus pyogenes Virulome	6	49	0.244923	0.159197	0.000256328
Capsular Polysaccharides Biosynthesis and Assembly	24	196	0.244923	0.091722	1.51125e-14
Polyglycerolphosphate lipoteichoic acid biosynthesis	5	41	0.243928	0.168709	0.000802927
Fatty acid degradation regulons	38	315	0.241297	0.0737022	7.63064e-23
Glycerol fermenation to 1,3-propanediol	19	160	0.237528	0.0981752	2.66788e-12
Acyl-CoA thioesterase II	2	17	0.235323	0.208975	0.0480897
Sortase	8	68	0.235323	0.137677	7.27983e-06
Purine Utilization	51	439	0.232376	0.0620626	3.30696e-32
Sialic Acid Metabolism	150	1300	0.2308	0.0372405	8.37316e-93
Lipoprotein sorting system	38	330	0.230273	0.0701811	9.15527e-25
Maltose and Maltodextrin Utilization	155	1348	0.230001	0.0365319	2.08819e-96
tRNA processing	65	566	0.229652	0.0547923	1.65423e-41
CBSS-354.1.peg.2917	19	166	0.228886	0.094473	3.51508e-13
Unknown carbohydrate utilization ( cluster Yeg )	31	274	0.226249	0.0754639	4.56414e-21
Heat shock dnaK gene cluster extended	31	275	0.225426	0.0751818	4.75314e-21
Photorespiration (oxidative C2 cycle)	38	338	0.224824	0.0684551	1.25731e-25
CBSS-342610.3.peg.1536	12	107	0.224271	0.111893	6.95325e-09
Peptidyl-prolyl cis-trans isomerase	37	330	0.224215	0.0690678	3.63153e-25
Glycerol and Glycerol-3-phosphate Uptake and Utilization	64	571	0.22414	0.0538098	1.27184e-42
Universal stress protein family	27	241	0.224039	0.0793919	8.42818e-19
ATP-dependent RNA helicases, bacterial	49	440	0.2227	0.0604147	2.28221e-33
CBSS-393131.3.peg.612	1	9	0.222195	0.217121	0.18061
Mycobacterium virulence operon involved in an unknown function with a Jag Protein and YidC and YidD	1	9	0.222195	0.217121	0.18061
Nitrogen fixation	3	27	0.222195	0.179047	0.00575436
Streptococcus pyogenes recombinatorial zone	3	27	0.222195	0.179047	0.00575436
Flagellum in Campylobacter	18	162	0.222195	0.0937741	4.75503e-13
Streptococcal group antigen operons	20	180	0.222195	0.0896363	2.28825e-14
CBSS-49338.1.peg.459	22	199	0.221079	0.085599	7.17966e-16
DNA replication, archaeal	10	91	0.219754	0.117796	6.26241e-08
ABC transporter dipeptide (TC 3.A.1.5.2)	59	538	0.219305	0.0546081	5.87563e-41
Urea decomposition	34	316	0.215165	0.068778	5.4234e-25
Serotype determining Capsular polysaccharide biosynthesis in Staphylococcus	5	47	0.212742	0.146707	9.95196e-05
Colanic acid biosynthesis	50	470	0.212742	0.0570847	1.09164e-36
Protection from Reactive Oxygen Species	28	268	0.208933	0.0727032	8.82226e-22
Lipopolysaccharide assembly cluster	31	297	0.208732	0.0693986	4.15702e-24
Glycerate metabolism	18	173	0.20807	0.0875927	1.75887e-14
tRNA aminoacylation, Cys	13	125	0.207978	0.100253	7.903e-11
CBSS-370552.3.peg.1240	3	29	0.206875	0.166541	0.00245055
CRISPRs	29	282	0.205652	0.0703894	3.64214e-23
Toluene degradation	4	39	0.205107	0.151892	0.000495802
Peripheral Glucose Catabolism Pathways	8	78	0.205107	0.119555	2.59308e-07
Listeria surface proteins: Internalin-like proteins	12	117	0.205107	0.10207	2.37121e-10
tRNA aminoacylation, Met	18	176	0.204524	0.0860521	4.88142e-15
CBSS-288000.5.peg.1793	9	89	0.202227	0.112685	3.60439e-08
CBSS-235909.3.peg.1769	1	10	0.19998	0.195368	0.113774
Ectoine biosynthesis and regulation	1	10	0.19998	0.195368	0.113774
Bacteriocin-like peptides Blp	2	20	0.19998	0.177315	0.0128097
Utilization of glutathione as a sulphur source	16	160	0.19998	0.0883948	6.58072e-14
Nudix proteins (nucleoside triphosphate hydrolases)	52	524	0.198454	0.0521711	6.79105e-43
D-gluconate and ketogluconates metabolism	53	535	0.198112	0.0516255	1.03253e-43
Bacterial Cytoskeleton	13	132	0.196951	0.0947775	9.75749e-12
Iron acquisition in Vibrio	29	295	0.196591	0.0671842	8.75846e-25
Flagellum	222	2264	0.196094	0.0260475	3.84144e-181
tRNA nucleotidyltransferase	20	204	0.19606	0.078764	1.22489e-17
RecA and RecX	6	62	0.193531	0.125134	3.71751e-06
Transport of Molybdenum	32	331	0.193336	0.063219	4.79368e-28
Phage lysis modules	11	114	0.192965	0.0992806	2.04534e-10
Siderophore Achromobactin	5	52	0.19229	0.132354	2.78917e-05
Polyamine Metabolism	164	1737	0.188814	0.0289224	3.1333e-143
Lactose and Galactose Uptake and Utilization	34	361	0.188349	0.0599283	5.17294e-31
CBSS-269801.1.peg.809	3	32	0.187484	0.150745	0.00100835
RNA 3'-terminal phosphate cyclase	3	32	0.187484	0.150745	0.00100835
Unknown carbohydrate utilization ( cluster Ydj )	52	558	0.186364	0.0488677	1.68325e-47
Benzoate transport and degradation cluster	4	43	0.186031	0.137528	0.000134689
SeqA and Co-occurring Genes	9	97	0.185551	0.10317	2.75229e-09
ABC transporter [iron.B12.siderophore.hemin]	6	65	0.1846	0.119252	1.59446e-06
Putrescine utilization pathways	38	413	0.184004	0.0556441	7.73054e-36
Stringent Response, (p)ppGpp metabolism	43	469	0.183354	0.0523972	1.46261e-40
EcsAB transporter affecting expression and secretion of secretory preproteins	1	11	0.181804	0.177576	0.0727094
CBSS-364106.7.peg.3211	32	353	0.181289	0.0591565	5.36356e-31
Phenylalanine and Tyrosine Branches from Chorismate	43	478	0.179902	0.0514066	7.16995e-42
CBSS-224911.1.peg.6954	10	112	0.178558	0.0952101	1.11809e-10
CBSS-12149.1.peg.3301	4	45	0.177764	0.131328	5.47173e-05
Nitrate and nitrite ammonification	103	1164	0.176962	0.0337052	9.92504e-101
LOS core oligosaccharide biosynthesis	51	578	0.176457	0.046618	5.86419e-51
Iron siderophore sensor & receptor system	13	148	0.175663	0.0842786	5.50959e-14
Osmotic stress cluster	9	103	0.174744	0.0970283	5.09101e-10
Lipopolysaccharide assembly	53	614	0.172626	0.0447871	1.05907e-54
RNA modification and chromosome partitioning cluster	5	58	0.172402	0.118436	3.06188e-06
Urea carboxylase and Allophanate hydrolase cluster	13	151	0.172173	0.082557	2.37231e-14
Molybdopterin cytosine dinucleotide	8	93	0.172031	0.0998595	2.21664e-09
Hyaluronate utilization	16	186	0.172031	0.0757096	1.92183e-17
Phenylpropionate Degradation	16	190	0.16841	0.0740806	5.1521e-18
CBSS-232721.5.peg.360	1	12	0.166656	0.162753	0.0731893
Cobalamin synthesis	2	24	0.166656	0.147556	0.00548024
Cell envelope-associated LytR-CpsA-Psr transcriptional attenuators	5	60	0.166656	0.114427	1.99351e-06
Denitrification	5	62	0.16128	0.11068	8.06978e-07
p-Hydroxybenzoate degradation	9	112	0.160705	0.0890816	2.23148e-11
Lysine degradation	22	274	0.160574	0.0615698	2.80012e-26
The mdtABCD multidrug resistance cluster	37	462	0.160163	0.0488176	2.4914e-43
Membrane-bound Ni, Fe-hydrogenase	18	225	0.15999	0.0668531	8.37995e-22
Dihydroxyacetone kinases	22	275	0.15999	0.0613343	2.88338e-26
Central meta-cleavage pathway of aromatic compound degradation	26	326	0.1595	0.0568726	3.91828e-31
CBSS-Phage terminase neighborhood	11	138	0.159411	0.0816416	7.81768e-14
Uptake of selenate and selenite	25	317	0.157719	0.0571841	1.69769e-30
Pyruvate Alanine Serine Interconversions	51	647	0.157641	0.0414992	1.14102e-60
EC699-706	13	165	0.157567	0.075417	1.78205e-16
Copper homeostasis: copper tolerance	9	115	0.156513	0.0867132	9.44898e-12
Programmed frameshift	7	90	0.155547	0.0947323	1.70977e-09
Trehalose Uptake and Utilization	58	748	0.155071	0.0384605	1.73189e-70
2-Ketogluconate Utilization	4	52	0.153838	0.11343	5.82909e-06
Lipid A modifications	19	247	0.153838	0.0627737	2.28922e-24
Glutathione: Non-redox reactions	28	364	0.153838	0.0530306	4.32024e-35
Selenoprotein O	6	79	0.151891	0.0977695	1.20033e-08
Xanthine Metabolism in Bacteria	20	265	0.150935	0.0602229	3.73763e-26
Beta-Glucoside Metabolism	62	835	0.148495	0.035669	2.29992e-80
CBSS-342610.3.peg.1794	2	27	0.148141	0.13104	0.00130816
Type III secretion system	33	454	0.145367	0.0465309	7.18241e-45
Ribosomal protein S5p acylation	9	125	0.143993	0.0796332	2.48769e-13
CBSS-52598.3.peg.2843	1	14	0.142851	0.139468	0.0279148
Biofilm Adhesin Biosynthesis	17	238	0.142851	0.0609953	2.94345e-24
Arginine and Ornithine Degradation	60	854	0.140509	0.0342105	1.38868e-84
Protein Acetylation and Deacetylation in Bacteria	4	58	0.137925	0.101565	9.94874e-07
Common Pathway For Synthesis of Aromatic Compounds (DAHP synthase to chorismate)	23	334	0.137719	0.0516212	2.58645e-34
Proton-dependent Peptide Transporters	13	189	0.13756	0.0656498	5.41143e-20
Quinone oxidoreductase family	7	102	0.137249	0.0834079	2.90035e-11
Acetoin, butanediol metabolism	9	132	0.136358	0.0753258	2.57006e-14
Rcs phosphorelay signal transduction pathway	25	371	0.134765	0.0486859	2.54154e-38
CBSS-366602.3.peg.5141	1	15	0.133328	0.130157	0.0296455
Melibiose Utilization	2	30	0.133328	0.117905	0.000514458
Chorismate: Intermediate for synthesis of Tryptophan, PAPA antibiotics, PABA, 3-hydroxyanthranilate and more.	6	91	0.131863	0.084699	1.99151e-10
Coenzyme PQQ synthesis	10	154	0.129865	0.0688304	6.22542e-17
NiFe hydrogenase maturation	16	249	0.128509	0.0561881	1.32577e-26
Alkanesulfonates Utilization	20	312	0.128201	0.0509699	4.9527e-33
Citrate Metabolism, Transport, and Regulation	14	222	0.126122	0.0583054	3.42739e-24
CBSS-224308.1.peg.3555	1	16	0.124996	0.122011	0.0176492
One-carbon metabolism by tetrahydropterines	4	64	0.124996	0.0919467	9.32838e-08
CBSS-208964.1.peg.3826	8	128	0.124996	0.0721394	1.71845e-14
Synthesis of osmoregulated periplasmic glucans	19	305	0.124586	0.0506267	7.50303e-33
Phenazine biosynthesis	8	130	0.123073	0.0710133	1.11913e-14
Major Outer Membrane Proteins	25	412	0.121355	0.0437397	1.70871e-44
Aromatic amino acid degradation	17	286	0.118878	0.0505908	2e-31
Phage tail proteins	5	85	0.117644	0.0804036	3.28625e-10
CoA disulfide thiol-disulfide redox system	3	52	0.115382	0.0923417	1.04133e-06
Prophage cluster in the proteobacteria	23	400	0.114997	0.0429568	4.13973e-44
Translation initiation factors eukaryotic and archaeal	2	35	0.114283	0.100947	7.84632e-05
L-fucose utilization	7	123	0.113818	0.0689955	1.74247e-14
Osmoregulation	3	53	0.113205	0.0905933	1.09582e-06
PnuC-like transporters	7	124	0.1129	0.0684318	1.11147e-14
Peptide ABC transport system Sap	14	249	0.112447	0.0518638	3.12698e-28
Cyanate hydrolysis	1	18	0.111108	0.108438	0.00661111
Fructose and Mannose Inducible PTS	1	18	0.111108	0.108438	0.00661111
CBSS-584.1.peg.1352	3	54	0.111108	0.0889129	6.53744e-07
DNA repair system including RecA, MutS and a hypothetical protein	3	54	0.111108	0.0889129	6.53744e-07
Siderophore Enterobactin	28	524	0.106868	0.0365357	4.99212e-59
CBSS-393130.3.peg.794	1	19	0.105261	0.102723	0.00703176
D-galactonate catabolism	9	173	0.104044	0.0572581	1.38802e-20
USS-DB-7	100	1965	0.101779	0.0193766	2.62536e-221
2-phosphoglycolate salvage	6	119	0.100838	0.0645441	1.05866e-14
Fructose utilization	7	140	0.0999982	0.0605487	3.82118e-17
Hfl operon	8	160	0.0999982	0.0575554	2.1995e-19
D-Galacturonate and D-Glucuronate Utilization	23	475	0.0968405	0.0360412	9.19385e-56
Glyoxylate bypass	3	62	0.0967726	0.0773486	3.75311e-08
CBSS-316407.3.peg.2816	6	126	0.0952366	0.0608986	9.60388e-16
D-galactarate, D-glucarate and D-glycerate catabolism - gjo	15	318	0.0943381	0.0421516	4.78266e-38
Colonization factor antigen I fimbriae	7	149	0.0939583	0.0568294	2.28015e-18
KDO2-Lipid A biosynthesis	12	261	0.0919527	0.0450445	8.48068e-32
Siderophore Pyoverdine	20	436	0.0917418	0.0362502	3.09892e-52
Recycling of Peptidoglycan Amino Sugars	6	131	0.0916017	0.0585943	1.4299e-16
L-Cystine Uptake and Metabolism	10	223	0.0896849	0.047264	1.44504e-27
L-fucose utilization temp	3	67	0.089551	0.0715602	5.37035e-09
Cell division-ribosomal stress proteins cluster	1	23	0.0869555	0.0848404	0.00163142
Iron acquisition in Streptococcus	1	23	0.0869555	0.0848404	0.00163142
Late competence	7	169	0.0828394	0.0500062	1.72653e-21
Hexose Phosphate Uptake System	9	219	0.0821909	0.0450958	1.30196e-27
Putative diaminopropionate ammonia-lyase cluster	21	513	0.0818705	0.0316129	1.98296e-63
Conserved gene cluster possibly involved in RNA metabolism	1	25	0.0799992	0.0780466	0.000566754
Autoinducer 2 (AI-2) transport and processing (lsrACDBFGE operon)	9	233	0.0772526	0.042384	5.75206e-30
Pyridoxin(Vitamin B6) Degradation Pathway	2	52	0.0769224	0.0678535	2.55266e-07
CBSS-83333.1.peg.2911	1	27	0.0740735	0.0722601	0.000373102
Phage shock protein (psp) operon	6	164	0.0731702	0.046693	7.83605e-22
Methylcitrate cycle	2	55	0.0727268	0.064143	5.39487e-08
Sucrose utilization	6	180	0.0666663	0.0425281	2.14272e-24
Formate hydrogenase	36	1118	0.0644004	0.0195059	5.21025e-146
CBSS-326442.4.peg.1852	4	128	0.0624997	0.0457323	7.98076e-18
Tolerance to colicin E2	5	163	0.0613495	0.0416974	1.27475e-22
Ethanolamine utilization	10	337	0.059347	0.0311508	7.97546e-46
D-Sorbitol(D-Glucitol) and L-Sorbose Utilization	8	271	0.0590404	0.0338235	3.70123e-37
CBSS-360102.4.peg.4134	1	35	0.0571427	0.0557314	1.9002e-05
Tellurite resistance: Chromosomal determinants	3	106	0.0566036	0.0451029	3.76603e-15
N-Acetyl-Galactosamine and Galactosamine Utilization	16	575	0.055652	0.0240698	1.80637e-78
Sulfate reduction-associated complexes	1	36	0.0555554	0.0541822	1.07951e-05
Intracellular septation in Enterobacteria	3	110	0.0545453	0.0434505	8.55993e-16
CBSS-393011.11.peg.386	1	39	0.051282	0.0500114	2.37337e-06
Adhesins in Staphylococcus	2	81	0.0493827	0.0434933	4.55314e-12
2,3-diketo-L-gulonate TRAP transporter	1	45	0.0444444	0.043339	3.06075e-07
Natural DNA Transformation in Vibrio	1	45	0.0444444	0.043339	3.06075e-07
Purine nucleotide synthesis regulator	1	45	0.0444444	0.043339	3.06075e-07
EC49-61	6	271	0.0442804	0.0281659	2.45262e-39
CBSS-316407.3.peg.1371	1	46	0.0434782	0.0423963	1.82596e-07
CBSS-584.1.peg.841	2	97	0.0412371	0.0362967	5.99714e-15
PA0057 cluster	2	97	0.0412371	0.0362967	5.99714e-15
trimethylamine N-oxide (TMAO) reductase	9	443	0.0406321	0.0221733	1.51354e-64
CBSS-314225.3.peg.1533	4	199	0.040201	0.0293328	1.43672e-29
Curli production	2	100	0.04	0.0352038	2.13778e-15
Fructoselysine (Amadori product) utilization pathway	1	51	0.0392157	0.0382373	2.42614e-08
Flavohaemoglobin	5	268	0.0373134	0.0253137	4.63047e-40
Taurine Utilization	5	268	0.0373134	0.0253137	4.63047e-40
Cyanophycin Metabolism	1	55	0.0363637	0.0354548	5.22604e-09
Mannitol Utilization	6	334	0.0359282	0.0228448	7.15239e-50
Acetyl-CoA fermentation to Butyrate	4	224	0.0357143	0.0260692	9.68569e-34
Phosphonate metabolism	1	62	0.0322581	0.0314497	4.02669e-10
Sugar-phosphate stress regulation	1	64	0.03125	0.0304664	1.48647e-10
The fimbrial Sfm cluster	2	141	0.0283688	0.0249655	3.04667e-22
Type III secretion system orphans	2	147	0.0272109	0.023945	2.26774e-23
Transport of Nickel and Cobalt	4	296	0.0270271	0.0197098	6.52411e-46
Phage nin genes - N-independent survival	2	149	0.0268457	0.0236232	1.45628e-23
CBSS-562.2.peg.5158 SK3 including	1	77	0.0259741	0.0253202	1.58183e-12
Carbon Starvation	3	234	0.0256411	0.0203885	8.96129e-37
CBSS-83333.1.peg.946	2	163	0.0245399	0.0215914	4.8433e-26
Conserved cluster around inner membrane protein gene yghQ, probably involved in polysaccharide biosynthesis	1	98	0.0204082	0.0198919	2.28894e-16
Unknown sugar utilization (cluster yphABCDEFG)	2	206	0.0194175	0.0170791	2.00732e-33
Pyridoxin (Vitamin B6) Biosynthesis	1	105	0.0190476	0.0185651	1.66788e-17
Type VI secretion systems	3	373	0.0160858	0.0128096	9.7148e-61
CBSS-211586.1.peg.2357	1	132	0.0151462	0.0147605	3.22145e-22
Two partner secretion pathway (TPS)	4	580	0.0137786	0.0100431	9.1976e-95
Osmoprotectant ABC transporter YehZYXW of Enterobacteriales	1	182	0.0110186	0.0107365	8.43175e-31
Peptidoglycan Crosslinking of Peptide Stems	1	251	0.0079838	0.00777707	8.67003e-43
Yfa cluster	1	270	0.00742097	0.00722823	3.43514e-46

## Sheet: SEED_Level_4
Subsystems	Number of hits in exact matches (from 276,546 matches)	Number of hits in control sample (from 553,092 control matches)	Enrichment	Enrichment error ci95	p value
Integron integrase IntI1	1237	2	1232.99	893.753	0
Tetracycline resistance protein TetW	425	1	846.027	693.615	5.91266e-201
Integron integrase IntIPac	623	4	313.48	192.224	1.14072e-288
Tetracycline resistance protein TetM	1629	13	250.583	104.212	0
TniB NTP-binding protein	1156	11	210.144	93.3951	0
Mercuric resistance operon coregulator	383	5	153.149	88.1676	2.06357e-173
rRNA adenine N-6-methyltransferase (EC 2.1.1.48)	271	4	135.443	83.0701	2.53853e-122
Il-IS_2, transposase	811	12	135.109	58.2467	0
Cd(II)/Pb(II)-responsive transcriptional regulator	302	5	120.737	69.6182	2.64182e-135
Mercuric transport protein, MerE	342	6	113.933	62.1544	1.6048e-152
Mercuric transport protein, MerC	192	4	95.922	59.0211	3.07112e-85
Resolvase/Integrase TinR protein	178	4	88.9164	54.7336	1.08364e-78
Periplasmic mercury(+2) binding protein	574	13	88.2231	36.9811	1.43473e-250
Spectinomycin 9-O-adenylyltransferase	881	20	88.0149	31.3055	0
Integron integrase IntI2	40	1	79.9081	66.3519	2.28005e-18
Streptomycin 3''-O-adenylyltransferase (EC 2.7.7.47)	524	14	74.759	30.4885	7.68327e-226
Mercuric transport protein, MerT	519	14	74.0438	30.2716	1.62572e-223
FIG076210: Hypothetical protein	433	14	61.7409	25.2945	1.31223e-183
FIG049434: Periplasmic protein TonB, links inner and outer membranes	728	24	60.7726	20.3402	6.03401e-307
Insertion element IS1 protein insB	750	25	60.0998	19.7899	8.33318682198228e-316
DNA topoisomerase III, Bacteroidales-type (EC 5.99.1.2)	167	6	55.7285	30.6894	6.59251e-71
ISPsy4, transposition helper protein	2713	104	52.2003	9.36472	0
Integrase, superantigen-encoding pathogenicity islands SaPI	267	11	48.5457	21.8492	8.1817e-111
Programmed cell death antitoxin PemI	88	4	43.9999	27.4115	5.87415e-37
TniQ	83	4	41.4999	25.8859	1.1375e-34
Type III restriction-modification system DNA endonuclease res (EC 3.1.21.5)	20	1	39.9999	33.6023	4.11274e-09
Phage DNA invertase	219	11	39.8181	18.0105	7.59903e-89
FIG076676: Hypothetical protein	421	22	38.2726	13.3342	1.98361e-168
TniA putative transposase	355	20	35.4999	12.8594	1.11041e-140
Streptothricin acetyltransferase, Streptomyces lavendulae type	159	9	35.3333	17.1897	8.93656e-64
Mercuric ion reductase (EC 1.16.1.1)	1161	72	32.25	6.85463	0
Mercuric resistance operon regulatory protein	594	37	32.1081	9.07729	1.80586e-230
FIG046709: Hypothetical protein	271	17	31.8823	12.3467	6.39786e-106
Phage tape measure	79	5	31.6	18.616	8.57688e-32
FIG041301: Hypothetical protein	242	16	30.25	12.0016	6.63146e-94
Conjugative transfer protein TraV	15	1	30	25.3843	7.66817e-07
FIG036757: Plasmid-related protein	276	19	29.0526	10.805	4.03255e-106
Membrane lipoprotein lipid attachment site containing protein USSDB6D	86	6	28.6667	16.023	6.06668e-34
Organomercurial lyase (EC 4.99.1.2)	14	1	28	23.7401	2.16095e-06
Vancomycin response regulator VanR	13	1	26.0001	22.0949	6.06442e-06
Predicted nucleotidyltransferases	112	9	24.889	12.2414	1.13299e-42
Resolvase/integrase Bin	280	23	24.3479	8.44662	5.01953e-104
FIG034376: Hypothetical protein	379	32	23.6876	7.19903	2.03536e-139
Type IV secretion system protein VirD4	183	16	22.8752	9.15592	1.24964e-67
Transmembrane component BL0694 of energizing module of predicted ECF transporter	56	5	22.4002	13.3536	1.57045e-21
Cobalt-zinc-cadmium resistance protein CzcD	883	80	22.0752	4.53958	2.37687225383584e-317
Vancomycin Teicoplanin A-type resistance protein VanA	11	1	22.0002	18.8026	4.70488e-05
Lipoprotein signal peptidase (EC 3.4.23.36)	746	68	21.9414	4.835	4.53467e-268
Cadmium-transporting ATPase (EC 3.6.3.3)	138	13	21.231	9.21684	1.58321e-50
Conjugative transfer protein TraA	10	1	20.0003	17.1551	0.000129851
RNA polymerase sigma factor SigW	10	1	20.0003	17.1551	0.000129851
Superfamily II DNA/RNA helicases, SNF2 family	536	54	19.8522	4.86537	1.22524e-188
iron aquisition outermembrane yersiniabactin receptor (FyuA,Psn,pesticin receptor)	513	52	19.7311	4.91032	2.37164e-180
Arsenical-resistance protein ACR3	301	31	19.4197	6.0274	4.03433e-106
ABC transporter ATP-binding protein USSDB6B	95	10	19.0004	9.10657	2.51229e-34
Cadmium efflux system accessory protein	57	6	19.0004	10.7891	4.01879e-21
ATP-dependent DNA helicase pcrA (EC 3.6.1.-)	198	21	18.8575	6.85354	7.67269e-70
Duplicated ATPase component BL0693 of energizing module of predicted ECF transporter	94	10	18.8004	9.01703	6.82149e-34
FIG016425: Soluble lytic murein transglycosylase and related regulatory proteins (some contain LysM/invasin domains)	302	33	18.3035	5.55104	7.00592e-105
Arsenical resistance operon trans-acting repressor ArsD	27	3	18.0005	12.4614	1.66637e-10
Alpha-N-arabinofuranosidase 2 (EC 3.2.1.55)	9	1	18.0005	15.5063	0.000355672
Heavy metal resistance transcriptional regulator HmrR	9	1	18.0005	15.5063	0.000355672
Ribose 1,5-bisphosphate or 5-ribose-1,2-cyclic phosphate dehydrogenase	9	1	18.0005	15.5063	0.000355672
Arsenic resistance protein ArsH	187	22	17.0006	6.09848	2.76572e-64
Antibiotic biosynthesis monooxygenase	179	23	15.566	5.51411	4.30321e-60
Arsenical pump-driving ATPase (EC 3.6.3.16)	69	9	15.3341	7.70784	6.10345e-24
ABC-type transport system involved in resistance to organic solvents, periplasmic component USSDB6C	89	12	14.8342	6.75065	3.41052e-30
Site-specific recombinase	388	59	13.1539	3.17133	1.18929e-121
CopG protein	157	24	13.0847	4.60481	4.07089e-50
Putative 2Fe-2S ferredoxin CbiW involved in B12 biosynthesis	13	2	13.0014	10.0583	3.14369e-05
Copper resistance protein B	198	32	12.3766	3.88865	1.32252e-61
iron aquisition 2,3-dihydroxybenzoate-AMP ligase (EC 2.7.7.58,Irp5)	210	34	12.3545	3.78559	3.36401e-65
2-aminomuconate semialdehyde dehydrogenase (EC 1.2.1.32)	6	1	12.0017	10.5459	0.00685901
Conjugative transfer protein 345	6	1	12.0017	10.5459	0.00685901
Dihydrodiol dehydrogenase (EC 1.3.1.56)	6	1	12.0017	10.5459	0.00685901
Hyaluronan synthase (EC 2.4.1.212)	6	1	12.0017	10.5459	0.00685901
rRNA adenine N-6-methyltransferase (EC 2.1.1.48) (Macrolide-lincosamide-streptogramin B resistance protein) (Erythromycin resistance protein)	6	1	12.0017	10.5459	0.00685901
ABC transporter, ATP-binding protein Vex2	28	5	11.2021	6.93284	1.49343e-09
intein-containing	27	5	10.8023	6.70261	3.81349e-09
Transcriptional regulator, ArsR family	769	143	10.7576	1.7702	6.23211e-222
Single-stranded DNA-binding protein	492	94	10.4706	2.09083	3.71642e-141
Cyclomaltodextrin glucanotransferase (EC 2.4.1.19)	5	1	10.0017	8.88273	0.0178332
Flagellar protein FlbB	5	1	10.0017	8.88273	0.0178332
Lysyl-tRNA synthetase (class I) (EC 6.1.1.6)	5	1	10.0017	8.88273	0.0178332
Phage lower baseplate protein (TP901-1-like ORF49)	5	1	10.0017	8.88273	0.0178332
Predicted erythritol ABC transporter 2, ATP-binding component	5	1	10.0017	8.88273	0.0178332
Predicted rhamnose oligosaccharide ABC transport system, permease component 2	5	1	10.0017	8.88273	0.0178332
Sirohydrochlorin cobaltochelatase CbiK (EC 4.99.1.3)	55	11	10.0017	4.82419	7.9075e-17
iron aquisition yersiniabactin synthesis enzyme (Irp1,polyketide synthetase)	1036	213	9.72873	1.3429	8.31819e-286
DNA repair protein RadC	567	118	9.61097	1.74371	1.46686e-156
Insertion element IS1 protein insA	72	15	9.60083	4.14878	2.98596e-21
Chloramphenicol acetyltransferase (EC 2.3.1.28)	104	22	9.45503	3.53007	7.40104e-30
iron aquisition yersiniabactin synthesis enzyme (Irp3)	193	41	9.41502	2.72353	5.68988e-54
ATP-binding protein p271	28	6	9.33354	5.542	5.74712e-09
ABC transporter membrane-spanning permease, Pep export, Vex3	42	9	9.33354	4.85548	8.07805e-13
Multicopper oxidase	336	73	9.20544	2.07843	9.18504e-92
Excinuclease ABC subunit A paralog of unknown function	101	22	9.18178	3.43534	1.12101e-28
Superoxide dismutase ChrC	9	2	8.99996	7.13717	0.00137186
ABC-type transport system involved in resistance to organic solvents, permease component USSDB6A	98	22	8.90905	3.34267	1.67174e-27
NAD(P)-dependent glyceraldehyde 3-phosphate dehydrogenase archaeal (EC 1.2.1.59)	48	11	8.72724	4.25808	4.57175e-14
ABC transporter membrane-spanning permease, Pep export, Vex1	21	5	8.39996	5.31735	9.31344e-07
Transcriptional activator protein LysR	125	30	8.33329	2.77619	1.31843e-33
Arsenate reductase (EC 1.20.4.1)	421	102	8.25486	1.62079	1.0425e-108
Substrate-specific component BL0695 of predicted ECF transporter	45	11	8.18178	4.01534	6.61813e-13
1,3-propanediol dehydrogenase (EC 1.1.1.202)	4	1	7.99996	7.2083	0.0452684
2-aminomuconate deaminase (EC 3.5.99.5)	4	1	7.99996	7.2083	0.0452684
Endopeptidase spore protease Gpr (EC 3.4.24.78)	4	1	7.99996	7.2083	0.0452684
GltC, transcription activator of glutamate synthase operon	4	1	7.99996	7.2083	0.0452684
Lysine 2-monooxygenase (EC 1.13.12.2)	4	1	7.99996	7.2083	0.0452684
Predicted erythritol ABC transporter 2, hypothetical lipoprotein	4	1	7.99996	7.2083	0.0452684
Beta-lactamase class D	8	2	7.99996	6.40348	0.00340419
Chlorocatechol 1,2-dioxygenase	8	2	7.99996	6.40348	0.00340419
Conjugative transfer protein 234	8	2	7.99996	6.40348	0.00340419
Beta-glucanase precursor (EC 3.2.1.73)	12	3	7.99996	5.84115	0.000285151
FIG006126: DNA helicase, restriction/modification system component YeeB	12	3	7.99996	5.84115	0.000285151
Copper resistance protein C precursor	145	37	7.83779	2.40737	1.39745e-37
iron aquisition yersiniabactin synthesis enzyme (YbtT,resembles thioesterases)	86	22	7.81814	2.96909	6.9469e-23
Retron-type reverse transcriptase	357	92	7.76082	1.60593	1.36043e-89
3-hydroxyacyl-CoA dehydrogenase [isoleucine degradation] (EC 1.1.1.35)	15	4	7.49995	5.11077	6.06634e-05
Transcriptional regulator, MerR family	495	133	7.44356	1.30911	9.34874e-121
Flagellin	101	28	7.21423	2.50721	1.53508e-25
Probable cadmium-transporting ATPase (EC 3.6.3.3)	18	5	7.19995	4.62376	1.31083e-05
Integrase	1723	484	7.11978	0.687548	0
Erythritol kinase EryA (EC 2.7.1.27)	7	2	6.99994	5.66718	0.00828169
Arsenical resistance operon repressor	147	42	6.99994	2.06279	7.31037e-36
Chromate transport protein ChrA	122	35	6.97137	2.21824	5.76145e-30
Hemolysin III	41	12	6.83327	3.30996	6.56897e-11
Siderophore biosynthesis non-ribosomal peptide synthetase modules	178	53	6.71692	1.79946	4.45229e-42
Toprim domain protein	20	6	6.6666	4.08454	6.73026e-06
Tn552 transposase	16	5	6.39993	4.15963	7.25246e-05
Heavy metal sensor histidine kinase	211	66	6.39387	1.56602	4.11957e-48
LysR family transcriptional regulator YnfL	238	79	6.02523	1.37267	6.13889e-52
ATP-dependent protease La (EC 3.4.21.53) LonB Type I	3	1	5.99992	5.51816	0.111112
Biphenyl dioxygenase beta subunit (EC 1.14.12.18)	3	1	5.99992	5.51816	0.111112
diglucosyldiacylglycerol synthase (LTA membrane anchor synthesis)	3	1	5.99992	5.51816	0.111112
L-fuconolactone hydrolase	3	1	5.99992	5.51816	0.111112
Phage terminase, large subunit [SA bacteriophages 11, Mu50B]	3	1	5.99992	5.51816	0.111112
Poly-gamma-glutamate synthase subunit PgsB/CapB (EC 6.3.2.-)	3	1	5.99992	5.51816	0.111112
Predicted rhamnose oligosaccharide ABC transport system, substrate-binding component	3	1	5.99992	5.51816	0.111112
Sarcosine dehydrogenase (EC 1.5.99.1)	3	1	5.99992	5.51816	0.111112
Sensor histidine kinase VanS (EC 2.7.3.-)	3	1	5.99992	5.51816	0.111112
Dipicolinate synthase subunit A (EC 4.2.1.52)	6	2	5.99992	4.92703	0.0196624
NAD-reducing hydrogenase subunit HoxE (EC 1.12.1.2)	9	3	5.99992	4.50259	0.00385586
ABC Fe3+ siderophore transporter, inner membrane subunit	15	5	5.99992	3.927	0.000167401
NADH dehydrogenase subunit 2	15	5	5.99992	3.927	0.000167401
RND efflux system, outer membrane lipoprotein, NodT	21	7	5.99992	3.54279	7.83501e-06
Copper-translocating P-type ATPase (EC 3.6.3.4)	1266	435	5.8206	0.60525	2.92285e-262
Alpha-N-arabinofuranosidase (EC 3.2.1.55)	26	9	5.77769	3.15416	1.5489e-06
Aromatic hydrocarbon utilization transcriptional regulator CatR (LysR family)	105	37	5.67558	1.80766	6.08488e-23
Zona occludens toxin	48	17	5.64696	2.45758	3.22836e-11
Oligo-1,6-glucosidase (EC 3.2.1.10)	28	10	5.5999	2.95974	6.34218e-07
Beta-lactamase (EC 3.5.2.6)	232	83	5.59026	1.25762	3.27738e-48
Threonine dehydrogenase and related Zn-dependent dehydrogenases	99	36	5.49989	1.77894	2.64825e-21
Cadmium resistance protein	8	3	5.33322	4.05317	0.00882372
Kynurenine formamidase (EC 3.5.1.9)	8	3	5.33322	4.05317	0.00882372
Ortho-halobenzoate 1,2-dioxygenase beta-ISP protein OhbA	8	3	5.33322	4.05317	0.00882372
SusD, outer membrane protein	80	31	5.16117	1.79073	1.3187e-16
LysR family transcriptional regulator YbhD	85	33	5.15139	1.74235	1.3164e-17
NADH-dependent butanol dehydrogenase A (EC 1.1.1.-)	18	7	5.14273	3.09319	0.000127867
ATPase provides energy for both assembly of type IV secretion complex and secretion of T-DNA complex (VirB11)	5	2	4.99987	4.18131	0.0452686
DNA sulfur modification protein DndD	5	2	4.99987	4.18131	0.0452686
Predicted maltose transporter MalT	5	2	4.99987	4.18131	0.0452686
Unspecified monosaccharide ABC transport system, ATP-binding protein	5	2	4.99987	4.18131	0.0452686
Alpha-1,4-N-acetylgalactosamine transferase PglJ (EC 2.4.1.-)	10	4	4.99987	3.55775	0.0040399
Conjugative transfer protein TraI, relaxase	15	6	4.99987	3.16665	0.00060499
N-acylglucosamine 2-epimerase (EC 5.1.3.8)	15	6	4.99987	3.16665	0.00060499
FIG045374: Type II restriction enzyme, methylase subunit YeeA	27	11	4.90895	2.55204	2.45961e-06
iron aquisition regulator (YbtA,AraC-like,required for transcription of FyuA/psn,Irp2)	71	29	4.89641	1.7586	1.93458e-14
ATP-dependent Clp protease ATP-binding subunit ClpA	379	155	4.89018	0.843931	3.21815e-70
Copper resistance protein D	179	74	4.83769	1.16772	9.28838e-34
RelE antibacterial toxin protein	12	5	4.79985	3.22578	0.00288973
Uridine kinase (EC 2.7.1.48)	19	8	4.74985	2.76432	0.000109916
Uncharacterized protein YaiN in in formaldehyde detoxification operon	54	23	4.6955	1.86203	6.8223e-11
FIG146085: 3-to-5 oligoribonuclease A, Bacillus type	7	3	4.66651	3.60114	0.0196625
RNA polymerase sporulation specific sigma factor SigG	7	3	4.66651	3.60114	0.0196625
Two-component response regulator yesN, associated with MetSO reductase	7	3	4.66651	3.60114	0.0196625
N-Acetyl-D-glucosamine ABC transport system, permease protein 1	21	9	4.66651	2.61767	4.95567e-05
Multidrug efflux membrane fusion protein MexE	44	19	4.63142	1.98283	3.80876e-09
Bacillosamine/Legionaminic acid biosynthesis aminotransferase PglE	23	10	4.59984	2.49396	2.29068e-05
Potassium uptake protein, integral membrane component, KtrB	49	22	4.45437	1.8114	1.09398e-09
Thiol:disulfide involved in conjugative transfer	11	5	4.39997	2.99062	0.00556203
Type III restriction-modification system methylation subunit (EC 2.1.1.72)	68	31	4.38707	1.55772	8.13965e-13
Beta-glucuronidase (EC 3.2.1.31)	88	41	4.29266	1.36153	8.26517e-16
Response regulator of zinc sigma-54-dependent two-component system	109	52	4.19228	1.20609	7.72678e-19
Two-component system response regulator	90	44	4.09088	1.26879	1.67401e-15
16S rRNA m(5)C 967 methyltransferase (EC 2.1.1.-)	2	1	3.99999	3.79176	0.259261
ATP-dependent DNA ligase (EC 6.5.1.1)	2	1	3.99999	3.79176	0.259261
Biphenyl dioxygenase system ferredoxin component	2	1	3.99999	3.79176	0.259261
Carbon monoxide dehydrogenase CooS subunit (EC 1.2.99.2)	2	1	3.99999	3.79176	0.259261
CRISPR-associated protein Csm6	2	1	3.99999	3.79176	0.259261
Ethylmalonyl-CoA epimerase	2	1	3.99999	3.79176	0.259261
FIG005453: Putative DeoR-family transcriptional regulator	2	1	3.99999	3.79176	0.259261
FIG038648: MoaD and/or ThiS families	2	1	3.99999	3.79176	0.259261
GCN5-related N-acetyltransferase, FIGfam019367	2	1	3.99999	3.79176	0.259261
Glycosyl-4,4'-diaponeurosporenoate acyltransferase precursor (EC 2.3.1.-)	2	1	3.99999	3.79176	0.259261
Homocitrate synthase (EC 2.3.3.14)	2	1	3.99999	3.79176	0.259261
Hypothetical protein involved in heavy metal export	2	1	3.99999	3.79176	0.259261
Lipoteichoic acid primase LtaP	2	1	3.99999	3.79176	0.259261
Methionine synthase activation domain (EC 2.1.1.13)	2	1	3.99999	3.79176	0.259261
Methylsuccinyl-CoA dehydrogenase, predicted by (Erb et al, 2007)	2	1	3.99999	3.79176	0.259261
N-acetylgalactosamine kinase, ROK-type (EC 2.7.1.157)	2	1	3.99999	3.79176	0.259261
OpcA, an allosteric effector of glucose-6-phosphate dehydrogenase, cyanobacterial	2	1	3.99999	3.79176	0.259261
Petrobactin ABC transporter, periplasmic binding protein	2	1	3.99999	3.79176	0.259261
Phosphoglyceromutase	2	1	3.99999	3.79176	0.259261
Poly-gamma-glutamate synthase subunit PgsC/CapC (EC 6.3.2.-)	2	1	3.99999	3.79176	0.259261
Protoporphyrin IX Mg-chelatase subunit H (EC 6.6.1.1)	2	1	3.99999	3.79176	0.259261
Putative glycogen debranching enzyme, archaeal type, TIGR01561	2	1	3.99999	3.79176	0.259261
RecD-like DNA helicase Atu2026	2	1	3.99999	3.79176	0.259261
TesB-like acyl-CoA thioesterase 5	2	1	3.99999	3.79176	0.259261
Transposase for insertion sequence element IS1557	2	1	3.99999	3.79176	0.259261
Type II secretion cytoplasmic ATP binding protein (PulE, ATPase)	2	1	3.99999	3.79176	0.259261
ABC-type bacteriocin/lantibiotic exporter, contains an N-terminal double-glycine peptidase domain	4	2	3.99999	3.42671	0.100139
CRISPR-associated protein TM1812	4	2	3.99999	3.42671	0.100139
Cytochrome c2	4	2	3.99999	3.42671	0.100139
Phage excisionase	4	2	3.99999	3.42671	0.100139
Predicted erythritol ABC transporter 2, permease component	4	2	3.99999	3.42671	0.100139
Uronate dehydrogenase (EC 1.1.1.203)	4	2	3.99999	3.42671	0.100139
Chromate resistance protein ChrB	6	3	3.99998	3.14572	0.0684342
FIG007959: peptidase, M16 family	8	4	3.99997	2.9284	0.0264658
Predicted cobalt transporter in Bacteroides_Porphyromonas	14	7	3.99995	2.48916	0.00202808
N-acetylglucosamine related transporter, NagX	18	9	3.99993	2.29356	0.000662153
Phosphonate ABC transporter permease protein phnE (TC 3.A.1.9.1)	50	25	3.99982	1.57168	4.39466e-09
Phage tail fiber protein	1076	544	3.95587	0.391133	6.37969e-162
Helicase loader DnaI	57	29	3.93101	1.45899	5.52373e-10
DNA topoisomerase III (EC 5.99.1.2)	235	121	3.88425	0.778368	3.40856e-36
Protein serine/threonine phosphatase PrpC, regulation of stationary phase	38	20	3.79986	1.64358	8.11656e-07
N-acetylmannosaminyltransferase (EC 2.4.1.187)	15	8	3.74979	2.25725	0.00286202
Propionyl-CoA carboxylase beta chain (EC 6.4.1.3)	33	18	3.66629	1.66085	7.65451e-06
Nucleotide pyrophosphatase (EC 3.6.1.9)	11	6	3.66629	2.42335	0.00902363
RND efflux system, outer membrane lipoprotein, NodT family	148	81	3.65392	0.885268	6.13027e-22
Cob(I)alamin adenosyltransferase PduO (EC 2.5.1.17)	42	23	3.65176	1.50506	4.23297e-07
DNA-binding heavy metal response regulator	138	76	3.63192	0.906761	1.81374e-20
Aerobic cobaltochelatase CobS subunit (EC 6.6.1.2)	9	5	3.60024	2.51679	0.0208597
Circadian input kinase A	9	5	3.60024	2.51679	0.0208597
Probable GTPase related to EngC	9	5	3.60024	2.51679	0.0208597
Sensor histidine kinase VncS	9	5	3.60024	2.51679	0.0208597
Succinate dehydrogenase cytochrome b subunit	9	5	3.60024	2.51679	0.0208597
Superoxide dismutase [Mn] (EC 1.15.1.1)	9	5	3.60024	2.51679	0.0208597
Transcriptional regulator, TetR family	1161	659	3.52352	0.32444	2.03483e-154
2,3-dihydroxybiphenyl 1,2-dioxygenase	7	4	3.49999	2.61023	0.0501903
Beta-lactamase	7	4	3.49999	2.61023	0.0501903
O-antigen export system, permease protein	7	4	3.49999	2.61023	0.0501903
2,3-dihydro-2,3-dihydroxybenzoate dehydrogenase (EC 1.3.1.28)	5	3	3.33333	2.68478	0.126962
5-dehydro-4-deoxyglucarate dehydratase (EC 4.2.1.41)	5	3	3.33333	2.68478	0.126962
ATP-dependent DNA helicase SCO5183	5	3	3.33333	2.68478	0.126962
Two-component response regulator VncR	10	6	3.33333	2.23571	0.0174688
DNA-binding protein HU	15	9	3.33333	1.96673	0.00400221
benzoate MFS transporter BenK	25	15	3.33333	1.64321	0.000169731
Cystathionine gamma-lyase (EC 4.4.1.1)	25	15	3.33333	1.64321	0.000169731
FIG003847: Oxidoreductase (flavoprotein)	13	8	3.25	2.00139	0.00911317
Gluconolactonase (EC 3.1.1.17)	13	8	3.25	2.00139	0.00911317
Glutathione-regulated potassium-efflux system protein KefB	167	103	3.24271	0.721303	1.48981e-21
Integrase/recombinase (XerC/CodV family)	8	5	3.2	2.27696	0.039794
SusC, outer membrane protein involved in starch binding	124	79	3.13924	0.790734	8.00792e-16
probable lipoprotein	100	64	3.125	0.864179	7.5038e-13
2-Keto-D-gluconate dehydrogenase (EC 1.1.99.4), membrane-bound, gamma subunit	3	2	3	2.65635	0.341563
beta-hexosaminidase precursor	3	2	3	2.65635	0.341563
Crotonyl-CoA carboxylase/reductase, ethylmalonyl-CoA producing	3	2	3	2.65635	0.341563
Mll9366 protein	3	2	3	2.65635	0.341563
N-Acetyl-D-glucosamine permease 2, possible	3	2	3	2.65635	0.341563
Polypeptide composition of the spore coat protein CotJC	3	2	3	2.65635	0.341563
Propanediol utilization polyhedral body protein PduN	3	2	3	2.65635	0.341563
RNA polymerase sigma factor SigV	3	2	3	2.65635	0.341563
YeeC-like protein	3	2	3	2.65635	0.341563
Carbon monoxide dehydrogenase medium chain (EC 1.2.99.2)	6	4	3	2.28859	0.0939058
DNA-binding protein HBsu	6	4	3	2.28859	0.0939058
Trehalose 6-phosphate phosphorylase (EC 2.4.1.216)	6	4	3	2.28859	0.0939058
Acetoin dehydrogenase E1 component alpha-subunit (EC 1.2.4.-)	27	18	3	1.40735	0.000355747
Cu(I)-responsive transcriptional regulator	30	20	3	1.35169	0.000126966
Pyruvate phosphate dikinase	25	17	2.94117	1.41492	0.000792929
Radical SAM domain heme biosynthesis protein	19	13	2.92308	1.55358	0.00398596
Alpha-1,2-mannosidase	147	101	2.91089	0.666777	1.04513e-16
N-Acetyl-D-glucosamine ABC transport system, sugar-binding protein	29	20	2.9	1.31498	0.000219979
Zinc-regulated outer membrane receptor	26	18	2.88889	1.36465	0.000588997
Beta-galactosidase (EC 3.2.1.23)	358	249	2.8755	0.436234	4.4475e-38
Sensor protein copS (EC 2.7.3.-)	10	7	2.85714	1.87543	0.0369267
Glucoamylase (EC 3.2.1.3)	30	21	2.85714	1.27493	0.0002617
(R)-citramalate synthase (EC 2.3.1.182)	7	5	2.8	2.03502	0.120397
4-oxalocrotonate decarboxylase (EC 4.1.1.77)	7	5	2.8	2.03502	0.120397
D-tagatose 3-epimerase (EC 5.3.1.-)	7	5	2.8	2.03502	0.120397
Hypothetical Nudix-like regulator	7	5	2.8	2.03502	0.120397
Superoxide dismutase SodM-like protein ChrF	7	5	2.8	2.03502	0.120397
Dihydrolipoamide dehydrogenase of acetoin dehydrogenase (EC 1.8.1.4)	21	15	2.8	1.42407	0.0022901
Vancomycin B-type resistance protein VanW	18	13	2.76923	1.48645	0.00646083
Prolyl-tRNA synthetase (EC 6.1.1.15), archaeal/eukaryal type	11	8	2.75	1.74251	0.028809
Hypothetical protein VC0266 (sugar utilization related?)	15	11	2.72728	1.55682	0.0117065
Fructose-6-phosphate phosphoketolase (EC 4.1.2.22)	75	55	2.72728	0.827103	1.96422e-08
Xylulose-5-phosphate phosphoketolase (EC 4.1.2.9)	75	55	2.72728	0.827103	1.96422e-08
Thioredoxin	140	103	2.71845	0.62568	1.11854e-14
GTP-binding protein TypA/BipA	176	131	2.68703	0.556155	8.19478e-18
6-phospho-3-hexuloisomerase	4	3	2.66667	2.21557	0.231825
Antirepressor [SA bacteriophages 11, Mu50B]	4	3	2.66667	2.21557	0.231825
Beta-lactamase repressor BlaI	4	3	2.66667	2.21557	0.231825
FIGfam003972: membrane protein	4	3	2.66667	2.21557	0.231825
Redox-sensing transcriptional regulator QorR, putative	4	3	2.66667	2.21557	0.231825
UDP-N-acetyl-D-mannosaminuronate dehydrogenase	4	3	2.66667	2.21557	0.231825
Amino acid-binding ACT	8	6	2.66667	1.85529	0.0850197
NAD-dependent epimerase/dehydratase family protein	12	9	2.66667	1.63547	0.0340246
Pyruvate,phosphate dikinase (EC 2.7.9.1)	36	27	2.66667	1.09227	0.000134232
Transcription antitermination protein UpdY	29	22	2.63637	1.17349	0.0008597
cAMP-binding proteins - catabolite gene activator and regulatory subunit of cAMP-dependent protein kinases	71	54	2.62964	0.809709	9.9127e-08
Phage DNA binding protein	21	16	2.62501	1.31983	0.00447702
Periplasmic [Fe] hydrogenase large subunit (EC 1.12.7.2)	17	13	2.61539	1.41912	0.0105199
iron aquisition yersiniabactin synthesis enzyme (Irp2)	414	317	2.61199	0.360983	6.82016e-38
Cytochrome c-type biogenesis protein Ccs1/ResB	13	10	2.60001	1.54684	0.0253864
Excinuclease ABC subunit A paralog in greater Bacteroides group	9	7	2.57144	1.71929	0.063665
cyclolysin secretion ATP-binding protein	5	4	2.50001	1.96192	0.170859
N-methylhydantoinase A (EC 3.5.2.14)	5	4	2.50001	1.96192	0.170859
Response regulator CitB of citrate metabolism	5	4	2.50001	1.96192	0.170859
RNA polymerase sporulation specific sigma factor SigE	5	4	2.50001	1.96192	0.170859
COG2041: Sulfite oxidase and related enzymes	15	12	2.50001	1.40758	0.0226132
Periplasmic [Fe] hydrogenase (EC 1.12.7.2)	20	16	2.50001	1.26914	0.00716624
Transposase OrfAB, subunit B	25	20	2.50001	1.16688	0.00236836
Vitamin B12 ABC transporter, B12-binding component BtuF	69	56	2.4643	0.757289	5.49474e-07
anti sigma b factor antagonist RsbV	16	13	2.46155	1.35146	0.0171115
Sialidase (EC 3.2.1.18)	16	13	2.46155	1.35146	0.0171115
Acetoin dehydrogenase E1 component beta-subunit (EC 1.2.4.-)	27	22	2.45456	1.10841	0.00208733
ISPsy4, transposase	11	9	2.44446	1.52358	0.0552286
Predicted glucose transporter in maltodextrin utilization gene cluster	11	9	2.44446	1.52358	0.0552286
Acriflavin resistance protein	249	207	2.40581	0.413241	1.40452e-20
anti-sigma B factor RsbT	6	5	2.40002	1.78976	0.19723
Ferrichrome-binding periplasmic protein precursor (TC 3.A.1.14.3)	12	10	2.40002	1.44971	0.0420269
Redox-sensitive transcriptional activator SoxR	18	15	2.40002	1.25784	0.0149616
D-Lactate dehydrogenase (EC 1.1.2.5)	73	61	2.39346	0.713333	5.22308e-07
Glutamine synthetase type III, GlnN (EC 6.3.1.2)	25	21	2.38097	1.10163	0.00427126
Beta-mannosidase (EC 3.2.1.25)	38	32	2.37502	0.93025	0.000330338
Cation efflux system protein CusA	434	367	2.36514	0.311739	1.26224e-33
Cobalt-zinc-cadmium resistance protein CzcA	434	367	2.36514	0.311739	1.26224e-33
Cytochrome c-type biogenesis protein CcdA (DsbD analog)	13	11	2.36366	1.38656	0.0483394
Iron(III) dicitrate transmembrane sensor protein FecR	13	11	2.36366	1.38656	0.0483394
Cobalt/zinc/cadmium efflux RND transporter, membrane fusion protein, CzcB family	100	85	2.35296	0.608529	7.6087e-09
Probable poly(beta-D-mannuronate) O-acetylase (EC 2.3.1.-)	34	29	2.34485	0.958393	0.000760077
Transcriptional regulator, PadR family	97	83	2.33737	0.611814	1.86969e-08
Formiminotetrahydrofolate cyclodeaminase (EC 4.3.1.4)	7	6	2.33336	1.66191	0.142076
N-methylhydantoinase B (EC 3.5.2.14)	7	6	2.33336	1.66191	0.142076
NADH dehydrogenase (EC 1.6.99.3)	136	117	2.32481	0.522577	3.13697e-11
Cobalt-precorrin-4 C11-methyltransferase (EC 2.1.1.133)	29	25	2.32002	1.00828	0.00220716
Thymidine phosphorylase (EC 2.4.2.4)	74	64	2.31252	0.680116	1.18046e-06
anti-sigma F factor antagonist (spoIIAA-2)	15	13	2.30772	1.28342	0.027652
Sirohydrochlorin cobaltochelatase (EC 4.99.1.3)	15	13	2.30772	1.28342	0.027652
Phosphoglucosamine mutase (EC 5.4.2.10)	142	124	2.29035	0.503091	2.53181e-11
Optional hypothetical component of the B12 transporter BtuN	16	14	2.28574	1.24044	0.0310232
Phage integrase, Phage P4-associated	57	50	2.28003	0.748016	3.1459e-05
Phosphonate ABC transporter phosphate-binding periplasmic component (TC 3.A.1.9.1)	60	53	2.26418	0.725695	2.11452e-05
Cytochrome c-type biogenesis protein ResA	9	8	2.25003	1.4795	0.119624
Transcriptional regulator, Cro/CI family	77	69	2.23192	0.640295	1.57025e-06
Cobalt-precorrin-6 synthase, anaerobic	22	20	2.20003	1.05455	0.0130672
Protein of unknown function DUF208	23	21	2.19051	1.03152	0.0100768
FIG135464: Cytochrome c4	12	11	2.18185	1.30053	0.0745238
Membrane protein containing HD superfamily hydrolase domain, YQFF ortholog	12	11	2.18185	1.30053	0.0745238
Galactosamine-6-phosphate isomerase (galactosamine-6-phosphate deaminase) (EC 5.3.1.-)	13	12	2.16671	1.25529	0.056404
MSM (multiple sugar metabolism) operon regulatory protein	13	12	2.16671	1.25529	0.056404
Cobalt-precorrin-6y C5-methyltransferase (EC 2.1.1.-)	14	13	2.15389	1.2149	0.0634654
Glycyl-tRNA synthetase (EC 6.1.1.14)	14	13	2.15389	1.2149	0.0634654
GTP-binding protein	17	16	2.12504	1.11553	0.0401759
21 kDa hemolysin precursor	52	49	2.12249	0.713679	0.000189176
ATP-dependent DNA helicase UvrD/PcrA	176	168	2.09528	0.409017	1.25444e-11
Outer membrane vitamin B12 receptor BtuB	94	90	2.08894	0.541253	9.2758e-07
L-rhamnose operon transcriptional activator RhaR	38	37	2.05411	0.78277	0.00204636
2-hydroxy-3-keto-5-methylthiopentenyl-1-phosphate phosphatase related protein	1	1	2.00006	1.97458	1
2-phosphosulfolactate phosphatase (EC 3.1.3.71)	1	1	2.00006	1.97458	1
2,3-dihydroxybenzoate-AMP ligase (EC 2.7.7.58) [bacillibactin] siderophore	1	1	2.00006	1.97458	1
ABC transporter, periplasmic spermidine putrescine-binding protein potD (TC_3.A.1.11.1)	1	1	2.00006	1.97458	1
ABC-type Fe3+-siderophore transport system, periplasmic iron-binding component	1	1	2.00006	1.97458	1
Acetyl-CoA acetyltransferase (EC 2.3.1.9) of ethylmalonyl-CoA pathway	1	1	2.00006	1.97458	1
Acetyltransferase AcuA, acetyl-CoA synthetase inhibitor	1	1	2.00006	1.97458	1
Archaeal seryl-tRNA synthetase-related sequence	1	1	2.00006	1.97458	1
Arogenate dehydrogenase (EC 1.3.1.43)	1	1	2.00006	1.97458	1
ATP-binding protein ManX	1	1	2.00006	1.97458	1
ATP-dependent RNA helicase Atu1833	1	1	2.00006	1.97458	1
Carbon monoxide dehydrogenase large chain (EC 1.2.99.2) parolog without usual motifs	1	1	2.00006	1.97458	1
Catechol 1,2-dioxygenase 1 (EC 1.13.11.1)	1	1	2.00006	1.97458	1
CblZ, a non-orthologous displasment for Alpha-ribazole-5'-phosphate phosphatase	1	1	2.00006	1.97458	1
CDS_ID OB2202	1	1	2.00006	1.97458	1
Chorismate mutase II (EC 5.4.99.5)	1	1	2.00006	1.97458	1
CRISPR-associated protein, CT1972 family	1	1	2.00006	1.97458	1
enoyl-CoA hydratase, R-specific	1	1	2.00006	1.97458	1
Ethanolamine sensory transduction histidine kinase	1	1	2.00006	1.97458	1
Ethylmalonyl-CoA mutase, methylsuccinyl-CoA-forming	1	1	2.00006	1.97458	1
FIG124585: Hypothetical protein	1	1	2.00006	1.97458	1
Glycosyltransferase PglI (EC 2.4.1.-)	1	1	2.00006	1.97458	1
Heterodisulfide reductase, cytochrome reductase subunit	1	1	2.00006	1.97458	1
Iron-sulfur cluster assembly scaffold protein NifU	1	1	2.00006	1.97458	1
L-Cystine ABC transporter, permease protein TcyM	1	1	2.00006	1.97458	1
Lipoate-protein ligase A type 2	1	1	2.00006	1.97458	1
Low G+C gram positive nudix hydrolase YtkD (EC 3.6.-.-)	1	1	2.00006	1.97458	1
Magnesium chelatase, subunit ChlI (EC 6.6.1.1)	1	1	2.00006	1.97458	1
Maleylpyruvate isomerase, mycothiol-dependent (EC 5.2.1.4)	1	1	2.00006	1.97458	1
N-acylamino acid racemase	1	1	2.00006	1.97458	1
Nitrogen-fixing NifU domain protein	1	1	2.00006	1.97458	1
NrtR-regulated hypothetical NrtX, Band 7 protein domain	1	1	2.00006	1.97458	1
OpgC protein	1	1	2.00006	1.97458	1
Peroxide stress regulator	1	1	2.00006	1.97458	1
Phage peptidoglycan binding endopeptidase	1	1	2.00006	1.97458	1
Phosphosugar-binding transcriptional repressor, RpiR family	1	1	2.00006	1.97458	1
Phosphosulfolactate synthase (EC 4.4.1.19)	1	1	2.00006	1.97458	1
Photosystem II CP47 protein (PsbB)	1	1	2.00006	1.97458	1
Polypeptide composition of the spore coat protein CotJB	1	1	2.00006	1.97458	1
Polysaccharide biosynthesis protein CpsM(V)	1	1	2.00006	1.97458	1
Precorrin-6A synthase (EC 2.1.1.152)	1	1	2.00006	1.97458	1
Predicted L-rhamnose mutarotase	1	1	2.00006	1.97458	1
Predicted molybdate-responsive regulator YvgK in bacilli	1	1	2.00006	1.97458	1
Predicted nucleoside ABC transporter, permease 2 component	1	1	2.00006	1.97458	1
Proline racemase (EC 5.1.1.4)	1	1	2.00006	1.97458	1
Protein of unknown function DUF1009 clustered with KDO2-Lipid A biosynthesis genes	1	1	2.00006	1.97458	1
Protoporphyrin IX Mg-chelatase subunit D (EC 6.6.1.1)	1	1	2.00006	1.97458	1
Pup ligase PafA' paralog, possible component of postulated heterodimer PafA-PafA'	1	1	2.00006	1.97458	1
Putative cyclic di-GMP phosphodiesterase, EAL domain protein	1	1	2.00006	1.97458	1
putative facilitator of salicylate uptake	1	1	2.00006	1.97458	1
putative GTP pyrophosphokinase	1	1	2.00006	1.97458	1
Putative pheromone cAM373 precursor lipoprotein CamS	1	1	2.00006	1.97458	1
response regulator DrrA	1	1	2.00006	1.97458	1
SAM-dependent methlytransferase UbiG	1	1	2.00006	1.97458	1
Sensor histidine kinase LiaS	1	1	2.00006	1.97458	1
Small acid-soluble spore protein, beta-type SASP	1	1	2.00006	1.97458	1
Spore coat protein S	1	1	2.00006	1.97458	1
Toluene-4-monooxygenase, subunit TmoF	1	1	2.00006	1.97458	1
Transcriptional regulator DegU, LuxR family	1	1	2.00006	1.97458	1
Two-component sensor histidine kinase, controling glutamine utilization	1	1	2.00006	1.97458	1
Two-component sensor kinase YvcQ	1	1	2.00006	1.97458	1
UDP-glucuronate 5'-epimerase (EC 5.1.3.12)	1	1	2.00006	1.97458	1
Zn-dependent hydrolase, RNA-metabolising	1	1	2.00006	1.97458	1
ACT-domain-containing protein, predicted allosteric regulator of homoserine dehydrogenase	2	2	2.00006	1.8551	0.604938
Alpha-glucoside transport ATP-binding protein AglK	2	2	2.00006	1.8551	0.604938
DNA sulfur modification protein DndB	2	2	2.00006	1.8551	0.604938
Glutamine synthetase, clostridia type (EC 6.3.1.2)	2	2	2.00006	1.8551	0.604938
Glyceraldehyde-3-phosphate dehydrogenase (EC 1.2.1.12) (GAPDH)	2	2	2.00006	1.8551	0.604938
HemX protein, negative effector of steady-state concentration of glutamyl-tRNA reductase	2	2	2.00006	1.8551	0.604938
Hypothetical succinate dehydrogenase membrane anhor protein	2	2	2.00006	1.8551	0.604938
Lactacin F ABC transporter permease component	2	2	2.00006	1.8551	0.604938
Major facilitator superfamily (MFS) transporter	2	2	2.00006	1.8551	0.604938
OpcA, an allosteric effector of glucose-6-phosphate dehydrogenase, actinobacterial	2	2	2.00006	1.8551	0.604938
Phage baseplate assembly protein W	2	2	2.00006	1.8551	0.604938
Predicted nicotinate-regulated transporter BH3254	2	2	2.00006	1.8551	0.604938
Pyridoxine 4-oxidase (EC 1.1.3.12)	2	2	2.00006	1.8551	0.604938
Quinate/shikimate 5-dehydrogenase I delta (EC 1.1.1.25)	2	2	2.00006	1.8551	0.604938
Transcriptional regulatory protein qseB	2	2	2.00006	1.8551	0.604938
tungsten-containing formate dehydrogenase alpha subunit	2	2	2.00006	1.8551	0.604938
Methionyl-tRNA synthetase-related protein	3	3	2.00006	1.73219	0.407408
N-acetylhexosamine 1-kinase	3	3	2.00006	1.73219	0.407408
benzoate degradation ring-cleavage hydrolase	4	4	2.00006	1.62755	0.45374
carbon monoxide dehydrogenase G protein	4	4	2.00006	1.62755	0.45374
Possible alpha-xyloside ABC transporter, permease component	4	4	2.00006	1.62755	0.45374
beta-lactamase-like	5	5	2.00006	1.53978	0.317176
Carbon monoxide dehydrogenase small chain (EC 1.2.99.2)	5	5	2.00006	1.53978	0.317176
Phage ssDNA binding protein	5	5	2.00006	1.53978	0.317176
Transmembrane regulator protein PrtR	6	6	2.00006	1.46539	0.231674
KH domain RNA binding protein YlqC	7	7	2.00006	1.40144	0.254793
Lon-like protease with PDZ domain	7	7	2.00006	1.40144	0.254793
Thiol-activated cytolysin	11	11	2.00006	1.21373	0.113793
Two-component sensor kinase YesM (EC 2.7.3.-)	11	11	2.00006	1.21373	0.113793
N-Acetyl-D-glucosamine ABC transport system, permease protein 2	12	12	2.00006	1.17823	0.0875592
FIG033266: Phage DNA binding protein	13	13	2.00006	1.14591	0.0940349
Copper metallochaperone, bacterial analog of Cox17 protein	16	16	2.00006	1.06376	0.0592105
Thiol:disulfide interchange protein DsbG precursor	26	26	2.00006	0.884209	0.0175391
Cobalamin biosynthesis protein CbiG	30	30	2.00006	0.835188	0.00872056
Succinate dehydrogenase cytochrome b-556 subunit	39	39	2.00006	0.750362	0.00250494
Acetate kinase (EC 2.7.2.1)	114	115	1.98267	0.466107	3.42652e-07
Cytochrome d ubiquinol oxidase subunit II (EC 1.10.3.-)	81	85	1.90596	0.517766	4.70471e-05
Cytochrome c oxidase subunit CcoO (EC 1.9.3.1)	20	21	1.90484	0.925209	0.0457001
Glyoxylate reductase (EC 1.1.1.26)	40	42	1.90484	0.700943	0.0045939
TonB-dependent receptor	909	961	1.89185	0.166198	4.02937e-42
Alpha-1,3-N-acetylgalactosamine transferase PglA (EC 2.4.1.-)	17	18	1.88896	0.974259	0.071505
Anthranilate synthase, aminase component (EC 4.1.3.27)	149	158	1.88615	0.388533	3.97831e-08
D-lactate dehydrogenase (EC 1.1.1.28)	79	84	1.88103	0.515335	8.20925e-05
GTP pyrophosphokinase (EC 2.7.6.5)	15	16	1.87508	1.0116	0.0866229
Prophage Clp protease-like protein	30	32	1.87508	0.774456	0.0149092
Cytochrome oxidase biogenesis protein Sco1/SenC/PrrC, putative copper metallochaperone	14	15	1.86675	1.03194	0.113297
Predicted ATPase related to phosphate starvation-inducible protein PhoH	26	28	1.85722	0.811105	0.0292476
Universal stress protein family 4	12	13	1.84624	1.07627	0.137992
Neopullulanase (EC 3.2.1.135)	24	26	1.84624	0.831461	0.0348943
Phosphonate ABC transporter ATP-binding protein (TC 3.A.1.9.1)	51	56	1.82151	0.600023	0.00273908
Carboxynorspermidine decarboxylase, putative (EC 4.1.1.-)	10	11	1.81827	1.12602	0.170941
NAD-reducing hydrogenase subunit HoxF (EC 1.12.1.2)	18	20	1.80009	0.902371	0.0839272
Acetoacetyl-CoA reductase (EC 1.1.1.36)	16	18	1.77784	0.929739	0.101817
RhlB, TDP-rhamnosyltransferase 1 (EC 2.4.1.-)	8	9	1.77784	1.18103	0.302276
Hydrolase (HAD superfamily) in cluster with DUF1447	15	17	1.76476	0.944143	0.132043
Lactoylglutathione lyase (EC 4.4.1.5)	82	93	1.7635	0.469319	0.000211525
Cobalt-precorrin-8x methylmutase (EC 5.4.1.2)	20	23	1.73918	0.83323	0.0753203
Dihydrolipoamide acetyltransferase component (E2) of acetoin dehydrogenase complex (EC 2.3.1.-)	20	23	1.73918	0.83323	0.0753203
Succinate dehydrogenase hydrophobic membrane anchor protein	33	38	1.7369	0.681229	0.0229912
Hydrogen peroxide-inducible genes activator	80	93	1.72048	0.460792	0.000486965
Outer membrane receptor proteins, mostly Fe transport	103	120	1.71672	0.410424	8.45964e-05
Ornithine aminotransferase (EC 2.6.1.13)	12	14	1.71434	0.990031	0.210554
low-specificity D-threonine aldolase	6	7	1.71434	1.23838	0.380038
Adenine phosphoribosyltransferase (EC 2.4.2.7)	51	60	1.70005	0.55311	0.0063236
Adenine-specific methyltransferase (EC 2.1.1.72)	62	73	1.69868	0.507729	0.00249215
AmpG permease	95	112	1.69648	0.419667	0.000209172
Alfa-L-rhamnosidase (EC 3.2.1.40)	37	44	1.68186	0.625723	0.0244434
SSU ribosomal protein S1p	89	106	1.67929	0.426906	0.000441745
DNA topoisomerase III, Burkholderia type (EC 5.99.1.2)	10	12	1.66671	1.02171	0.2593
Domain often clustered or fused with uracil-DNA glycosylase	10	12	1.66671	1.02171	0.2593
Regulatory protein SusR	10	12	1.66671	1.02171	0.2593
Negative regulator of genetic competence MecA	5	6	1.66671	1.26435	0.523106
Putative periplasmic cytochrome type-C oxidoreductase signal peptide protein (EC 1.-.-.-)	5	6	1.66671	1.26435	0.523106
Pyridine nucleotide-disulphide oxidoreductase associated with reductive pyrimidine catabolism	5	6	1.66671	1.26435	0.523106
RNA polymerase sporulation specific sigma factor SigK	5	6	1.66671	1.26435	0.523106
DNA primase (EC 2.7.7.-)	169	203	1.66507	0.315649	1.49913e-06
Ferroxidase (EC 1.16.3.1)	44	53	1.66042	0.573065	0.0172646
Non-specific DNA-binding protein Dps	44	53	1.66042	0.573065	0.0172646
LysR family transcriptional regulator STM3121	39	47	1.65962	0.602636	0.0217893
Translation elongation factor G-related protein	19	23	1.65222	0.801373	0.104333
Hypothetical radical SAM family enzyme, NOT coproporphyrinogen III oxidase, oxygen-independent	9	11	1.6364	1.03706	0.342055
L-rhamnose operon regulatory protein RhaS	22	27	1.62967	0.745127	0.0957013
Agglutination protein	13	16	1.62504	0.905985	0.23616
Undecaprenyl-phosphate galactosephosphotransferase (EC 2.7.8.6)	25	31	1.61294	0.699906	0.08803
Benzoate 1,2-dioxygenase alpha subunit (EC 1.14.12.10)	16	20	1.60004	0.824747	0.160793
FIG017723: Putative cI prophage repressor protein	16	20	1.60004	0.824747	0.160793
Glutaredoxin 1	16	20	1.60004	0.824747	0.160793
D-xylose proton-symporter XylE	12	15	1.60004	0.916217	0.225666
Peptidase M23B precursor	12	15	1.60004	0.916217	0.225666
Meso-diaminopimelate D-dehydrogenase (EC 1.4.1.16)	8	10	1.60004	1.0513	0.324923
ATP-dependent DNA helicase SCO5184	4	5	1.60004	1.28254	0.49276
Prephenate and/or arogenate dehydrogenase (unknown specificity) (EC 1.3.1.12)(EC 1.3.1.43)	4	5	1.60004	1.28254	0.49276
Prephenate dehydrogenase (EC 1.3.1.12)	4	5	1.60004	1.28254	0.49276
Vibrioferrin decarboxylase protein PvsE	4	5	1.60004	1.28254	0.49276
Xanthine/uracil transporter	4	5	1.60004	1.28254	0.49276
Type I restriction-modification system, specificity subunit S (EC 3.1.21.3)	78	98	1.59188	0.425019	0.00296554
Transport ATP-binding protein CydC	100	126	1.58734	0.378951	0.000677048
ABC transporter ATP-binding protein YvcR	34	43	1.58143	0.603392	0.0524875
Outer membrane component of tripartite multidrug resistance system	70	90	1.55559	0.433963	0.00706632
Na(+)-translocating NADH-quinone reductase subunit D (EC 1.6.5.-)	21	27	1.55559	0.719541	0.128246
Phage integrase	170	220	1.54549	0.287958	2.62035e-05
Transport ATP-binding protein CydD	63	82	1.53662	0.448094	0.0133124
Regulatory sensor-transducer, BlaR1/MecR1 family	23	30	1.53337	0.682795	0.144216
Transcriptional regulator, LysR family	657	867	1.51561	0.148371	2.48201e-15
4'-phosphopantetheinyl transferase (EC 2.7.8.-)	28	37	1.51355	0.621388	0.113603
FIG002261: Cytochrome c family protein	12	16	1.50004	0.852363	0.317285
2-hydroxymuconic semialdehyde hydrolase (EC 3.7.1.9)	3	4	1.50004	1.28032	0.692729
3'-phosphoadenosine 5'-phosphosulfate sulfurtransferase DndC	3	4	1.50004	1.28032	0.692729
ABC-type tungstate transport system, permease protein	3	4	1.50004	1.28032	0.692729
Acetyl-CoA synthase corrinoid iron-sulfur protein, small subunit	3	4	1.50004	1.28032	0.692729
CBS domain protein, lmo1865 homolog	3	4	1.50004	1.28032	0.692729
DNA-binding response regulator ResD	3	4	1.50004	1.28032	0.692729
FIGfam005179	3	4	1.50004	1.28032	0.692729
Iron-sulfur cluster assembly scaffold protein IscU/NifU-like	3	4	1.50004	1.28032	0.692729
L-arabinolactonase (EC 3.1.1.15)	3	4	1.50004	1.28032	0.692729
Methylmalonyl-CoA epimerase (EC 5.1.99.1)	3	4	1.50004	1.28032	0.692729
Similar to eukaryotic Peptidyl prolyl 4-hydroxylase, alpha subunit (EC 1.14.11.2)	3	4	1.50004	1.28032	0.692729
Type III restriction-modification system StyLTI enzyme res (EC 3.1.21.5)	3	4	1.50004	1.28032	0.692729
Cytochrome c oxidase subunit CcoN (EC 1.9.3.1)	37	50	1.48004	0.53946	0.0872321
Iron(III) dicitrate transport system permease protein FecD (TC 3.A.1.14.1)	59	80	1.47504	0.439653	0.0245381
Transcriptional repressor of the lac operon	28	38	1.47373	0.602654	0.118932
Na(+)-translocating NADH-quinone reductase subunit B (EC 1.6.5.-)	33	45	1.46671	0.560037	0.0940599
Cobyrinic acid A,C-diamide synthase	22	30	1.46671	0.660598	0.185896
Cytochrome c oxidase polypeptide III (EC 1.9.3.1)	11	15	1.46671	0.85738	0.405128
TPR domain protein, putative component of TonB system	11	15	1.46671	0.85738	0.405128
Error-prone repair protein UmuD	19	26	1.46158	0.697018	0.208878
dicarboxylic acid transporter PcaT	8	11	1.45459	0.946685	0.46727
RND efflux system, membrane fusion protein CmeA	98	135	1.45189	0.344225	0.00539386
UPF0265 protein YeeX	21	29	1.44832	0.663273	0.229441
Dipeptidyl carboxypeptidase Dcp (EC 3.4.15.5)	53	74	1.43248	0.445265	0.0481253
Nitrate ABC transporter, ATP-binding protein	10	14	1.42862	0.860923	0.392085
Polysialic acid transport protein KpsD precursor	5	7	1.42862	1.0711	0.549601
RelB protein (antitoxin to RelE)	5	7	1.42862	1.0711	0.549601
Galactoside O-acetyltransferase (EC 2.3.1.18)	17	24	1.41671	0.702402	0.319808
Phage major capsid protein	77	109	1.41289	0.371605	0.0238017
Fructose-bisphosphate aldolase class I (EC 4.1.2.13)	31	44	1.40914	0.548952	0.143272
Recombination inhibitory protein MutS2	28	40	1.40005	0.568282	0.197758
Cytochrome O ubiquinol oxidase subunit IV (EC 1.10.3.-)	21	30	1.40005	0.638237	0.237447
Putative glycosyl hydrolase of unknown function (DUF1680)	25	36	1.38894	0.589781	0.221957
2-hydroxy-6-oxo-6-phenylhexa-2,4-dienoate hydrolase (EC 3.7.1.-)	9	13	1.38466	0.862307	0.499142
POTASSIUM/PROTON ANTIPORTER ROSB	41	60	1.36672	0.471091	0.139025
Na(+)-translocating NADH-quinone reductase subunit A (EC 1.6.5.-)	31	46	1.34788	0.521701	0.226292
Flavodoxin 1	20	30	1.33328	0.615641	0.367866
Cobalt-precorrin-6y C15-methyltransferase [decarboxylating] (EC 2.1.1.-)	14	21	1.33328	0.706182	0.473286
Tryptophan synthase beta chain like (EC 4.2.1.20)	12	18	1.33328	0.747448	0.442913
Phosphoenolpyruvate carboxykinase [GTP] (EC 4.1.1.32)	10	15	1.33328	0.79762	0.525936
ATPase component STY3232 of energizing module of queuosine-regulated ECF transporter	8	12	1.33328	0.86052	0.635739
ErfK/YbiS/YcfS/YnhG family protein	8	12	1.33328	0.86052	0.635739
COG2740: Predicted nucleic-acid-binding protein implicated in transcription termination	6	9	1.33328	0.942764	0.590866
CO dehydrogenase/acetyl-CoA synthase, acetyl-CoA synthase subunit (EC 2.3.1.169)	4	6	1.33328	1.05654	0.739876
Lactose phosphotransferase system repressor	4	6	1.33328	1.05654	0.739876
Rrf2 family transcriptional regulator	4	6	1.33328	1.05654	0.739876
Siderophore staphylobactin biosynthesis protein SbnF	4	6	1.33328	1.05654	0.739876
Beta-carotene ketolase (EC 1.14.-.-)	2	3	1.33328	1.22189	1
Butyrate kinase (EC 2.7.2.7)	2	3	1.33328	1.22189	1
Collagen alpha 1(I) chain precursor	2	3	1.33328	1.22189	1
CRISPR-associated protein, Csm1 family	2	3	1.33328	1.22189	1
Duplicated ATPase component CbrU of energizing module of predicted cobalamin ECF transporter	2	3	1.33328	1.22189	1
Flp pilus assembly protein, pilin Flp	2	3	1.33328	1.22189	1
L-Cystine ABC transporter, periplasmic cystine-binding protein TcyA	2	3	1.33328	1.22189	1
Novel D-mannonate dehydrogenase (EC 1.1.1.57)	2	3	1.33328	1.22189	1
Nucleotide excision repair protein, with UvrB/UvrC motif	2	3	1.33328	1.22189	1
Parvulin-like peptidyl-prolyl isomerase	2	3	1.33328	1.22189	1
Penicillin-binding protein 3	2	3	1.33328	1.22189	1
Possible fucose ABC transporter, substrate-binding component	2	3	1.33328	1.22189	1
Predicted transcriptional regulator for fatty acid degradation FadP, TetR family	2	3	1.33328	1.22189	1
Propanediol utilization protein PduM	2	3	1.33328	1.22189	1
Pup ligase PafA, possible component of postulated heterodimer PafA-PafA'	2	3	1.33328	1.22189	1
Pyrimidine ABC transporter, substrate-binding component	2	3	1.33328	1.22189	1
RNA polymerase sigma-70 factor, ECF family	2	3	1.33328	1.22189	1
Serine-protein kinase rsbW (EC 2.7.11.1)	2	3	1.33328	1.22189	1
toluenesulfonate zinc-independent alcohol dehydrogenase	2	3	1.33328	1.22189	1
Cytochrome c-type biogenesis protein CcmG/DsbE, thiol:disulfide oxidoreductase	29	44	1.31813	0.522797	0.264215
Histone acetyltransferase HPA2 and related acetyltransferases	104	159	1.30813	0.296481	0.0361784
ABC-type Fe3+-siderophore transport system, permease 2 component	13	20	1.29996	0.705712	0.464047
Vitamin B12 ABC transporter, permease component BtuC	57	88	1.29541	0.383826	0.13434
N-succinyl-L,L-diaminopimelate aminotransferase alternative (EC 2.6.1.17)	11	17	1.29408	0.74617	0.548864
Cardiolipin synthetase (EC 2.7.8.-)	130	202	1.28709	0.262642	0.0268335
FIG137478: Hypothetical protein	9	14	1.28567	0.7948	0.658673
XdhC protein (assists in molybdopterin insertion into xanthine dehydrogenase)	9	14	1.28567	0.7948	0.658673
Two-component response regulator	68	106	1.28298	0.351059	0.108422
tolB protein precursor, periplasmic protein involved in the tonb-independent uptake of group A colicins	59	92	1.28257	0.373719	0.142333
PF00070 family, FAD-dependent NAD(P)-disulphide oxidoreductase	37	58	1.27582	0.454745	0.276198
Cytochrome c oxidase polypeptide I (EC 1.9.3.1)	14	22	1.27269	0.67049	0.482974
RND efflux system, outer membrane lipoprotein CmeC	78	123	1.26826	0.325802	0.100305
4-hydroxy-2-oxovalerate aldolase (EC 4.1.3.39)	12	19	1.26312	0.703956	0.568769
Geranylgeranyl pyrophosphate synthetase (EC 2.5.1.29)	52	83	1.25298	0.384581	0.202211
Excinuclease ABC subunit B	97	155	1.25158	0.290708	0.0945214
Preprotein translocase subunit YajC (TC 3.A.5.1.1)	35	56	1.24997	0.454816	0.317287
Enoyl-[acyl-carrier-protein] reductase [FMN] (EC 1.3.1.9)	30	48	1.24997	0.485259	0.338443
Cobalt-precorrin-2 C20-methyltransferase (EC 2.1.1.130)	10	16	1.24997	0.742889	0.677759
Coenzyme PQQ synthesis protein B	5	8	1.24997	0.928218	0.770384
Glucose-methanol-choline (GMC) oxidoreductase:NAD binding site	5	8	1.24997	0.928218	0.770384
Protoporphyrinogen IX oxidase, aerobic, HemY (EC 1.3.3.4)	5	8	1.24997	0.928218	0.770384
Transcriptional regulator, MecI family	5	8	1.24997	0.928218	0.770384
Tol biopolymer transport system, TolR protein	24	39	1.23074	0.522735	0.424781
ABC-type Fe3+-siderophore transport system, permease component	16	26	1.23074	0.613923	0.515552
Gluconate permease, Bsu4004 homolog	8	13	1.23074	0.788533	0.647881
Rubrerythrin	8	13	1.23074	0.788533	0.647881
Putative glycosyltransferase	27	44	1.22725	0.496482	0.450035
Pullulanase (EC 3.2.1.41)	17	28	1.21426	0.590727	0.529708
YbbM seven transmembrane helix protein	17	28	1.21426	0.590727	0.529708
Cytochrome d ubiquinol oxidase subunit I (EC 1.10.3.-)	74	122	1.21309	0.31686	0.197818
Acetyl-coenzyme A carboxyl transferase alpha chain (EC 6.4.1.2)	40	66	1.2121	0.414843	0.354111
4-hydroxyphenylpyruvate dioxygenase (EC 1.13.11.27)	23	38	1.21051	0.52201	0.4977
Multi antimicrobial extrusion protein (Na(+)/drug antiporter), MATE family of MDR efflux pumps	116	192	1.20831	0.257172	0.115876
Carbon-monoxide dehydrogenase form II, large subunit (EC 1.2.99.2)	6	10	1.19998	0.841541	0.792185
Cytochrome c-type biogenesis protein CcsA/ResC	6	10	1.19998	0.841541	0.792185
D(-)-3-hydroxybutyrate oligomer hydrolase (EC 3.1.1.22)	6	10	1.19998	0.841541	0.792185
Putative dihydroxyacetone kinase (EC 2.7.1.29), ADP-binding subunit	6	10	1.19998	0.841541	0.792185
Glycosyltransferase involved in cell wall biogenesis (EC 2.4.-.-)	3	5	1.19998	1.01363	1
Hypothetical protein PA1329	3	5	1.19998	1.01363	1
Integral membrane protein CcmA involved in cell shape determination	3	5	1.19998	1.01363	1
MreB-like protein (Mbl protein)	3	5	1.19998	1.01363	1
rna synthesis, modification , dna transcription	3	5	1.19998	1.01363	1
tungsten-containing formate dehydrogenase beta subunit	3	5	1.19998	1.01363	1
Ribonucleotide reductase of class II (coenzyme B12-dependent) (EC 1.17.4.1)	13	22	1.1818	0.634921	0.720176
ATP phosphoribosyltransferase regulatory subunit (EC 2.4.2.17)	10	17	1.17646	0.695055	0.68624
Flagellar biosynthesis protein FlhF	10	17	1.17646	0.695055	0.68624
Protocatechuate 3,4-dioxygenase alpha chain (EC 1.13.11.3)	7	12	1.16665	0.777498	0.808763
Sensor protein basS/pmrB (EC 2.7.3.-)	36	62	1.16128	0.413308	0.520323
Lactose permease	33	57	1.15788	0.427447	0.503684
Type I restriction-modification system, restriction subunit R (EC 3.1.21.3)	74	128	1.15624	0.2998	0.332068
Outer membrane protein H precursor	28	49	1.14285	0.451243	0.628831
Cytochrome c oxidase polypeptide II (EC 1.9.3.1)	8	14	1.14285	0.727458	0.821916
General secretion pathway protein N	4	7	1.14285	0.897518	1
Lipid A 3-O-deacylase	4	7	1.14285	0.897518	1
Nitrilase (EC 3.5.5.1)	4	7	1.14285	0.897518	1
S-adenosylmethionine decarboxylase proenzyme (EC 4.1.1.50), prokaryotic class 1B	4	7	1.14285	0.897518	1
Peptide methionine sulfoxide reductase MsrA (EC 1.8.4.11)	41	72	1.13888	0.382335	0.549406
Multiple sugar ABC transporter, substrate-binding protein	23	41	1.12195	0.479271	0.69125
General secretion pathway protein D	65	116	1.12068	0.306587	0.478141
FIG146518: Zn-dependent hydrolases, including glyoxylases	14	25	1.11999	0.5818	0.735968
NADH-ubiquinone oxidoreductase chain I (EC 1.6.5.3)	35	63	1.11111	0.397871	0.668303
Two-component system response regulator QseB	30	54	1.11111	0.424705	0.644553
Lipid carrier : UDP-N-acetylgalactosaminyltransferase (EC 2.4.1.-)	20	36	1.11111	0.501652	0.776951
Ferric enterobactin transport ATP-binding protein FepC (TC 3.A.1.14.2)	15	27	1.11111	0.561683	0.745105
Potassium voltage-gated channel subfamily KQT	10	18	1.11111	0.652883	0.841706
FIG001802: Putative alkaline-shock protein	5	9	1.11111	0.818588	1
FIG005666: putative helicase	5	9	1.11111	0.818588	1
N-acetylmannosamine kinase (EC 2.7.1.60)	32	58	1.10344	0.410104	0.65574
Two-component system histidine kinase	11	20	1.1	0.623948	0.849411
macromolecule metabolism	83	151	1.09933	0.268674	0.488557
Phosphoanhydride phosphohydrolase (EC 3.1.3.2) (pH 2.5 acid phosphatase) (AP)	23	42	1.09524	0.466521	0.79257
Two-component sensor PilS	6	11	1.09091	0.759636	1
Magnesium and cobalt transport protein CorA	65	120	1.08333	0.294961	0.63987
Phosphonate ABC transporter permease protein phnE2 (TC 3.A.1.9.1)	13	24	1.08333	0.576757	0.861953
Colicin V production protein	34	63	1.07936	0.389859	0.746871
Putative arylsulfatase regulatory protein	14	26	1.07692	0.557171	0.867153
Cytochrome c oxidase subunit CcoP (EC 1.9.3.1)	7	13	1.07692	0.713097	1
Two-component sensor kinase yesM (EC 2.7.3.-), associated with MetSO reductase	7	13	1.07692	0.713097	1
Ureidoglycolate dehydrogenase (EC 1.1.1.154)	7	13	1.07692	0.713097	1
macromolecule synthesis, modification	36	67	1.07463	0.378589	0.754095
L-proline glycine betaine ABC transport system permease protein ProV (TC 3.A.1.12.1)	47	88	1.06818	0.33502	0.715565
Amidases related to nicotinamidase	16	30	1.06667	0.523616	0.876003
Phenylacetate-coenzyme A ligase (EC 6.2.1.30)	16	30	1.06667	0.523616	0.876003
Serine/threonine protein kinase PrkC, regulator of stationary phase	16	30	1.06667	0.523616	0.876003
Urea carboxylase-related ABC transporter, ATPase protein	8	15	1.06667	0.675008	1
Protein-export membrane protein SecD (TC 3.A.5.1.1)	73	137	1.06569	0.274776	0.660951
putative 3-hydroxyphenylpropionic acid porine	9	17	1.05882	0.642946	1
3,4-dihydroxy-2-butanone 4-phosphate synthase (EC 4.1.99.12)	37	70	1.05714	0.367296	0.837562
Branched-chain amino acid ABC transporter, amino acid-binding protein (TC 3.A.1.4.1)	40	76	1.05263	0.353448	0.843901
Phage outer membrane lytic protein Rz	10	19	1.05263	0.615444	1
Cobalt-zinc-cadmium resistance protein	53	101	1.0495	0.311499	0.797746
1-hydroxy-2-methyl-2-(E)-butenyl 4-diphosphate synthase (EC 1.17.7.1)	43	82	1.04878	0.341125	0.849552
Peptidoglycan-associated lipoprotein precursor	24	46	1.04347	0.434283	0.899264
Crossover junction endodeoxyribonuclease RuvC (EC 3.1.22.4)	26	50	1.03998	0.418571	0.903291
Alkaline phosphatase (EC 3.1.3.1)	61	118	1.03387	0.287669	0.874034
Translation initiation factor 1	34	66	1.03033	0.36998	0.915612
Arylsulfatase (EC 3.1.6.1)	63	123	1.02441	0.280632	0.876572
integral membrane sensor signal transduction histidine kinase	23	45	1.02224	0.431909	1
Cytochrome O ubiquinol oxidase subunit II (EC 1.10.3.-)	31	61	1.0164	0.378973	1
Permease of the drug/metabolite transporter (DMT) superfamily	230	453	1.01546	0.152881	0.870993
2-hydroxymuconic semialdehyde hydrolase (EC 3.1.1.-)	1	2	1	0.983045	1
4,4'-diaponeurosporenoate glycosyltransferase (EC 2.4.1.-)	1	2	1	0.983045	1
5-aminolevulinate synthase (EC 2.3.1.37)	2	4	1	0.909561	1
Acetyl-CoA:Cys-GlcN-Ins acetyltransferase, mycothiol synthase MshD	1	2	1	0.983045	1
Acyl carrier protein phosphodiesterase (EC 3.1.4.14)	12	24	1	0.544339	1
Arginine decarboxylase (EC 4.1.1.19)	15	30	1	0.499976	1
Aromatic-ring-hydroxylating dioxygenase, beta subunit	1	2	1	0.983045	1
ATP-dependent Clp protease adaptor protein ClpS	22	44	1	0.429189	1
ATP/GTP-binding protein, SA1392 homolog	3	6	1	0.838187	1
Benzoyl-CoA reductase subunit BadE (EC 1.3.99.15)	1	2	1	0.983045	1
Capsular polysaccharide synthesis enzyme Cap5F	3	6	1	0.838187	1
carbon monoxide dehydrogenase D protein	1	2	1	0.983045	1
carbon monoxide dehydrogenase E protein	4	8	1	0.779639	1
Carbon monoxide dehydrogenase F protein	2	4	1	0.909561	1
Carbon monoxide dehydrogenase large chain (EC 1.2.99.2)	1	2	1	0.983045	1
Catechol 2,3-dioxygenase (EC 1.13.11.2)	1	2	1	0.983045	1
Chitin binding protein	5	10	1	0.731821	1
Coenzyme PQQ synthesis protein F (EC 3.4.99.-)	5	10	1	0.731821	1
Copper-containing nitrite reductase (EC 1.7.2.1)	3	6	1	0.838187	1
Cyclic beta-1,2-glucan modification transmembrane protein	1	2	1	0.983045	1
Cytochrome c-type biogenesis protein DsbD, protein-disulfide reductase (EC 1.8.1.8)	53	106	1	0.294895	1
D-amino acid dehydrogenase (EC 1.4.99.1) family protein in hydroxy-L-proline catabolic cluster	1	2	1	0.983045	1
Dipicolinate synthase subunit B	1	2	1	0.983045	1
Dissimilatory sulfite reductase (desulfoviridin), alpha and beta subunits	1	2	1	0.983045	1
DUF324 domain-containing protein	1	2	1	0.983045	1
Export ABC transporter ATP-binding protein	1	2	1	0.983045	1
FAD-dependent monooxygenase PhzS	1	2	1	0.983045	1
GDSL-like lipase/acylhydrolase	1	2	1	0.983045	1
Glucokinase (EC 2.7.1.2)	40	80	1	0.333583	1
Heme oxygenase HemO, associated with heme uptake	2	4	1	0.909561	1
His repressor	2	4	1	0.909561	1
Holo-[acyl-carrier protein] synthase, alternative (EC 2.7.8.7)	2	4	1	0.909561	1
Inner membrane protein forms channel for type IV secretion of T-DNA complex (VirB8)	2	4	1	0.909561	1
Iron-dependent repressor IdeR/DtxR	1	2	1	0.983045	1
L-Cystine ABC transporter, periplasmic cystine-binding protein TcyK	1	2	1	0.983045	1
Lacto-N-biose phosphorylase (EC 2.4.1.211)	1	2	1	0.983045	1
Multidrug resistance protein [function not yet clear]	1	2	1	0.983045	1
N-acetyl-1-D-myo-inosityl-2-amino-2-deoxy-alpha-D-glucopyranoside deacetylase MshB	1	2	1	0.983045	1
N-acetylornithine carbamoyltransferase (EC 2.1.3.9)	2	4	1	0.909561	1
N-carbamoylsarcosine amidase (EC 3.5.1.59)	1	2	1	0.983045	1
Nitrate ABC transporter, permease protein	5	10	1	0.731821	1
Osmotically activated L-carnitine/choline ABC transporter, permease protein OpuCD	1	2	1	0.983045	1
Phenylalanine hydroxylase transcriptional activator PhhR	1	2	1	0.983045	1
Phosphonopyruvate decarboxylase (EC 4.1.1.82)	1	2	1	0.983045	1
Phosphoribosylformylglycinamidine synthase, PurS subunit (EC 6.3.5.3)	3	6	1	0.838187	1
Predicted gluconate TRAP family transporter, DctM subunit	1	2	1	0.983045	1
Predicted membrane fusion protein (MFP) component of efflux pump, membrane anchor protein YbhG	28	56	1	0.38842	1
Propanediol utilization polyhedral body protein PduK	2	4	1	0.909561	1
Putative iron-containing NADPH-dependent propanol dehydrogenase	2	4	1	0.909561	1
Putative TolA protein	1	2	1	0.983045	1
ribosomal protein L7Ae family protein	5	10	1	0.731821	1
RNA polymerase sigma-70 factor	15	30	1	0.499976	1
RNA polymerase sigma-H factor AlgT	2	4	1	0.909561	1
RsbR, positive regulator of sigma-B	1	2	1	0.983045	1
RsbS, negative regulator of sigma-B	1	2	1	0.983045	1
Secreted protein, suppressor for copper-sensitivity ScsC	1	2	1	0.983045	1
Septum formation initiator	1	2	1	0.983045	1
Siderophore staphylobactin biosynthesis protein SbnE	2	4	1	0.909561	1
Siderophore staphylobactin biosynthesis protein SbnG	2	4	1	0.909561	1
Sigma-70 region 2:Sigma-70 region 4	1	2	1	0.983045	1
similar to ribulose-1,5-bisphosphate carboxylase, Type III	1	2	1	0.983045	1
Streptolysin S export transmembrane permease (SagI)	1	2	1	0.983045	1
Sulfoacetaldehyde acetyltransferase (EC 2.3.3.15)	1	2	1	0.983045	1
Teichoic acid biosynthesis protein	1	2	1	0.983045	1
Transmembrane protein MT2276, clustered with lipoate gene	1	2	1	0.983045	1
Type cbb3 cytochrome oxidase biogenesis protein CcoG, involved in Cu oxidation	9	18	1	0.604272	1
Type III secretion inner membrane protein (YscD,homologous to flagellar export components)	3	6	1	0.838187	1
Unsaturated glucuronyl hydrolase (EC 3.2.1.-)	6	12	1	0.692052	1
Uracil-DNA glycosylase family protein, clostridial type	1	2	1	0.983045	1
Urea carboxylase (EC 6.3.4.6) without Allophanate hydrolase 2 domains	1	2	1	0.983045	1
Beta-hexosaminidase (EC 3.2.1.52)	56	113	0.991148	0.284901	1
Guanine deaminase (EC 3.5.4.3)	34	69	0.9855	0.351936	1
Cobalt-precorrin-3b C17-methyltransferase	20	41	0.975588	0.43409	1
DNA mismatch repair protein MutS	88	181	0.972348	0.227384	0.846481
NADH-ubiquinone oxidoreductase chain H (EC 1.6.5.3)	34	70	0.971399	0.346287	1
Polyhydroxyalkanoic acid synthase	16	33	0.969725	0.471318	1
Arsenic efflux pump protein	32	66	0.969725	0.354719	1
Methylglyoxal synthase (EC 4.2.3.3)	24	50	0.960004	0.395787	1
Phosphoglycerate mutase (EC 5.4.2.1)	42	88	0.954546	0.30992	0.852714
Alpha-amylase (EC 3.2.1.1)	20	42	0.952381	0.422685	1
NADPH-dependent glyceraldehyde-3-phosphate dehydrogenase (EC 1.2.1.13)	10	21	0.952381	0.551924	1
Probable glutamate/gamma-aminobutyrate antiporter	18	38	0.947369	0.438426	1
Dihydrolipoamide dehydrogenase of branched-chain alpha-keto acid dehydrogenase (EC 1.8.1.4)	9	19	0.947369	0.569912	1
Xanthine phosphoribosyltransferase (EC 2.4.2.22)	9	19	0.947369	0.569912	1
Aspartyl-tRNA(Asn) amidotransferase subunit A (EC 6.3.5.6)	24	51	0.941177	0.387178	0.902654
Glutamyl-tRNA(Gln) amidotransferase subunit A (EC 6.3.5.7)	24	51	0.941177	0.387178	0.902654
Aspartate/tyrosine/aromatic aminotransferase	38	81	0.938273	0.317552	0.771602
Protein-export membrane protein SecF (TC 3.A.5.1.1)	43	92	0.934784	0.299659	0.784323
Ribosome-binding factor A	21	45	0.933335	0.405232	0.896285
Na(+)-translocating NADH-quinone reductase subunit C (EC 1.6.5.-)	14	30	0.933335	0.47605	1
ATPase component STY3233 of energizing module of queuosine-regulated ECF transporter	7	15	0.933335	0.61139	1
Chemotaxis regulator - transmits chemoreceptor signals to flagelllar motor components CheY	31	67	0.925375	0.341214	0.749314
Aminopeptidase C (EC 3.4.22.40)	12	26	0.923079	0.498767	1
2,3-dihydro-2,3-dihydroxybenzoate dehydrogenase (EC 1.3.1.28) of siderophore biosynthesis	6	13	0.923079	0.635378	1
Cytochrome oxidase biogenesis protein Surf1, facilitates heme A insertion	6	13	0.923079	0.635378	1
Inner membrane protein translocase component YidC, short form OxaI-like	6	13	0.923079	0.635378	1
Arabinose operon regulatory protein	17	37	0.918921	0.433734	0.885452
Outer membrane lipoprotein omp16 precursor	21	46	0.913046	0.395531	0.796344
Exonuclease SbcC	73	160	0.912503	0.230412	0.532588
Cytochrome c552 precursor (EC 1.7.2.2)	15	33	0.909094	0.450272	0.878586
NAD(P)H oxidoreductase YRKL (EC 1.6.99.-)	10	22	0.909094	0.524768	1
dTDP-rhamnosyl transferase RfbF (EC 2.-.-.-)	5	11	0.909094	0.66149	1
Heptaprenyl diphosphate synthase component I (EC 2.5.1.30)	5	11	0.909094	0.66149	1
NADH peroxidase (EC 1.11.1.1)	5	11	0.909094	0.66149	1
Polygalacturonase (EC 3.2.1.15)	5	11	0.909094	0.66149	1
ubiquinol cytochrome C oxidoreductase, cytochrome C1 subunit	5	11	0.909094	0.66149	1
L-proline glycine betaine binding ABC transporter protein ProX (TC 3.A.1.12.1)	34	75	0.90667	0.320624	0.685175
Beta-ureidopropionase (EC 3.5.1.6)	9	20	0.900004	0.539133	1
Rrf2 family transcriptional regulator, group III	9	20	0.900004	0.539133	1
Cytochrome c family protein	13	29	0.896556	0.468727	0.870316
Na(+)-translocating NADH-quinone reductase subunit E (EC 1.6.5.-)	17	38	0.894741	0.4212	0.775955
Fructokinase (EC 2.7.1.4)	32	72	0.888894	0.321888	0.604923
Predicted L-lactate dehydrogenase, Iron-sulfur cluster-binding subunit YkgF	28	63	0.888894	0.340682	0.657399
D-alanine aminotransferase (EC 2.6.1.21)	4	9	0.888894	0.688865	1
Duplicated ATPase component YkoD of energizing module of thiamin-regulated ECF transporter for HydroxyMethylPyrimidine	4	9	0.888894	0.688865	1
FIG139598: Potential ribosomal protein	4	9	0.888894	0.688865	1
Rhamnogalacturonide transporter RhiT	4	9	0.888894	0.688865	1
Alpha-xylosidase (EC 3.2.1.-)	31	70	0.88572	0.324986	0.599662
Glycosyl transferase, group 2 family protein	30	68	0.882359	0.328166	0.594185
Cytochrome c-type biogenesis protein CcmE, heme chaperone	15	34	0.882359	0.435832	0.76316
Trehalose synthase (EC 5.4.99.16)	15	34	0.882359	0.435832	0.76316
Serine phosphatase RsbU, regulator of sigma subunit	22	50	0.880006	0.372557	0.707991
Undecaprenyl-diphosphatase (EC 3.6.1.27)	32	73	0.876719	0.316993	0.604995
Cytochrome c-type biogenesis protein CcmD, interacts with CcmCE	13	30	0.866675	0.45173	0.747886
Nitrate ABC transporter, nitrate-binding protein	13	30	0.866675	0.45173	0.747886
Cytochrome O ubiquinol oxidase subunit I (EC 1.10.3.-)	47	109	0.862394	0.263322	0.444743
NADH-ubiquinone oxidoreductase chain J (EC 1.6.5.3)	27	63	0.857153	0.332284	0.576408
Multiple sugar ABC transporter, membrane-spanning permease protein MsmG	9	21	0.857153	0.511564	0.846982
2-Keto-D-gluconate dehydrogenase (EC 1.1.99.4), membrane-bound, flavoprotein	3	7	0.857153	0.714151	1
Chemotaxis protein CheC -- inhibitor of MCP methylation	3	7	0.857153	0.714151	1
CO dehydrogenase accessory protein CooC (nickel insertion)	3	7	0.857153	0.714151	1
Creatinine amidohydrolase (EC 3.5.2.10)	3	7	0.857153	0.714151	1
DNA repair exonuclease family protein YhaO	3	7	0.857153	0.714151	1
Malate permease	3	7	0.857153	0.714151	1
Malolactic enzyme (EC 1.-.-.-)	3	7	0.857153	0.714151	1
RNA polymerase sporulation specific sigma factor SigH	3	7	0.857153	0.714151	1
Transcriptional regulator in cluster with unspecified monosaccharide ABC transport system	3	7	0.857153	0.714151	1
3-dehydroquinate dehydratase II (EC 4.2.1.10)	14	33	0.848496	0.428986	0.646472
YcgN (Fragment)	11	26	0.846166	0.468827	0.729216
Flagellar synthesis regulator FleN	8	19	0.842118	0.523207	0.838879
NADH-ubiquinone oxidoreductase chain M (EC 1.6.5.3)	51	122	0.83608	0.245336	0.295496
4-keto-6-deoxy-N-Acetyl-D-hexosaminyl-(Lipid carrier) aminotransferase	28	67	0.835835	0.318241	0.448495
Biopolymer transport protein ExbD/TolR	35	84	0.833348	0.288314	0.383282
Type cbb3 cytochrome oxidase biogenesis protein CcoI	10	24	0.833348	0.477686	0.718177
FIG001621: Zinc protease	5	12	0.833348	0.60334	1
Phage baseplate	5	12	0.833348	0.60334	1
Probable acyl-CoA dehydrogenase (EC 1.3.99.3)	5	12	0.833348	0.60334	1
Lysophospholipase (EC 3.1.1.5)	22	53	0.830204	0.349415	0.540588
Peptide methionine sulfoxide reductase MsrB (EC 1.8.4.12)	29	70	0.828587	0.310535	0.455676
Transcription termination protein NusB	19	46	0.826104	0.369033	0.51399
FMN adenylyltransferase (EC 2.7.7.2)	28	68	0.823547	0.31306	0.448715
Riboflavin kinase (EC 2.7.1.26)	28	68	0.823547	0.31306	0.448715
Phage lysin	14	34	0.823547	0.41527	0.646579
Alpha-L-Rha alpha-1,3-L-rhamnosyltransferase (EC 2.4.1.-)	7	17	0.823547	0.534822	0.829336
ATP-dependent DNA helicase UvrD/PcrA, proteobacterial paralog	7	17	0.823547	0.534822	0.829336
Catabolite control protein A	7	17	0.823547	0.534822	0.829336
Aspartyl-tRNA(Asn) amidotransferase subunit B (EC 6.3.5.6)	16	39	0.820531	0.39245	0.568939
Glutamyl-tRNA(Gln) amidotransferase subunit B (EC 6.3.5.7)	16	39	0.820531	0.39245	0.568939
Ribonuclease J2 (endoribonuclease in RNA processing)	9	22	0.818201	0.486588	0.705667
Sodium/glycine symporter GlyP	11	27	0.814834	0.450087	0.610891
Aldehyde dehydrogenase (EC 1.2.1.3)	83	204	0.813745	0.191091	0.117625
Polymyxin resistance protein ArnT, undecaprenyl phosphate-alpha-L-Ara4N transferase	36	89	0.80901	0.27562	0.298129
UDP-N-acetylglucosamine 4,6-dehydratase (EC 4.2.1.-)	23	57	0.807039	0.332536	0.409166
Cytidylate kinase (EC 2.7.4.25)	37	92	0.804371	0.270633	0.304168
Prolyl-tRNA synthetase (EC 6.1.1.15)	43	107	0.803761	0.253217	0.260029
NADH-ubiquinone oxidoreductase chain N (EC 1.6.5.3)	40	100	0.800024	0.260025	0.244943
Monoglyceride lipase (EC 3.1.1.23)	10	25	0.800024	0.457113	0.596408
50S ribosomal subunit maturation GTPase RbgA (B. subtilis YlqF)	8	20	0.800024	0.495253	0.691327
Glutaredoxin	8	20	0.800024	0.495253	0.691327
Protocatechuate 3,4-dioxygenase beta chain (EC 1.13.11.3)	6	15	0.800024	0.545721	0.817869
Citrate lyase gamma chain, acyl carrier protein (EC 4.1.3.6)	4	10	0.800024	0.616874	1
FIG009210: peptidase, M16 family	4	10	0.800024	0.616874	1
Galactose-6-phosphate isomerase, LacA subunit (EC 5.3.1.26)	4	10	0.800024	0.616874	1
Ortho-halobenzoate 1,2-dioxygenase alpha-ISP protein OhbB	4	10	0.800024	0.616874	1
5-oxopent-3-ene-1,2,5-tricarboxylate decarboxylase.	2	5	0.800024	0.723853	1
Acetyl-CoA synthase corrinoid iron-sulfur protein, large subunit	2	5	0.800024	0.723853	1
Alpha-1,4-N-acetylgalactosamine transferase PglH (EC 2.4.1.-)	2	5	0.800024	0.723853	1
Alpha-L-arabinofuranosidase II precursor (EC 3.2.1.55)	2	5	0.800024	0.723853	1
Cell surface protein IsdA, transfers heme from hemoglobin to apo-IsdC	2	5	0.800024	0.723853	1
Glutathione S-transferase N-terminal domain protein (EC 2.5.1.18)	2	5	0.800024	0.723853	1
Metal-dependent hydrolases of the beta-lactamase superfamily III	2	5	0.800024	0.723853	1
Oligohyaluronate lyase (EC 4.2.2.-)	2	5	0.800024	0.723853	1
Phytoene dehydrogenase and related proteins	2	5	0.800024	0.723853	1
Phytoene desaturase, pro-zeta-carotene producing (EC 1.-.-.-)	2	5	0.800024	0.723853	1
Predicted nucleoside ABC transporter, substrate-binding component	2	5	0.800024	0.723853	1
Propanediol utilization polyhedral body protein PduJ	2	5	0.800024	0.723853	1
Propanediol utilization protein PduL	2	5	0.800024	0.723853	1
Putative formate dehydrogenase-specific chaperone	2	5	0.800024	0.723853	1
Putative SAM-dependent methyltransferase Bucepa02006346	2	5	0.800024	0.723853	1
RNA polymerase sporulation specific sigma factor SigF	2	5	0.800024	0.723853	1
Transmembrane component CbrV of energizing module of predicted cobalamin ECF transporter	2	5	0.800024	0.723853	1
Transmembrane component NikQ of energizing module of nickel ECF transporter	2	5	0.800024	0.723853	1
Heat shock protein 60 family chaperone GroEL	49	123	0.796773	0.236722	0.195679
Heat-inducible transcription repressor HrcA	17	43	0.790725	0.367943	0.493886
Type IV fimbrial biogenesis protein PilY1	25	64	0.78128	0.309915	0.313719
Alkyl hydroperoxide reductase protein C (EC 1.6.4.-)	16	41	0.780518	0.371668	0.482729
Pyoverdine chromophore precursor synthetase PvdL	16	41	0.780518	0.371668	0.482729
NADH ubiquinone oxidoreductase chain A (EC 1.6.5.3)	23	59	0.779631	0.320137	0.34958
DNA-3-methyladenine glycosylase (EC 3.2.2.20)	21	54	0.777748	0.331585	0.39133
NADH-ubiquinone oxidoreductase chain B (EC 1.6.5.3)	21	54	0.777748	0.331585	0.39133
Aspartyl-tRNA(Asn) synthetase (EC 6.1.1.23)	14	36	0.777748	0.39024	0.457641
Arginine-tRNA-protein transferase (EC 2.3.2.8)	7	18	0.777748	0.503168	0.674661
Zinc ABC transporter, periplasmic-binding protein ZnuA	33	85	0.776441	0.273442	0.241557
Histidine ammonia-lyase (EC 4.3.1.3)	24	62	0.774165	0.312083	0.30546
Assimilatory nitrate reductase large subunit (EC:1.7.99.4)	12	31	0.774165	0.412092	0.51981
Phenylalanyl-tRNA synthetase alpha chain (EC 6.1.1.20)	34	88	0.7727	0.26851	0.212949
Succinate dehydrogenase flavoprotein subunit (EC 1.3.99.1)	78	202	0.77225	0.185384	0.0569625
Acetyl-coenzyme A carboxyl transferase beta chain (EC 6.4.1.2)	39	101	0.77225	0.252797	0.179456
Iron-sulfur cluster assembly ATPase protein SufC	22	57	0.771902	0.32256	0.340592
Phage protein	293	761	0.770013	0.0994128	0.000128316
Foldase protein PrsA precursor (EC 5.2.1.8)	5	13	0.769204	0.554491	0.80373
tRNA-t(6)A37 methylthiotransferase	8	21	0.761881	0.470013	0.561814
Ubiquinol--cytochrome c reductase, cytochrome B subunit (EC 1.10.2.2)	8	21	0.761881	0.470013	0.561814
Ribosomal protein S12p Asp88 (E. coli) methylthiotransferase	28	74	0.756735	0.285214	0.247694
Cytidine deaminase (EC 3.5.4.5)	23	61	0.754078	0.30867	0.297429
Serine acetyltransferase (EC 2.3.1.30)	36	96	0.749981	0.253464	0.165689
Na(+)-translocating NADH-quinone reductase subunit F (EC 1.6.5.-)	21	56	0.749981	0.318653	0.278899
Phosphoheptose isomerase 1 (EC 5.3.1.-)	15	40	0.749981	0.36512	0.392291
Acetyl-CoA synthetase (ADP-forming) alpha and beta chains, putative	12	32	0.749981	0.39824	0.428958
Cobyric acid synthase (EC 6.3.5.10)	12	32	0.749981	0.39824	0.428958
Transcriptional regulatory protein basR/pmrA	9	24	0.749981	0.443187	0.58044
2-keto-3-deoxy-D-arabino-heptulosonate-7-phosphate synthase II (EC 2.5.1.54)	6	16	0.749981	0.509645	0.654963
Phage head completion-stabilization protein	6	16	0.749981	0.509645	0.654963
ABC-type tungstate transport system, ATP-binding protein	3	8	0.749981	0.621813	1
Arginine N-succinyltransferase, alpha subunit (EC 2.3.1.109)	3	8	0.749981	0.621813	1
ATPase provides energy for both assembly of type IV secretion complex and secretion of T-DNA complex (VirB4)	3	8	0.749981	0.621813	1
Erythritol transcriptional regulator EryD	3	8	0.749981	0.621813	1
FIG054316: Phage polarity suppression protein	3	8	0.749981	0.621813	1
Lignostilbene-alpha,beta-dioxygenase and related enzymes	3	8	0.749981	0.621813	1
Pyrroloquinoline-quinone synthase (EC 1.3.3.11)	3	8	0.749981	0.621813	1
Serine--glyoxylate aminotransferase (EC 2.6.1.45)	3	8	0.749981	0.621813	1
Transcriptional regulator of rhamnose utilization, AraC family	3	8	0.749981	0.621813	1
Various polyols ABC transporter, permease component 1	3	8	0.749981	0.621813	1
RNA polymerase sigma-70 factor, ECF subfamily	22	59	0.745746	0.310661	0.288619
ABC transport system, permease component YbhS	16	43	0.74417	0.352893	0.337108
Iron binding protein IscA for iron-sulfur cluster assembly	16	43	0.74417	0.352893	0.337108
DNA polymerase III alpha subunit (EC 2.7.7.7)	97	261	0.743279	0.160733	0.0116306
Myo-inositol 2-dehydrogenase 1 (EC 1.1.1.18)	13	35	0.742841	0.382209	0.444296
Phage tail sheath monomer	13	35	0.742841	0.382209	0.444296
Catalyzes the cleavage of p-aminobenzoyl-glutamate to p-aminobenzoate and glutamate, subunit A	30	81	0.740726	0.270512	0.190183
FIG000605: protein co-occurring with transport systems (COG1739)	20	54	0.740726	0.320754	0.269397
Flavodoxin	14	38	0.736829	0.368068	0.378993
RND efflux system, inner membrane transporter CmeB	185	505	0.732662	0.116989	0.000233236
PTS system, galactitol-specific IIC component (EC 2.7.1.69)	15	41	0.731696	0.3555	0.324589
transcriptional regulator, Crp/Fnr family	15	41	0.731696	0.3555	0.324589
Phosphocarrier protein of PTS system	19	52	0.730759	0.322764	0.259541
Rare lipoprotein A precursor	27	74	0.72972	0.278348	0.170994
ABC transporter multidrug efflux pump, fused ATP-binding domains	24	66	0.727264	0.29145	0.21833
ABC transport system, permease component YbhR	16	44	0.727264	0.344203	0.337717
Benzoate 1,2-dioxygenase beta subunit (EC 1.14.12.10)	4	11	0.727264	0.558345	0.785691
Hcp transcriptional regulator HcpR (Crp/Fnr family)	4	11	0.727264	0.558345	0.785691
Probable glutathione S-transferase-related transmembrane protein (EC 2.5.1.18)	4	11	0.727264	0.558345	0.785691
Imidazolonepropionase (EC 3.5.2.7)	17	47	0.723397	0.333988	0.289645
Outer membrane protein assembly factor YaeT precursor	39	108	0.722216	0.23482	0.0808235
capsular polysaccharide biosynthesis protein	13	36	0.722215	0.370757	0.364806
Diacylglycerol kinase (EC 2.7.1.107)	18	50	0.719994	0.324707	0.249314
L-threonine 3-O-phosphate decarboxylase (EC 4.1.1.81)	9	25	0.719994	0.424277	0.469565
Putative DNA-binding protein in cluster with Type I restriction-modification system	9	25	0.719994	0.424277	0.469565
Potassium uptake protein TrkH	32	89	0.719096	0.254694	0.122604
PTS system, glucose-specific IIA component	23	64	0.718745	0.292921	0.210517
Prolipoprotein diacylglyceryl transferase (EC 2.4.99.-)	28	78	0.717944	0.269241	0.149049
Pyruvate oxidase [ubiquinone, cytochrome] (EC 1.2.2.2)	28	78	0.717944	0.269241	0.149049
Ferredoxin reductase	19	53	0.716977	0.316143	0.260236
Heat shock protein 60 family co-chaperone GroES	15	42	0.714283	0.346347	0.325266
Excinuclease ABC subunit A, dimeric form	10	28	0.714283	0.404729	0.395255
Phytoene synthase (EC 2.5.1.32)	5	14	0.714283	0.512936	0.631186
ATP-dependent Clp protease proteolytic subunit (EC 3.4.21.92)	31	87	0.712641	0.255663	0.117917
Heat shock protein GrpE	26	73	0.712327	0.275503	0.165252
Membrane proteins related to metalloendopeptidases	32	90	0.71111	0.251595	0.102787
Biosynthetic Aromatic amino acid aminotransferase beta (EC 2.6.1.57)	11	31	0.709677	0.387874	0.413424
Extracellular Matrix protein PelA	11	31	0.709677	0.387874	0.413424
Tryptophan synthase beta chain (EC 4.2.1.20)	28	79	0.70886	0.265517	0.124488
4-hydroxybenzoyl-CoA thioesterase family active site	29	82	0.707317	0.260947	0.130431
Iojap protein	18	51	0.705883	0.317786	0.250068
SSU ribosomal protein S21p	12	34	0.705883	0.373069	0.349632
Major facilitator family transporter	37	105	0.704762	0.233912	0.0746334
Acetaldehyde dehydrogenase, acetylating, (EC 1.2.1.10) in gene cluster for degradation of phenols, cresols, catechol	7	20	0.7	0.449926	0.54123
MotA/TolQ/ExbB proton channel family protein	45	129	0.697675	0.212234	0.0366007
Translation elongation factor Ts	24	69	0.695653	0.277645	0.152144
ABC-type Fe3+ transport system, periplasmic component	8	23	0.695653	0.426622	0.448983
Transamidase GatB domain protein	8	23	0.695653	0.426622	0.448983
Methylisocitrate lyase (EC 4.1.3.30)	10	29	0.689656	0.38981	0.395964
Leucyl-tRNA synthetase (EC 6.1.1.4)	61	177	0.689266	0.182725	0.0109414
Signal recognition particle receptor protein FtsY (=alpha subunit) (TC 3.A.5.1.1)	33	96	0.6875	0.239272	0.0622538
Di-/tripeptide transporter	13	38	0.684211	0.34978	0.298225
6-phosphofructokinase (EC 2.7.1.11)	27	79	0.683545	0.259156	0.0988524
Malonyl CoA-acyl carrier protein transacylase (EC 2.3.1.39)	124	363	0.683196	0.130604	0.000206336
D-tyrosyl-tRNA(Tyr) deacylase (EC 3.6.1.n1)	14	41	0.682927	0.339092	0.253236
Cytochrome O ubiquinol oxidase subunit III (EC 1.10.3.-)	15	44	0.681819	0.329381	0.216214
N-acetyl-L,L-diaminopimelate deacetylase (EC 3.5.1.47)	15	44	0.681819	0.329381	0.216214
Long-chain-fatty-acid--CoA ligase (EC 6.2.1.3)	242	711	0.680732	0.0948868	1.33582e-07
Phage portal protein	35	103	0.679612	0.230309	0.0471963
O-succinylhomoserine sulfhydrylase (EC 2.5.1.48)	23	68	0.676471	0.274201	0.119183
RNA-binding C-terminal domain PUA	25	74	0.675676	0.264425	0.109119
Tyrosine-protein kinase Wzc (EC 2.7.10.2)	42	126	0.666667	0.208156	0.0218417
Beta-glucosidase (EC 3.2.1.21)	36	108	0.666667	0.222768	0.0339132
Alkyl hydroperoxide reductase subunit C-like protein	22	66	0.666667	0.274962	0.113009
FIG021952: putative membrane protein	20	60	0.666667	0.286071	0.123784
Membrane protein involved in the export of O-antigen, teichoic acid lipoteichoic acids	19	57	0.666667	0.292154	0.144033
Error-prone, lesion bypass DNA polymerase V (UmuC)	18	54	0.666667	0.29871	0.1684
Beta-glucoside bgl operon antiterminator, BglG family	17	51	0.666667	0.305732	0.158347
16S rRNA processing protein RimM	16	48	0.666667	0.313301	0.184953
Mlc, transcriptional repressor of MalT (the transcriptional activator of maltose regulon) and manXYZ operon	16	48	0.666667	0.313301	0.184953
Cold shock protein CspC	13	39	0.666667	0.34015	0.239922
Trehalose-6-phosphate phosphatase (EC 3.1.3.12)	13	39	0.666667	0.34015	0.239922
Type IV pilus biogenesis protein PilF	13	39	0.666667	0.34015	0.239922
Dihydropyrimidine dehydrogenase [NADP+] (EC 1.3.1.2)	12	36	0.666667	0.350864	0.283508
Glutamyl-tRNA(Gln) synthetase (EC 6.1.1.24)	11	33	0.666667	0.362718	0.266814
Dihydroxyacetone kinase family protein	10	30	0.666667	0.375958	0.31585
Extracellular Matrix protein PelB	10	30	0.666667	0.375958	0.31585
Putative dihydroxyacetone kinase (EC 2.7.1.29), dihydroxyacetone binding subunit	6	18	0.666667	0.45005	0.517011
RNA methyltransferase, TrmH family, group 1	6	18	0.666667	0.45005	0.517011
RNA binding methyltransferase FtsJ like	5	15	0.666667	0.477113	0.487759
Heptaprenyl diphosphate synthase component II (EC 2.5.1.30)	4	12	0.666667	0.509959	0.601689
Putative tRNA-m1A22 methylase	4	12	0.666667	0.509959	0.601689
CDP-glycerol:poly(glycerophosphate) glycerophosphotransferase (EC 2.7.8.12)	3	9	0.666667	0.550554	0.761552
Cytochrome c oxidase subunit CcoQ (EC 1.9.3.1)	3	9	0.666667	0.550554	0.761552
Leucine dehydrogenase (EC 1.4.1.9)	3	9	0.666667	0.550554	0.761552
NPQTN specific sortase B	3	9	0.666667	0.550554	0.761552
Penicillin-binding protein PBP2	3	9	0.666667	0.550554	0.761552
Putative pimeloyl-CoA dehydrogenase (Small subunit), PimD-like (EC 1.3.99.-)	3	9	0.666667	0.550554	0.761552
Transcriptional repressor, BlaI/MecI family	3	9	0.666667	0.550554	0.761552
Xylanase	3	9	0.666667	0.550554	0.761552
2-Keto-D-gluconate dehydrogenase (EC 1.1.99.4), membrane-bound, cytochrome c	2	6	0.666667	0.600872	1
ABC transporter, predicted N-acetylneuraminate transport system permease protein 2	2	6	0.666667	0.600872	1
Benzoyl-CoA reductase subunit BadG (EC 1.3.99.15)	2	6	0.666667	0.600872	1
Deoxyribonucleoside regulator DeoR (transcriptional repressor)	2	6	0.666667	0.600872	1
FIG002379: metal-dependent hydrolase	2	6	0.666667	0.600872	1
NMN 5'-nucleotidase, extracellular (EC 3.1.3.5)	2	6	0.666667	0.600872	1
Propanediol utilization transcriptional activator	2	6	0.666667	0.600872	1
RNA polymerase sigma factor SigB	2	6	0.666667	0.600872	1
Transcriptional regulator of rhamnose utilization, DeoR family	2	6	0.666667	0.600872	1
2,3-dihydro-2,3-dihydroxybenzoate dehydrogenase (EC 1.3.1.28) [bacillibactin] siderophore	1	3	0.666667	0.653963	1
5-methyltetrahydrofolate:corrinoid iron-sulfur protein methyltransferase	1	3	0.666667	0.653963	1
Acetoin catabolism protein X	1	3	0.666667	0.653963	1
Alginate biosynthesis transcriptional activator	1	3	0.666667	0.653963	1
Anaerobic sulfite reductase subunit C (EC 1.8.1.-)	1	3	0.666667	0.653963	1
ATP-dependent DNA ligase (EC 6.5.1.1) LigC	1	3	0.666667	0.653963	1
Ccs1/ResB-related putative cytochrome C-type biogenesis protein	1	3	0.666667	0.653963	1
CDP-ribitol:poly(ribitol phosphate) ribitol phosphotransferase	1	3	0.666667	0.653963	1
Cell envelope-associated transcriptional attenuator LytR-CpsA-Psr, subfamily M (as in PMID19099556)	1	3	0.666667	0.653963	1
Cobalt-containing nitrile hydratase subunit alpha (EC 4.2.1.84)	1	3	0.666667	0.653963	1
Coenzyme F420-reducing hydrogenase, beta subunit	1	3	0.666667	0.653963	1
Cold shock protein CspF	1	3	0.666667	0.653963	1
Ferredoxin 3 fused to uncharacterized domain	1	3	0.666667	0.653963	1
Ferric uptake regulation protein	1	3	0.666667	0.653963	1
fructose response regulator of fruA and EII fructose/mannose	1	3	0.666667	0.653963	1
Heme oxygenase (EC 1.14.99.3)	1	3	0.666667	0.653963	1
hydrogenase, subunit gamma related protein	1	3	0.666667	0.653963	1
Maleate cis-trans isomerase (EC 5.2.1.1)	1	3	0.666667	0.653963	1
Mannose-1-phosphate guanylyltransferase (EC 2.7.7.13 )	1	3	0.666667	0.653963	1
NrtR-regulated hypothetical NrtY, PpnK-type ATP-NAD kinase domain	1	3	0.666667	0.653963	1
Osmotically activated L-carnitine/choline ABC transporter, permease protein OpuCB	1	3	0.666667	0.653963	1
Phage baseplate assembly protein J	1	3	0.666667	0.653963	1
Phosphoserine phosphatase rsbX (EC 3.1.3.3)	1	3	0.666667	0.653963	1
Poly(3-hydroxyalkanoate) depolymerase	1	3	0.666667	0.653963	1
PutR, transcriptional activator of PutA and PutP	1	3	0.666667	0.653963	1
Similar to Hydroxyacylglutathione hydrolase, but in an organism lacking glutathione biosynthesis	1	3	0.666667	0.653963	1
Similar to TadZ/CpaE, associated with Flp pilus assembly	1	3	0.666667	0.653963	1
TetR family regulatory protein of MDR cluster	1	3	0.666667	0.653963	1
Tyrosine recombinase xerC	1	3	0.666667	0.653963	1
Universal stress protein family 7	1	3	0.666667	0.653963	1
Chaperone protein HtpG	37	112	0.660715	0.217971	0.0295318
Threonyl-tRNA synthetase (EC 6.1.1.3)	45	137	0.656935	0.198662	0.0145502
sensor histidine kinase	44	134	0.656717	0.200579	0.013736
Cytochrome c heme lyase subunit CcmL	17	52	0.653847	0.299389	0.159348
Glycosyl transferase, group 1	15	46	0.652174	0.313979	0.174419
DNA polymerase IV (EC 2.7.7.7)	29	89	0.651686	0.238624	0.0502887
Adenine deaminase (EC 3.5.4.2)	14	43	0.651163	0.322155	0.205375
NAD-dependent epimerase/dehydratase	14	43	0.651163	0.322155	0.205375
Aspartate carbamoyltransferase regulatory chain (PyrI)	12	37	0.648649	0.34069	0.225956
Ribonuclease P protein component (EC 3.1.26.5)	12	37	0.648649	0.34069	0.225956
UDP-N-acetylmuramoylalanyl-D-glutamyl-2,6-diaminopimelate--D-alanyl-D-alanine ligase (EC 6.3.2.10)	33	102	0.647059	0.22393	0.0284094
Chromosome partition protein MukE	10	31	0.645162	0.36301	0.250081
Multiple sugar ABC transporter, membrane-spanning permease protein MsmF	10	31	0.645162	0.36301	0.250081
Glutathione S-transferase (EC 2.5.1.18)	44	137	0.642336	0.19577	0.00923064
6-phosphogluconolactonase (EC 3.1.1.31)	16	50	0.64	0.299821	0.150087
Arginine ABC transporter, ATP-binding protein ArtP	8	25	0.64	0.390504	0.355929
Phosphate transport regulator (distant homolog of PhoU)	8	25	0.64	0.390504	0.355929
Hypothetical oxidoreductase YqhD (EC 1.1.-.-)	14	44	0.636364	0.314298	0.163571
Ser/Thr protein phosphatase family protein, UDP-2,3-diacylglucosamine hydrolase (EC 3.6.1.54) homolog	7	22	0.636364	0.406763	0.331545
Glycogen phosphorylase (EC 2.4.1.1)	40	126	0.634921	0.201618	0.0106798
Membrane alanine aminopeptidase N (EC 3.4.11.2)	53	167	0.634731	0.177831	0.00329918
Aspartate racemase (EC 5.1.1.13)	13	41	0.634147	0.32238	0.193109
D-3-phosphoglycerate dehydrogenase (EC 1.1.1.95)	69	218	0.633028	0.157359	0.000699584
Chaperone protein DnaJ	31	98	0.632653	0.224508	0.0249133
Maltodextrin glucosidase (EC 3.2.1.20)	31	98	0.632653	0.224508	0.0249133
NADH-ubiquinone oxidoreductase chain G (EC 1.6.5.3)	43	136	0.632353	0.19443	0.00867607
Tryptophanyl-tRNA synthetase (EC 6.1.1.2)	30	95	0.631579	0.22729	0.0287557
Aspartyl-tRNA(Asn) amidotransferase subunit C (EC 6.3.5.6)	6	19	0.631579	0.425137	0.399518
Flp pilus assembly protein RcpC/CpaB	6	19	0.631579	0.425137	0.399518
Glutamyl-tRNA(Gln) amidotransferase subunit C (EC 6.3.5.7)	6	19	0.631579	0.425137	0.399518
Cold shock protein CspE	11	35	0.628572	0.340612	0.211298
S-adenosylmethionine:tRNA ribosyltransferase-isomerase (EC 5.-.-.-)	30	96	0.625	0.224742	0.023224
oxidoreductase of aldo/keto reductase family, subgroup 1	10	32	0.625	0.350942	0.251317
3-oxoadipate CoA-transferase subunit A (EC 2.8.3.6)	5	16	0.625	0.445924	0.488516
Probable RND efflux membrane fusion protein	32	103	0.62136	0.217146	0.0174544
Malto-oligosyltrehalose synthase (EC 5.4.99.15)	9	29	0.62069	0.362233	0.232262
DNA-directed RNA polymerase alpha subunit (EC 2.7.7.6)	22	71	0.619719	0.254052	0.0480647
AMP nucleosidase (EC 3.2.2.4)	21	68	0.617648	0.258103	0.0557026
tRNA-guanine transglycosylase (EC 2.4.2.29)	32	104	0.615385	0.214894	0.0140929
Co-activator of prophage gene expression IbrA	16	52	0.615385	0.28744	0.094775
1,2-dihydroxycyclohexa-3,5-diene-1-carboxylate dehydrogenase (EC 1.3.1.25)	4	13	0.615385	0.469221	0.453251
Alpha-L-fucosidase (EC 3.2.1.51)	4	13	0.615385	0.469221	0.453251
Methionine transporter MetT	4	13	0.615385	0.469221	0.453251
NAD-dependent formate dehydrogenase alpha subunit	4	13	0.615385	0.469221	0.453251
Nitrilase/cyanide hydratase and apolipoprotein N-acyltransferase	4	13	0.615385	0.469221	0.453251
Phenylacetate-CoA oxygenase, PaaJ subunit	4	13	0.615385	0.469221	0.453251
RNA methyltransferase, TrmH family	4	13	0.615385	0.469221	0.453251
Replicative DNA helicase (EC 3.6.1.-)	47	153	0.61438	0.18108	0.00332172
Type I restriction-modification system, DNA-methyltransferase subunit M (EC 2.1.1.72)	35	114	0.614036	0.206159	0.011456
DNA ligase (EC 6.5.1.2)	46	150	0.613334	0.182485	0.00305285
ATP phosphoribosyltransferase (EC 2.4.2.17)	23	75	0.613334	0.246566	0.0414096
Osmosensitive K+ channel histidine kinase KdpD (EC 2.7.3.-)	65	212	0.613208	0.156145	0.000433397
DNA-binding protein H-NS	15	49	0.612245	0.293373	0.111021
Exodeoxyribonuclease VII small subunit (EC 3.1.11.6)	15	49	0.612245	0.293373	0.111021
Sodium-dependent phosphate transporter	26	85	0.611765	0.23342	0.0266894
tmRNA-binding protein SmpB	18	59	0.61017	0.271502	0.0697012
DNA polymerase III delta subunit (EC 2.7.7.7)	32	105	0.609524	0.212654	0.0140938
Ferredoxin, 2Fe-2S	21	69	0.608696	0.254068	0.0444347
Lysine decarboxylase (EC 4.1.1.18)	7	23	0.608696	0.388123	0.332785
Potassium-transporting ATPase B chain (EC 3.6.3.12) (TC 3.A.3.7.1)	31	103	0.601942	0.21269	0.0130387
NADH-ubiquinone oxidoreductase chain E (EC 1.6.5.3)	15	50	0.6	0.287086	0.0873794
ATP-dependent nuclease, subunit A	9	30	0.6	0.349424	0.233681
FIG002283: Isochorismatase family protein	6	20	0.6	0.402858	0.305528
tRNA:m(5)U-54 MTase gid	6	20	0.6	0.402858	0.305528
Type II secretory pathway, component PulF	6	20	0.6	0.402858	0.305528
Ethanolamine utilization protein similar to PduL	3	10	0.6	0.493915	0.563729
probably aromatic ring hydroxylating enzyme, evidenced by COGnitor	3	10	0.6	0.493915	0.563729
Tricarboxylate transport transcriptional regulator TctD	3	10	0.6	0.493915	0.563729
Metal-dependent hydrolase YbeY, involved in rRNA and/or ribosome maturation and assembly	17	57	0.596492	0.271226	0.0641908
Chromosome partition protein MukF	14	47	0.595745	0.292856	0.102482
Phosphoserine phosphatase (EC 3.1.3.3)	39	131	0.59542	0.190106	0.00424611
COG0779: clustered with transcription termination protein NusA	16	54	0.592593	0.276029	0.0751255
Translation initiation factor 2	47	159	0.591195	0.173639	0.00111164
SOS-response repressor and protease LexA (EC 3.4.21.88)	18	61	0.590164	0.261947	0.0554201
Purine nucleoside phosphorylase (EC 2.4.2.1)	23	78	0.589744	0.236352	0.0262227
DNA polymerase III beta subunit (EC 2.7.7.7)	25	85	0.588236	0.227524	0.019601
Gentisate 1,2-dioxygenase (EC 1.13.11.4)	5	17	0.588236	0.418584	0.369289
Type IV fimbrial biogenesis protein PilX	5	17	0.588236	0.418584	0.369289
Ribosome recycling factor	17	58	0.586207	0.266211	0.0505229
DNA polymerase III epsilon subunit (EC 2.7.7.7)	24	82	0.585366	0.230281	0.022862
Ferredoxin-dependent glutamate synthase (EC 1.4.7.1)	12	41	0.585366	0.305343	0.109682
Xanthine and CO dehydrogenases maturation factor, XdhC/CoxF family	12	41	0.585366	0.305343	0.109682
Cytochrome c heme lyase subunit CcmH	19	65	0.584616	0.253594	0.0373629
Transcription termination protein NusA	28	96	0.583334	0.214815	0.0100689
Cystathionine beta-synthase (EC 4.2.1.22)	7	24	0.583334	0.3711	0.254311
Muconate cycloisomerase (EC 5.5.1.1)	7	24	0.583334	0.3711	0.254311
Beta-xylosidase (EC 3.2.1.37)	9	31	0.580646	0.337499	0.179763
Seryl-tRNA synthetase (EC 6.1.1.11)	31	107	0.57944	0.204093	0.00655948
Topoisomerase IV subunit A (EC 5.99.1.-)	36	125	0.576001	0.189964	0.00257864
4-carboxymuconolactone decarboxylase (EC 4.1.1.44)	21	73	0.575343	0.239118	0.0280076
RNA polymerase sigma-54 factor RpoN	33	115	0.573914	0.19657	0.00391044
Leucine-, isoleucine-, valine-, threonine-, and alanine-binding protein	32	112	0.571429	0.198296	0.00450817
Tryptophan synthase alpha chain (EC 4.2.1.20)	18	63	0.571429	0.253033	0.0339412
Undecaprenyl diphosphate synthase (EC 2.5.1.31)	18	63	0.571429	0.253033	0.0339412
DNA replication protein DnaC	12	42	0.571429	0.29758	0.1111
S-adenosylmethionine-dependent methyltransferase Functionally Coupled to the MukBEF Chromosome Partitioning Mechanism	10	35	0.571429	0.319074	0.153483
Alanine dehydrogenase (EC 1.4.1.1)	8	28	0.571429	0.346365	0.214904
2-polyprenylphenol hydroxylase and related flavodoxin oxidoreductases	6	21	0.571429	0.382728	0.307067
Isopentenyl-diphosphate delta-isomerase (EC 5.3.3.2)	6	21	0.571429	0.382728	0.307067
2-keto-4-pentenoate hydratase (EC 4.2.1.80)	4	14	0.571429	0.434497	0.454327
Carboxynorspermidine dehydrogenase, putative (EC 1.1.1.-)	4	14	0.571429	0.434497	0.454327
Hemophore HasA	4	14	0.571429	0.434497	0.454327
Holin	4	14	0.571429	0.434497	0.454327
Nitric-oxide reductase (EC 1.7.99.7), quinol-dependent	4	14	0.571429	0.434497	0.454327
Organic hydroperoxide resistance protein	4	14	0.571429	0.434497	0.454327
Flp pilus assembly protein TadD, contains TPR repeat	2	7	0.571429	0.513524	0.726869
GTP-binding protein YqeH, required for biogenesis of 30S ribosome subunit	2	7	0.571429	0.513524	0.726869
Neuraminidase NanP	2	7	0.571429	0.513524	0.726869
Probable carboxyvinyl-carboxyphosphonate phosphorylmutase (EC 2.7.8.23)	2	7	0.571429	0.513524	0.726869
Type III secretion protein (YscP)	2	7	0.571429	0.513524	0.726869
DNA gyrase subunit A (EC 5.99.1.3)	64	225	0.568889	0.144888	3.54208e-05
DNA polymerase I (EC 2.7.7.7)	55	194	0.567011	0.154609	0.000119096
ATP-dependent Clp protease ATP-binding subunit ClpX	28	99	0.565657	0.207789	0.0062391
6-phosphogluconate dehydrogenase, decarboxylating (EC 1.1.1.44)	26	92	0.565218	0.214318	0.00829679
GGDEF family protein	13	46	0.565218	0.285085	0.0725427
Urocanate hydratase (EC 4.2.1.49)	18	64	0.562501	0.248796	0.0342172
Filamentous haemagglutinin family outer membrane protein associated with VreARI signalling system	9	32	0.562501	0.326347	0.137589
DNA gyrase subunit B (EC 5.99.1.3)	43	153	0.562092	0.171032	0.000611677
ADA regulatory protein	21	75	0.560001	0.232279	0.0170015
NAD-specific glutamate dehydrogenase (EC 1.4.1.2), large form	14	50	0.560001	0.274112	0.0624806
RNA-binding protein Hfq	7	25	0.560001	0.355494	0.192989
Glucose-6-phosphate 1-dehydrogenase (EC 1.1.1.49)	31	111	0.558559	0.19616	0.00320514
Organic solvent tolerance protein precursor	31	111	0.558559	0.19616	0.00320514
LysR family transcriptional regulator YneJ	12	43	0.55814	0.290213	0.0851889
RNA polymerase sigma factor RpoE	17	61	0.557378	0.252204	0.0306104
Beta-1,3-glucosyltransferase	15	54	0.555556	0.264396	0.0413089
Oxygen-insensitive NADPH nitroreductase (EC 1.-.-.-)	15	54	0.555556	0.264396	0.0413089
3-oxoadipate CoA-transferase subunit B (EC 2.8.3.6)	5	18	0.555556	0.394323	0.276357
Putrescine utilization regulator	5	18	0.555556	0.394323	0.276357
Aspartyl-tRNA synthetase (EC 6.1.1.12)	38	137	0.554745	0.178107	0.000954916
tRNA uridine 5-carboxymethylaminomethyl modification enzyme GidA	26	94	0.553192	0.209405	0.00648211
Phosphate acetyltransferase (EC 2.3.1.8)	38	138	0.550725	0.176705	0.000747685
ABC transporter involved in cytochrome c biogenesis, ATPase component CcmA	11	40	0.550001	0.2955	0.0764267
Molybdenum cofactor biosynthesis protein MoaD	11	40	0.550001	0.2955	0.0764267
DNA topoisomerase I (EC 5.99.1.2)	48	175	0.548572	0.158591	0.0001528
Topoisomerase IV subunit B (EC 5.99.1.-)	29	106	0.54717	0.197462	0.00332573
Histidyl-tRNA synthetase (EC 6.1.1.21)	24	88	0.545455	0.213391	0.0066961
Alpha-mannosidase (EC 3.2.1.24)	18	66	0.545455	0.240728	0.0204173
Cell envelope-associated transcriptional attenuator LytR-CpsA-Psr, subfamily A1 (as in PMID19099556)	3	11	0.545455	0.44775	0.410653
Cobalamin biosynthesis protein CobG	3	11	0.545455	0.44775	0.410653
Periplasmic molybdate-binding domain	3	11	0.545455	0.44775	0.410653
Signal peptidase-like protein	3	11	0.545455	0.44775	0.410653
Site-specific tyrosine recombinase	3	11	0.545455	0.44775	0.410653
Tricarboxylate transport sensor protein TctE	3	11	0.545455	0.44775	0.410653
Uracil-DNA glycosylase, family 4	3	11	0.545455	0.44775	0.410653
VWA containing CoxE family protein	3	11	0.545455	0.44775	0.410653
O-acetylhomoserine sulfhydrylase (EC 2.5.1.49)	25	92	0.543479	0.208899	0.00581504
Potassium-transporting ATPase A chain (EC 3.6.3.12) (TC 3.A.3.7.1)	22	81	0.54321	0.220412	0.00889733
Glycerol-3-phosphate ABC transporter, permease protein UgpA (TC 3.A.1.1.3)	16	59	0.542373	0.251063	0.0273827
COG0613, Predicted metal-dependent phosphoesterases (PHP family)	20	74	0.540541	0.228235	0.0118453
Late competence protein ComEC, DNA transport	7	26	0.538462	0.341138	0.194901
Aspartate aminotransferase (EC 2.6.1.1)	148	552	0.536232	0.0920518	1.61414e-12
Alkyl hydroperoxide reductase protein F (EC 1.6.4.-)	19	71	0.535212	0.230666	0.0136174
Hydroxyacylglutathione hydrolase (EC 3.1.2.6)	20	75	0.533334	0.224975	0.011872
N-acetylmuramoyl-L-alanine amidase	12	45	0.533334	0.276542	0.0498102
Sua5 YciO YrdC YwlC family protein	12	45	0.533334	0.276542	0.0498102
ATP-dependent RNA helicase NGO0650	4	15	0.533334	0.404493	0.334087
FIG004556: membrane metalloprotease	4	15	0.533334	0.404493	0.334087
Oxaloacetate decarboxylase alpha chain (EC 4.1.1.3)	4	15	0.533334	0.404493	0.334087
Glycogen debranching enzyme (EC 3.2.1.-)	25	94	0.531915	0.204142	0.0045641
Phosphoenolpyruvate-protein phosphotransferase of PTS system (EC 2.7.3.9)	71	267	0.531836	0.128411	7.96936e-07
GTP-binding protein HflX	22	83	0.530121	0.214723	0.0068594
Iron-sulfur cluster regulator IscR	18	68	0.529412	0.233151	0.0157889
Enolase (EC 4.2.1.11)	28	106	0.528302	0.193029	0.00178144
DNA-binding protein HU-beta	14	53	0.528302	0.257611	0.0371801
TPR repeat containing exported protein	15	57	0.526316	0.249609	0.024271
DNA-binding capsular synthesis response regulator RcsB	10	38	0.526316	0.292454	0.0676584
Endonuclease IV (EC 3.1.21.2)	10	38	0.526316	0.292454	0.0676584
Phenylacetate degradation enoyl-CoA hydratase PaaA (EC 4.2.1.17)	5	19	0.526316	0.372731	0.278307
Similar to phosphoglycolate phosphatase, clustered with ribosomal large subunit pseudouridine synthase C	5	19	0.526316	0.372731	0.278307
Magnesium transporter	16	61	0.524591	0.242296	0.0210454
Cell division protein FtsA	22	84	0.52381	0.211983	0.00527363
Translation initiation factor 3	17	65	0.523078	0.23565	0.0139519
Chaperone protein DnaK	46	176	0.522728	0.153425	4.44384e-05
Copper homeostasis protein CutE	24	92	0.52174	0.203466	0.00405665
NADH-ubiquinone oxidoreductase chain K (EC 1.6.5.3)	12	46	0.52174	0.270134	0.0500955
Biotin carboxyl carrier protein	6	23	0.52174	0.347954	0.171356
Protein YcgL	6	23	0.52174	0.347954	0.171356
Ubiquinol-cytochrome C reductase iron-sulfur subunit (EC 1.10.2.2)	6	23	0.52174	0.347954	0.171356
Methionine aminopeptidase (EC 3.4.11.18)	31	119	0.521009	0.181966	0.00092528
Trk system potassium uptake protein TrkA	21	81	0.518519	0.213852	0.0060626
Alkaline phosphatase like protein	7	27	0.518519	0.327908	0.145107
Putative preQ0 transporter	15	58	0.517242	0.245001	0.0246168
Queuosine Biosynthesis QueC ATPase	15	58	0.517242	0.245001	0.0246168
Transcriptional activator MetR	15	58	0.517242	0.245001	0.0246168
Methylcrotonyl-CoA carboxylase carboxyl transferase subunit (EC 6.4.1.4)	9	35	0.514286	0.296893	0.0786276
NADH pyrophosphatase (EC 3.6.1.22)	9	35	0.514286	0.296893	0.0786276
Dihydrolipoamide acyltransferase component of branched-chain alpha-keto acid dehydrogenase complex (EC 2.3.1.168)	10	39	0.512821	0.284536	0.067822
ABC transporter involved in cytochrome c biogenesis, CcmB subunit	11	43	0.511629	0.273696	0.0437259
Blue copper oxidase CueO precursor	11	43	0.511629	0.273696	0.0437259
Peptide deformylase (EC 3.5.1.88)	24	94	0.510639	0.198824	0.00235051
Acetyl-coenzyme A synthetase (EC 6.2.1.1)	34	134	0.507463	0.169881	0.00021441
Peptide chain release factor 3	21	83	0.506025	0.208347	0.00469968
Acetylornithine deacetylase (EC 3.5.1.16)	22	87	0.505748	0.204182	0.00307958
Outer membrane protein C precursor	24	95	0.505264	0.196581	0.00179903
1,4-alpha-glucan (glycogen) branching enzyme, GH-13-type (EC 2.4.1.18)	28	111	0.504505	0.183724	0.000807067
3-isopropylmalate dehydratase large subunit (EC 4.2.1.33)	23	92	0.500001	0.19794	0.00204971
UDP-N-acetylenolpyruvoylglucosamine reductase (EC 1.1.1.158)	20	80	0.500001	0.209975	0.00403416
Uracil-DNA glycosylase, family 1	19	76	0.500001	0.2145	0.00616527
Alpha,alpha-trehalose-phosphate synthase [UDP-forming] (EC 2.4.1.15)	16	64	0.500001	0.230218	0.0122286
Branched-chain alpha-keto acid dehydrogenase, E1 component, alpha subunit (EC 1.2.4.4)	10	40	0.500001	0.277041	0.0506234
Methylcrotonyl-CoA carboxylase biotin-containing subunit (EC 6.4.1.4)	8	32	0.500001	0.300927	0.092351
Dihydropyrimidinase (EC 3.5.2.2)	7	28	0.500001	0.31564	0.107581
Phage tail completion protein	6	24	0.500001	0.332862	0.173601
Predicted signal-transduction protein containing cAMP-binding and CBS domains	6	24	0.500001	0.332862	0.173601
Xanthine dehydrogenase, iron-sulfur cluster and FAD-binding subunit A (1.17.1.4)	6	24	0.500001	0.332862	0.173601
Putative deoxyribose-specific ABC transporter, permease protein	5	20	0.500001	0.353346	0.203739
Type IV fimbrial biogenesis protein PilW	5	20	0.500001	0.353346	0.203739
ATP-dependent Clp protease, ATP-binding subunit ClpC	4	16	0.500001	0.378361	0.243403
D-beta-hydroxybutyrate permease	4	16	0.500001	0.378361	0.243403
Glutamine amidotransferase, class-II	4	16	0.500001	0.378361	0.243403
Vanillate O-demethylase oxygenase subunit (EC 1.14.13.82)	4	16	0.500001	0.378361	0.243403
D-alanine--poly(phosphoribitol) ligase subunit 1 (EC 6.1.1.13)	3	12	0.500001	0.409457	0.412275
Glutathione S-transferase, unnamed subgroup 2 (EC 2.5.1.18)	3	12	0.500001	0.409457	0.412275
Outer membrane receptor for ferric coprogen and ferric-rhodotorulic acid	3	12	0.500001	0.409457	0.412275
Arginine/ornithine ABC transporter, periplasmic arginine/ornithine binding protein	2	8	0.500001	0.448273	0.512267
Chaperonin (heat shock protein 33)	2	8	0.500001	0.448273	0.512267
Clostridial MutS2-related protein	2	8	0.500001	0.448273	0.512267
Cold shock protein CspB	2	8	0.500001	0.448273	0.512267
FIG001553: Hydrolase, HAD subfamily IIIA	2	8	0.500001	0.448273	0.512267
FIG006988: Lipase/Acylhydrolase with GDSL-like motif	2	8	0.500001	0.448273	0.512267
Glucose 1-dehydrogenase (EC 1.1.1.47)	2	8	0.500001	0.448273	0.512267
Propanediol diffusion facilitator	2	8	0.500001	0.448273	0.512267
Putative benzaldehyde dehydrogenase oxidoreductase protein (EC 1.2.1.28)	2	8	0.500001	0.448273	0.512267
putative glycosyltransferase - possibly involved in cell wall localization and side chain formation of rhamnose-glucose polysaccharide	2	8	0.500001	0.448273	0.512267
Siderophore staphylobactin biosynthesis protein SbnC	2	8	0.500001	0.448273	0.512267
Succinate dehydrogenase cytochrome b558 subunit	2	8	0.500001	0.448273	0.512267
Transcriptional regulator ArcR essential for anaerobic expression of the ADI pathway, Crp/Fnr family	2	8	0.500001	0.448273	0.512267
Uracil-xanthine permease	2	8	0.500001	0.448273	0.512267
3-ketoacyl-CoA thiolase [isoleucine degradation] (EC 2.3.1.16)	1	4	0.500001	0.489844	1
5'-nucleotidase family protein in cluster with NagD-like phosphatase	1	4	0.500001	0.489844	1
ABC transporter permease protein YvcS	1	4	0.500001	0.489844	1
Alternative cytochrome c oxidase polypeptide CoxO (EC 1.9.3.1)	1	4	0.500001	0.489844	1
Cyanoalanine nitrilase (EC 3.5.5.4)	1	4	0.500001	0.489844	1
Hypothetical SAV0801 homolog in superantigen-encoding pathogenicity islands SaPI	1	4	0.500001	0.489844	1
L-2-keto-3-deoxyarabonate dehydratase (EC 4.2.1.43)	1	4	0.500001	0.489844	1
Membrane component of multidrug resistance system	1	4	0.500001	0.489844	1
Metallothionein	1	4	0.500001	0.489844	1
NAD-dependent formate dehydrogenase gamma subunit	1	4	0.500001	0.489844	1
NADH-quinone oxidoreductase chain F 2 (EC 1.6.99.5)	1	4	0.500001	0.489844	1
Nucleotide sugar epimerase	1	4	0.500001	0.489844	1
Phytoene dehydrogenase (EC 1.14.99.-)	1	4	0.500001	0.489844	1
Putative uncharacterized protein in cluster with two glycosyl transferases	1	4	0.500001	0.489844	1
S-nitrosomycothiol reductase MscR	1	4	0.500001	0.489844	1
Streptolysin S export transmembrane permease (SagH)	1	4	0.500001	0.489844	1
Two-component response regulator BceR	1	4	0.500001	0.489844	1
Unspecified monosaccharide ABC transport system, permease component 2	1	4	0.500001	0.489844	1
Unspecified monosaccharide ABC transport system, permease component Ia (FIG025991)	1	4	0.500001	0.489844	1
Unspecified monosaccharide ABC transport system, permease component Ib (FIG143636)	1	4	0.500001	0.489844	1
Ribonucleotide reductase of class Ia (aerobic), alpha subunit (EC 1.17.4.1)	32	129	0.496125	0.170283	0.000212682
Ferrous iron transport protein B	30	121	0.495868	0.175042	0.000363927
Membrane-bound lytic murein transglycosylase D precursor (EC 3.2.1.-)	25	101	0.49505	0.189005	0.00121157
Apolipoprotein N-acyltransferase (EC 2.3.1.-)	24	97	0.494846	0.192245	0.00136552
HlyD family secretion protein	21	85	0.494118	0.203122	0.00267356
Zinc ABC transporter, ATP-binding protein ZnuC	20	81	0.493828	0.207187	0.00410586
Superoxide dismutase [Fe] (EC 1.15.1.1)	16	65	0.492308	0.226434	0.00917651
Glycerophosphoryl diester phosphodiesterase (EC 3.1.4.46)	37	151	0.490067	0.157684	5.02834e-05
2-polyprenyl-6-methoxyphenol hydroxylase and related FAD-dependent oxidoreductases	12	49	0.489797	0.252678	0.0287612
Glutamate Aspartate transport ATP-binding protein GltL (TC 3.A.1.3.4)	12	49	0.489797	0.252678	0.0287612
Acyl carrier protein	22	90	0.48889	0.196922	0.00177403
Manganese transport protein MntH	22	90	0.48889	0.196922	0.00177403
UDP-N-acetylglucosamine 1-carboxyvinyltransferase (EC 2.5.1.7)	22	90	0.48889	0.196922	0.00177403
Anaerobic dehydrogenases, typically selenocysteine-containing	11	45	0.48889	0.260856	0.0327514
Cell division protein FtsW	31	127	0.48819	0.169679	0.000184078
Nitrogen regulation protein NR(I)	19	78	0.48718	0.208642	0.00348381
Putative cytochrome C-type biogenesis protein	19	78	0.48718	0.208642	0.00348381
Aromatic-amino-acid aminotransferase (EC 2.6.1.57)	9	37	0.486487	0.280022	0.0592246
GMP synthase [glutamine-hydrolyzing] (EC 6.3.5.2)	32	132	0.484849	0.166115	0.000123399
ATP-dependent nuclease, subunit B	8	33	0.484849	0.291369	0.0682
Octaprenyl diphosphate synthase (EC 2.5.1.90)	28	116	0.482759	0.175226	0.000268837
Putative deoxyribonuclease YjjV	14	58	0.482759	0.234098	0.0120425
Xanthine-guanine phosphoribosyltransferase (EC 2.4.2.22)	7	29	0.482759	0.304251	0.079707
ATP-dependent DNA ligase (EC 6.5.1.1) clustered with Ku protein, LigD	6	25	0.480001	0.318964	0.126615
Nitrilotriacetate monooxygenase component B (EC 1.14.13.-)	6	25	0.480001	0.318964	0.126615
Pyrimidine operon regulatory protein PyrR	6	25	0.480001	0.318964	0.126615
Glutamyl-tRNA synthetase (EC 6.1.1.17)	25	105	0.476191	0.181319	0.00052237
Signal peptidase I (EC 3.4.21.89)	25	105	0.476191	0.181319	0.00052237
D-Lactate dehydrogenase, cytochrome c-dependent (EC 1.1.2.4)	5	21	0.476191	0.3359	0.148304
Peptidase M48, Ste24p precursor	5	21	0.476191	0.3359	0.148304
Phytochrome, two-component sensor histidine kinase (EC 2.7.3.-)	5	21	0.476191	0.3359	0.148304
TonB-dependent hemin , ferrichrome receptor	14	59	0.474577	0.229898	0.00901807
Uridylate kinase (EC 2.7.4.-)	14	59	0.474577	0.229898	0.00901807
Exodeoxyribonuclease III (EC 3.1.11.2)	27	114	0.473685	0.174424	0.000229464
Maltose O-acetyltransferase (EC 2.3.1.79)	9	38	0.473685	0.27228	0.0435745
TolA protein	22	93	0.473119	0.190175	0.00100941
Rhodanese-related sulfurtransferases	13	55	0.472728	0.235818	0.0138812
Ribonucleotide reductase of class Ia (aerobic), beta subunit (EC 1.17.4.1)	21	89	0.471911	0.193436	0.00114341
Tyrosyl-tRNA synthetase (EC 6.1.1.1)	25	106	0.471699	0.179495	0.00039051
diguanylate cyclase/phosphodiesterase (GGDEF & EAL domains) with PAS/PAC sensor(s)	79	335	0.471642	0.107353	1.41644e-10
Isoquinoline 1-oxidoreductase beta subunit (EC 1.3.99.16)	16	68	0.470589	0.215864	0.00517319
Nucleoside diphosphate kinase (EC 2.7.4.6)	12	51	0.470589	0.242218	0.0157733
Electron transfer flavoprotein-ubiquinone oxidoreductase (EC 1.5.5.1)	8	34	0.470589	0.282393	0.0503845
RecD-like DNA helicase YrrC	8	34	0.470589	0.282393	0.0503845
CobW GTPase involved in cobalt insertion for B12 biosynthesis	4	17	0.470589	0.355392	0.24593
Extracellular Matrix protein PelG	4	17	0.470589	0.355392	0.24593
FIG015373: Membrane protein	4	17	0.470589	0.355392	0.24593
General secretion pathway protein A	4	17	0.470589	0.355392	0.24593
Uncharacterized protein with LysM domain, COG1652	4	17	0.470589	0.355392	0.24593
Various polyols ABC transporter, ATP-binding component	4	17	0.470589	0.355392	0.24593
ATP-dependent RNA helicase RhlE	15	64	0.468751	0.22069	0.00588105
L-arabinose transport system permease protein (TC 3.A.1.2.2)	15	64	0.468751	0.22069	0.00588105
TldE protein, part of TldE/TldD proteolytic complex	18	77	0.467533	0.20424	0.00223679
Aspartate-semialdehyde dehydrogenase (EC 1.2.1.11)	35	150	0.466667	0.153343	1.57939e-05
Rod shape-determining protein RodA	20	86	0.465117	0.194388	0.00129586
glutamine synthetase family protein	10	43	0.465117	0.256727	0.0280231
SSU ribosomal protein S14p (S29e)	10	43	0.465117	0.256727	0.0280231
Thioredoxin reductase (EC 1.8.1.9)	39	168	0.464286	0.145351	4.18781e-06
Glyoxylate reductase (EC 1.1.1.79)	13	56	0.464286	0.231369	0.0102516
Membrane-associated zinc metalloprotease	22	95	0.463159	0.185904	0.00077151
UDP-N-acetylglucosamine 2-epimerase (EC 5.1.3.14)	22	95	0.463159	0.185904	0.00077151
Glutamate transport membrane-spanning protein	15	65	0.461539	0.217092	0.00596776
Copper-sensing two-component system response regulator CusR	6	26	0.461539	0.306197	0.0920264
Sensor histidine kinase PrrB (RegB) (EC 2.7.3.-)	6	26	0.461539	0.306197	0.0920264
Type II/IV secretion system protein TadC, associated with Flp pilus assembly	6	26	0.461539	0.306197	0.0920264
2-ketogluconate transporter	3	13	0.461539	0.37718	0.292443
Gluconate 2-dehydrogenase (EC 1.1.99.3), membrane-bound, flavoprotein	3	13	0.461539	0.37718	0.292443
Iron-regulated protein A precursor	3	13	0.461539	0.37718	0.292443
Phenylalanine-4-hydroxylase (EC 1.14.16.1)	3	13	0.461539	0.37718	0.292443
S-adenosylmethionine synthetase (EC 2.5.1.6)	19	83	0.457832	0.195304	0.0014845
Signal recognition particle, subunit Ffh SRP54 (TC 3.A.5.1.1)	19	83	0.457832	0.195304	0.0014845
Glucosamine-6-phosphate deaminase (EC 3.5.99.6)	16	70	0.457144	0.209345	0.00393117
ABC-type nitrate/sulfonate/bicarbonate transport system, ATPase component	8	35	0.457144	0.273948	0.0507694
Translation elongation factor LepA	29	127	0.456694	0.162633	5.69774e-05
Probable transmembrane protein	100	438	0.456622	0.0929184	3.58848e-14
1-deoxy-D-xylulose 5-phosphate reductoisomerase (EC 1.1.1.267)	18	79	0.455697	0.198744	0.00165739
Pyruvate-flavodoxin oxidoreductase (EC 1.2.7.-)	33	145	0.455173	0.153204	1.4921e-05
Glucans biosynthesis protein D precursor	10	44	0.454546	0.250597	0.0205813
2,3-dihydro-2,3-dihydroxybenzoate dehydrogenase (EC 1.3.1.28) [enterobactin] siderophore	5	22	0.454546	0.320076	0.150961
FIG146085: 3'-to-5' oligoribonuclease A, Bacillus type	5	22	0.454546	0.320076	0.150961
PlcB, ORFX, ORFP, ORFB, ORFA, ldh gene	5	22	0.454546	0.320076	0.150961
Phosphoserine aminotransferase (EC 2.6.1.52)	17	75	0.453334	0.202361	0.00187767
DNA repair protein RecN	33	147	0.44898	0.150977	1.13119e-05
Acyl-phosphate:glycerol-3-phosphate O-acyltransferase PlsY	11	49	0.44898	0.238486	0.01327
Glutamate racemase (EC 5.1.1.3)	17	76	0.447369	0.199594	0.00189129
D-alanine--D-alanine ligase (EC 6.3.2.4)	21	94	0.446809	0.182486	0.000477183
Lipoate-protein ligase A	18	81	0.444445	0.193554	0.00124845
Uncharacterized protein ImpD	16	72	0.444445	0.203181	0.00210881
Chaperone protein HscB	10	45	0.444445	0.24475	0.0210548
Carboxyl-terminal protease (EC 3.4.21.102)	8	36	0.444445	0.265991	0.0367502
2-hydroxychromene-2-carboxylate isomerase	4	18	0.444445	0.335042	0.174895
Predicted transcriptional regulator for fatty acid degradation FadQ, TetR family	4	18	0.444445	0.335042	0.174895
Protein YidD	4	18	0.444445	0.335042	0.174895
3-hydroxybutyrate dehydrogenase (EC 1.1.1.30)	2	9	0.444445	0.397714	0.356194
6-phospho-beta-galactosidase (EC 3.2.1.85)	2	9	0.444445	0.397714	0.356194
Branched-chain acyl-CoA dehydrogenase (EC 1.3.99.12)	2	9	0.444445	0.397714	0.356194
Capsular polysaccharide synthesis enzyme Cap5G	2	9	0.444445	0.397714	0.356194
CoA-acylating propionaldehyde dehydrogenase	2	9	0.444445	0.397714	0.356194
Dihydroxyacetone kinase, ATP-dependent (EC 2.7.1.29)	2	9	0.444445	0.397714	0.356194
Exopolysaccharide biosynthesis glycosyltransferase EpsF (EC 2.4.1.-)	2	9	0.444445	0.397714	0.356194
Extracellular Matrix protein PelC	2	9	0.444445	0.397714	0.356194
FIG070121: Phage capsid and scaffold protein	2	9	0.444445	0.397714	0.356194
HupE-UreJ family metal transporter	2	9	0.444445	0.397714	0.356194
Lysine-epsilon oxidase (EC 1.4.3.20) antimicrobial protein LodA	2	9	0.444445	0.397714	0.356194
Minor curlin subunit CsgB, nucleation component of curlin monomers	2	9	0.444445	0.397714	0.356194
Ortholog of S. aureus MRSA252 (BX571856) SAR1694	2	9	0.444445	0.397714	0.356194
PhbF	2	9	0.444445	0.397714	0.356194
Predicted cell-wall-anchored protein SasA (LPXTG motif)	2	9	0.444445	0.397714	0.356194
Propanediol utilization polyhedral body protein PduA	2	9	0.444445	0.397714	0.356194
Propanediol utilization polyhedral body protein PduB	2	9	0.444445	0.397714	0.356194
Putative acyl-CoA dehydrogenase oxidoreductase (EC 1.3.99.3), may be related to NAD-dependent histone acetylation	2	9	0.444445	0.397714	0.356194
N-acetylglucosamine-6-phosphate deacetylase (EC 3.5.1.25)	25	113	0.442479	0.167692	9.02388e-05
NADP-specific glutamate dehydrogenase (EC 1.4.1.4)	21	95	0.442106	0.180456	0.000350552
ABC-type nitrate/sulfonate/bicarbonate transport systems, periplasmic components	19	86	0.441861	0.188085	0.000826194
Deoxyuridine 5'-triphosphate nucleotidohydrolase (EC 3.6.1.23)	11	50	0.440001	0.233476	0.00975694
Potassium-transporting ATPase C chain (EC 3.6.3.12) (TC 3.A.3.7.1)	11	50	0.440001	0.233476	0.00975694
Beta-ketoadipate enol-lactone hydrolase (EC 3.1.1.24)	9	41	0.439025	0.251395	0.0235304
4-hydroxy-3-methylbut-2-enyl diphosphate reductase (EC 1.17.1.2)	16	73	0.438357	0.200242	0.00155674
Monofunctional biosynthetic peptidoglycan transglycosylase (EC 2.4.2.-)	16	73	0.438357	0.200242	0.00155674
Phosphohistidine phosphatase SixA	7	32	0.437501	0.274524	0.0420309
Ribosome hibernation protein YhbH	7	32	0.437501	0.274524	0.0420309
Oligopeptide transport ATP-binding protein OppF (TC 3.A.1.5.1)	24	110	0.436364	0.168126	0.000101825
Ribosomal silencing factor RsfA (former Iojap)	12	55	0.436364	0.223658	0.00630371
Cell division protein FtsZ (EC 3.4.24.-)	17	78	0.435898	0.194159	0.00101824
Survival protein SurA precursor (Peptidyl-prolyl cis-trans isomerase SurA) (EC 5.2.1.8)	17	78	0.435898	0.194159	0.00101824
Branched-chain amino acid transport ATP-binding protein LivG (TC 3.A.1.4.1)	22	101	0.435644	0.174199	0.000170751
Arginyl-tRNA synthetase (EC 6.1.1.19)	27	124	0.435485	0.159499	2.92933e-05
GTP-binding protein EngA	27	124	0.435485	0.159499	2.92933e-05
TldD protein, part of TldE/TldD proteolytic complex	20	92	0.434783	0.180954	0.000397063
Cytochrome c-type protein TorY	5	23	0.434783	0.305668	0.107431
Membrane fusion component of tripartite multidrug resistance system	41	189	0.433863	0.132209	1.78369e-07
Phage minor tail protein	31	143	0.433567	0.14948	7.85769e-06
Short-chain dehydrogenase/reductase SDR	13	60	0.433334	0.215115	0.00408978
3-hydroxybutyryl-CoA dehydrogenase (EC 1.1.1.157)	8	37	0.432433	0.258482	0.0266547
Putative sensor-like histidine kinase YfhK	11	51	0.431373	0.22867	0.00983166
Shikimate kinase I (EC 2.7.1.71)	11	51	0.431373	0.22867	0.00983166
Glutaminyl-tRNA synthetase (EC 6.1.1.18)	21	98	0.428572	0.174594	0.000191158
3-dehydroquinate synthase (EC 4.2.3.4)	15	70	0.428572	0.200734	0.00174053
Co-activator of prophage gene expression IbrB	9	42	0.428572	0.245142	0.0170347
Protein AraJ precursor	6	28	0.428572	0.283483	0.0671702
ABC transporter (iron.B12.siderophore.hemin) , ATP-binding component	3	14	0.428572	0.349605	0.205894
ATP-dependent RNA helicase Bcep18194_A5658	3	14	0.428572	0.349605	0.205894
Extracellular matrix protein PelF, glycosyltransferase, group 1	3	14	0.428572	0.349605	0.205894
Indolepyruvate oxidoreductase subunit IorA (EC 1.2.7.8)	3	14	0.428572	0.349605	0.205894
Predicted transcriptional regulator LiuR of leucine degradation pathway, MerR family	3	14	0.428572	0.349605	0.205894
Probable transcription regulator protein of MDR efflux pump cluster	3	14	0.428572	0.349605	0.205894
Tryptophan 2,3-dioxygenase (EC 1.13.11.11)	3	14	0.428572	0.349605	0.205894
PTS system, N-acetylglucosamine-specific IIB component (EC 2.7.1.69)	26	122	0.42623	0.15843	2.40251e-05
Histidinol-phosphate aminotransferase (EC 2.6.1.9)	20	94	0.425533	0.176881	0.000212351
Xyloside transporter XynT	10	47	0.425533	0.233825	0.0109568
Cell wall endopeptidase, family M23/M37	27	127	0.425198	0.155481	1.59261e-05
3-oxoacyl-[acyl-carrier protein] reductase (EC 1.1.1.100)	107	504	0.424604	0.0832547	2.64929e-18
Cytochrome c-type biogenesis protein CcmC, putative heme lyase for CcmE	11	52	0.423078	0.224055	0.00708621
Threonine dehydratase (EC 4.3.1.19)	11	52	0.423078	0.224055	0.00708621
Transcription antitermination protein NusG	11	52	0.423078	0.224055	0.00708621
Aminoacyl-histidine dipeptidase (Peptidase D) (EC 3.4.13.3)	12	57	0.421053	0.215424	0.00460485
L-serine dehydratase 1 (EC 4.3.1.17)	12	57	0.421053	0.215424	0.00460485
Acetolactate synthase, catabolic (EC 2.2.1.6)	4	19	0.421053	0.31689	0.123836
Na+/H+-dicarboxylate symporters	4	19	0.421053	0.31689	0.123836
Outer membrane receptor proteins, likely involved in siderophore uptake	4	19	0.421053	0.31689	0.123836
PhnO protein	4	19	0.421053	0.31689	0.123836
Phosphoribosylglycinamide formyltransferase 2 (EC 2.1.2.-)	13	62	0.419356	0.207817	0.00300506
4-diphosphocytidyl-2-C-methyl-D-erythritol kinase (EC 2.7.1.148)	18	86	0.418605	0.181664	0.00035852
Transcriptional regulator containing an amidase domain and an AraC-type DNA-binding HTH domain	9	43	0.418605	0.239184	0.0123894
Twin-arginine translocation protein TatC	14	67	0.417911	0.200995	0.00196853
Autolysin sensor kinase (EC 2.7.3.-)	19	91	0.417583	0.177127	0.00023627
Single-stranded-DNA-specific exonuclease RecJ (EC 3.1.-.-)	24	115	0.417392	0.160397	2.95162e-05
CobN component of cobalt chelatase involved in B12 biosynthesis	10	48	0.416667	0.228719	0.00795384
Choline binding protein A	5	24	0.416667	0.292497	0.0762658
Ferric enterobactin transport system permease protein FepG (TC 3.A.1.14.2)	5	24	0.416667	0.292497	0.0762658
DEAD-box ATP-dependent RNA helicase CshA (EC 3.6.4.13)	21	101	0.415842	0.169106	0.000103353
Ferrochelatase, protoheme ferro-lyase (EC 4.99.1.1)	17	82	0.414635	0.184156	0.000399392
Cold shock protein CspG	12	58	0.413794	0.211527	0.00332798
Enoyl-[acyl-carrier-protein] reductase [NADH] (EC 1.3.1.9)	13	63	0.412699	0.204356	0.00216648
ATP-dependent DNA helicase RecQ	33	160	0.412501	0.13793	5.39621e-07
Ferric siderophore transport system, periplasmic binding protein TonB	20	97	0.412372	0.171094	0.000113261
FIG003879: Predicted amidohydrolase	7	34	0.411765	0.257732	0.0302242
Urease alpha subunit (EC 3.5.1.5)	7	34	0.411765	0.257732	0.0302242
Autoinducer 2 (AI-2) aldolase LsrF (EC 4.2.1.-)	8	39	0.410257	0.244657	0.0193152
Glycosyl transferase, group 1 family protein	8	39	0.410257	0.244657	0.0193152
Periplasmic thiol:disulfide interchange protein DsbA	9	44	0.409092	0.233477	0.0124354
Molybdenum cofactor biosynthesis protein MoaB	10	49	0.408164	0.223838	0.00805565
D-amino acid dehydrogenase small subunit (EC 1.4.99.1)	22	108	0.407408	0.162249	3.59551e-05
Ferric iron ABC transporter, permease protein	22	108	0.407408	0.162249	3.59551e-05
Peptidyl-prolyl cis-trans isomerase (EC 5.2.1.8)	11	54	0.407408	0.215317	0.0052461
Uncharacterized protein YeaG	13	64	0.406251	0.201001	0.00157229
Recombination protein RecR	16	79	0.405064	0.184212	0.000439467
Translation elongation factor P	15	75	0.400001	0.18663	0.000487519
Uroporphyrinogen-III synthase (EC 4.2.1.75)	13	65	0.400001	0.197754	0.00159324
Endo-1,4-beta-xylanase A precursor (EC 3.2.1.8)	11	55	0.400001	0.211216	0.00372171
probable beta-D-galactosidase	7	35	0.400001	0.250094	0.0215375
[Citrate [pro-3S]-lyase] ligase (EC 6.2.1.22)	6	30	0.400001	0.263911	0.0339998
Multidrug resistance transporter, Bcr/CflA family	6	30	0.400001	0.263911	0.0339998
ABC-type nitrate/sulfonate/bicarbonate transport system, permease component	4	20	0.400001	0.300599	0.127003
Enoyl-CoA hydratase [valine degradation] (EC 4.2.1.17)	4	20	0.400001	0.300599	0.127003
2-ketoglutaric semialdehyde dehydrogenase (EC 1.2.1.26)	3	15	0.400001	0.325778	0.209262
Cytochrome c4	3	15	0.400001	0.325778	0.209262
Kynureninase (EC 3.7.1.3)	3	15	0.400001	0.325778	0.209262
MutS-related protein, family 1	3	15	0.400001	0.325778	0.209262
P-hydroxybenzoate hydroxylase (EC 1.14.13.2)	3	15	0.400001	0.325778	0.209262
Various polyols ABC transporter, periplasmic substrate-binding protein	3	15	0.400001	0.325778	0.209262
Capsular polysaccharide export system inner membrane protein KpsE	2	10	0.400001	0.357385	0.358841
Capsule polysaccharide export protein	2	10	0.400001	0.357385	0.358841
DNA polymerase-like protein PA0670	2	10	0.400001	0.357385	0.358841
Glycogen biosynthesis protein GlgD, glucose-1-phosphate adenylyltransferase family	2	10	0.400001	0.357385	0.358841
Melibiose operon regulatory protein	2	10	0.400001	0.357385	0.358841
rhamnogalacturonan acetylesterase	2	10	0.400001	0.357385	0.358841
Ribosome modulation factor	2	10	0.400001	0.357385	0.358841
Rubredoxin	2	10	0.400001	0.357385	0.358841
Substrate-specific component QueT (COG4708) of predicted queuosine-regulated ECF transporter	2	10	0.400001	0.357385	0.358841
Thiosulfate reductase cytochrome B subunit (membrane anchoring protein)	2	10	0.400001	0.357385	0.358841
Transport ATP-binding protein CydCD	2	10	0.400001	0.357385	0.358841
TRAP-type transport system, periplasmic component, predicted N-acetylneuraminate-binding protein	2	10	0.400001	0.357385	0.358841
TRAP-type uncharacterized transport system, fused permease component	2	10	0.400001	0.357385	0.358841
3-phenylpropionate dioxygenase beta subunit (EC 1.14.1.-)	1	5	0.400001	0.391539	0.670781
Anaerobic sulfite reductase subunit A	1	5	0.400001	0.391539	0.670781
Anti-sigma F factor (EC 2.7.11.1)	1	5	0.400001	0.391539	0.670781
Arginine/ornithine ABC transporter, ATP-binding protein AotP	1	5	0.400001	0.391539	0.670781
Arginine/ornithine ABC transporter, permease protein AotM	1	5	0.400001	0.391539	0.670781
Arginine/ornithine ABC transporter, permease protein AotQ	1	5	0.400001	0.391539	0.670781
Dihydroflavonol-4-reductase (EC 1.1.1.219)	1	5	0.400001	0.391539	0.670781
L-cysteine:1D-myo-inosityl 2-amino-2-deoxy-alpha-D-glucopyranoside ligase MshC	1	5	0.400001	0.391539	0.670781
L-Cystine ABC transporter, permease protein TcyB	1	5	0.400001	0.391539	0.670781
LysR family transcriptional regulator PA3398	1	5	0.400001	0.391539	0.670781
Predicted transcriptional regulator of NADH dehydrogenase, Rrf2 family	1	5	0.400001	0.391539	0.670781
Propionyl-CoA carboxylase biotin-containing subunit (EC 6.4.1.3)	1	5	0.400001	0.391539	0.670781
Regulatory protein SoxS	1	5	0.400001	0.391539	0.670781
RNA polymerase sigma-E factor	1	5	0.400001	0.391539	0.670781
Siderophore staphylobactin biosynthesis protein SbnB	1	5	0.400001	0.391539	0.670781
Transcriptional regulator NfxB	1	5	0.400001	0.391539	0.670781
Transmembrane component BioN of energizing module of biotin ECF transporter	1	5	0.400001	0.391539	0.670781
TRAP transporter solute receptor, TAXI family precursor	1	5	0.400001	0.391539	0.670781
CTP synthase (EC 6.3.4.2)	24	121	0.396695	0.152001	8.33772e-06
Adenylylsulfate kinase (EC 2.7.1.25)	13	66	0.393941	0.194609	0.00113237
tRNA dimethylallyltransferase (EC 2.5.1.75)	13	66	0.393941	0.194609	0.00113237
tRNA (5-methylaminomethyl-2-thiouridylate)-methyltransferase (EC 2.1.1.61)	38	193	0.393784	0.123335	1.05721e-08
Inner membrane component of tripartite multidrug resistance system	37	188	0.393618	0.124734	1.58512e-08
Glycerol-3-phosphate ABC transporter, permease protein UgpE (TC 3.A.1.1.3)	11	56	0.392858	0.207288	0.00265558
Integration host factor alpha subunit	8	41	0.390245	0.232229	0.00985454
Preprotein translocase subunit SecG (TC 3.A.5.1.1)	8	41	0.390245	0.232229	0.00985454
DNA repair protein RadA	14	72	0.38889	0.186357	0.000530967
Fumarate and nitrate reduction regulatory protein	7	36	0.38889	0.24285	0.0221505
YciL protein	7	36	0.38889	0.24285	0.0221505
Sucrose-6-phosphate hydrolase (EC 3.2.1.B3)	13	67	0.388061	0.191546	0.000810669
Transcriptional regulator, IclR family	38	196	0.387756	0.121331	5.56496e-09
Tyrosine recombinase XerC	12	62	0.387098	0.197227	0.00124173
Anaerobic nitric oxide reductase flavorubredoxin	6	31	0.387098	0.255052	0.0346362
Flagellar transcriptional activator FlhD	6	31	0.387098	0.255052	0.0346362
Phosphoribosylformimino-5-aminoimidazole carboxamide ribotide isomerase (EC 5.3.1.16)	11	57	0.385966	0.203477	0.00190872
Probable low-affinity inorganic phosphate transporter	11	57	0.385966	0.203477	0.00190872
GTP-binding protein EngB	10	52	0.384616	0.210344	0.00421316
Epoxide hydrolase (EC 3.3.2.9)	5	26	0.384616	0.269277	0.054732
Gamma-glutamyl-putrescine synthetase (EC 6.3.1.11)	5	26	0.384616	0.269277	0.054732
Phenylacetate-CoA oxygenase/reductase, PaaK subunit	5	26	0.384616	0.269277	0.054732
Trehalase (EC 3.2.1.28)	13	68	0.382354	0.188589	0.000585191
Holliday junction DNA helicase RuvB	21	110	0.381819	0.154514	1.07335e-05
COG0028: Thiamine pyrophosphate-requiring enzymes	8	42	0.380953	0.226471	0.00994902
Enoyl-CoA hydratase [isoleucine degradation] (EC 4.2.1.17)	4	21	0.380953	0.285899	0.0877098
Glycerol-3-phosphate dehydrogenase (EC 1.1.5.3)	4	21	0.380953	0.285899	0.0877098
Ni,Fe-hydrogenase I cytochrome b subunit	4	21	0.380953	0.285899	0.0877098
Phage terminase, endonuclease subunit	4	21	0.380953	0.285899	0.0877098
Succinyl-CoA:3-ketoacid-coenzyme A transferase subunit A (EC 2.8.3.5)	4	21	0.380953	0.285899	0.0877098
Transcriptional repressor of the fructose operon, DeoR family	4	21	0.380953	0.285899	0.0877098
Excinuclease ABC subunit C	27	142	0.380283	0.138113	4.78173e-07
GDP-mannose 4,6-dehydratase (EC 4.2.1.47)	15	79	0.379748	0.176738	0.000255878
2',3'-cyclic-nucleotide 2'-phosphodiesterase (EC 3.1.4.16)	18	95	0.378948	0.163534	5.2637e-05
Phospho-N-acetylmuramoyl-pentapeptide-transferase (EC 2.7.8.13)	18	95	0.378948	0.163534	5.2637e-05
Flavodoxin 2	10	53	0.37736	0.206211	0.00294475
Phosphoribosylanthranilate isomerase (EC 5.3.1.24)	16	85	0.376472	0.170566	0.000119154
Polyribonucleotide nucleotidyltransferase (EC 2.7.7.8)	25	133	0.375941	0.141091	1.0881e-06
DNA polymerase III subunits gamma and tau (EC 2.7.7.7)	24	128	0.375001	0.143177	1.62724e-06
Iron-sulfur cluster assembly protein SufD	15	80	0.375001	0.174399	0.000179899
Rhamnulokinase (EC 2.7.1.5)	9	48	0.375001	0.213235	0.00451648
Isoquinoline 1-oxidoreductase alpha subunit (EC 1.3.99.16)	6	32	0.375001	0.246823	0.024083
Lactaldehyde reductase (EC 1.1.1.77)	6	32	0.375001	0.246823	0.024083
2,3,4,5-tetrahydropyridine-2,6-dicarboxylate N-acetyltransferase (EC 2.3.1.89)	3	16	0.375001	0.304984	0.143421
Type III secretion inner membrane protein (YscS,homologous to flagellar export components)	3	16	0.375001	0.304984	0.143421
Type IV fimbriae expression regulatory protein PilR	3	16	0.375001	0.304984	0.143421
DinG family ATP-dependent helicase YoaA	23	123	0.373985	0.145431	2.43773e-06
ADP-heptose--lipooligosaccharide heptosyltransferase II (EC 2.4.1.-)	14	75	0.373334	0.178518	0.000272285
TrkA, Potassium channel-family protein	11	59	0.372882	0.196244	0.00135477
Magnesium and cobalt efflux protein CorC	30	161	0.372672	0.129139	5.24816e-08
Penicillin-binding protein 2 (PBP-2)	19	102	0.37255	0.157032	1.74658e-05
tRNA-i(6)A37 methylthiotransferase	16	86	0.372094	0.168478	8.4306e-05
tRNA(Ile)-lysidine synthetase (EC 6.3.4.19)	16	86	0.372094	0.168478	8.4306e-05
Ribonuclease HI (EC 3.1.26.4)	8	43	0.372094	0.220977	0.00695985
2-dehydro-3-deoxyphosphogluconate aldolase (EC 4.1.2.14)	13	70	0.37143	0.182942	0.000413192
RNA polymerase sigma factor RpoD	25	135	0.370371	0.138868	5.54334e-07
D-malic enzyme (EC 1.1.1.83)	10	54	0.370371	0.202216	0.00207158
Tartrate decarboxylase (EC 4.1.1.73)	10	54	0.370371	0.202216	0.00207158
Tartrate dehydrogenase (EC 1.1.1.93)	10	54	0.370371	0.202216	0.00207158
Low molecular weight protein tyrosine phosphatase (EC 3.1.3.48)	5	27	0.370371	0.25899	0.037951
NADPH:quinone oxidoreductase 2	5	27	0.370371	0.25899	0.037951
Predicted N-ribosylNicotinamide CRP-like regulator	5	27	0.370371	0.25899	0.037951
Sugar phosphate isomerases/epimerases family protein YcjR	5	27	0.370371	0.25899	0.037951
Branched-chain amino acid aminotransferase (EC 2.6.1.42)	14	76	0.368422	0.176052	0.000193538
DNA primase (EC 2.7.7.-), Phage P4-associated	7	38	0.368422	0.229598	0.0107834
L-rhamnose isomerase (EC 5.3.1.14)	7	38	0.368422	0.229598	0.0107834
Replicative helicase RepA, Phage P4-associated	7	38	0.368422	0.229598	0.0107834
Zinc binding domain	7	38	0.368422	0.229598	0.0107834
Oligopeptide transport system permease protein OppB (TC 3.A.1.5.1)	34	185	0.367569	0.120446	3.89036e-09
ABC-type multidrug transport system, permease component	36	196	0.367348	0.117361	1.24726e-09
Aerobic C4-dicarboxylate transporter for fumarate, L-malate, D-malate, succunate	9	49	0.367348	0.208703	0.00317971
Dihydroorotase (EC 3.5.2.3)	22	120	0.366668	0.145154	2.67359e-06
Enoyl-CoA hydratase (EC 4.2.1.17)	73	399	0.365916	0.0848199	2.66608e-18
Glutamate transport ATP-binding protein	15	82	0.365855	0.169929	9.13509e-05
Glycogen synthase, ADP-glucose transglucosylase (EC 2.4.1.21)	15	82	0.365855	0.169929	9.13509e-05
Valyl-tRNA synthetase (EC 6.1.1.9)	30	165	0.363637	0.125804	1.92454e-08
Inner membrane protein translocase component YidC, long form	16	88	0.363637	0.164439	6.1366e-05
Lipoprotein releasing system transmembrane protein LolC	16	88	0.363637	0.164439	6.1366e-05
Octanoate-[acyl-carrier-protein]-protein-N-octanoyltransferase	10	55	0.363637	0.198399	0.00146919
Vanillate O-demethylase oxidoreductase (EC 1.14.13.-)	10	55	0.363637	0.198399	0.00146919
L-threonine 3-dehydrogenase (EC 1.1.1.103)	8	44	0.363637	0.215783	0.00490124
Phenazine biosynthesis protein PhzF like	6	33	0.363637	0.239088	0.0168143
Allantoicase (EC 3.5.3.4)	4	22	0.363637	0.272567	0.060515
Hemolysin activation/secretion protein associated with VreARI signalling system	4	22	0.363637	0.272567	0.060515
Enoyl-[acyl-carrier-protein] reductase [NADPH] (EC 1.3.1.10)	2	11	0.363637	0.324471	0.242268
Nucleoside-diphosphate sugar epimerase/dehydratase	2	11	0.363637	0.324471	0.242268
Phosphate starvation-inducible protein PhoH, predicted ATPase	25	138	0.36232	0.135708	2.81746e-07
Iron-sulfur cluster assembly protein SufB	17	94	0.361703	0.159493	2.8548e-05
Inosine-guanosine kinase (EC 2.7.1.73)	11	61	0.360657	0.189549	0.000987879
ATP-dependent protease La (EC 3.4.21.53) Type I	27	150	0.360001	0.130348	9.25358e-08
Urea ABC transporter, urea binding protein	9	50	0.360001	0.204356	0.00225709
Flagellar protein FliJ	7	39	0.358975	0.223495	0.00759086
putative cytochrome P450 hydroxylase	7	39	0.358975	0.223495	0.00759086
Hydroxylamine reductase (EC 1.7.-.-)	15	84	0.357144	0.165742	6.44352e-05
Uncharacterized protein ImpI/VasC	10	56	0.357144	0.19469	0.00149619
Oxaloacetate decarboxylase beta chain (EC 4.1.1.3)	5	28	0.357144	0.249457	0.0264209
Type II/IV secretion system secretin RcpA/CpaC, associated with Flp pilus assembly	5	28	0.357144	0.249457	0.0264209
tRNA (guanine46-N7-)-methyltransferase (EC 2.1.1.33)	11	62	0.35484	0.186364	0.000683392
Indole-3-glycerol phosphate synthase (EC 4.1.1.48)	14	79	0.354431	0.169109	9.70827e-05
Catechol 1,2-dioxygenase (EC 1.13.11.1)	3	17	0.352942	0.286679	0.0980803
CFA/I fimbrial major subunit	3	17	0.352942	0.286679	0.0980803
Chemotaxis protein CheV (EC 2.7.3.-)	3	17	0.352942	0.286679	0.0980803
Glutaryl-CoA dehydrogenase (EC 1.3.99.7)	3	17	0.352942	0.286679	0.0980803
Hemoglobin-like protein HbO	3	17	0.352942	0.286679	0.0980803
Outer membrane protein OprN	3	17	0.352942	0.286679	0.0980803
Phenylacetate-coenzyme A ligase (EC 6.2.1.30) PaaF	3	17	0.352942	0.286679	0.0980803
Phenylacetic acid degradation protein PaaE, ketothiolase	3	17	0.352942	0.286679	0.0980803
DNA-directed RNA polymerase beta subunit (EC 2.7.7.6)	37	210	0.352382	0.110958	7.89849e-11
Helicase PriA essential for oriC/DnaA-independent DNA replication	25	142	0.352114	0.131665	1.01322e-07
2-amino-3-ketobutyrate coenzyme A ligase (EC 2.3.1.29)	13	74	0.351352	0.172617	0.000146557
N-acetylglucosamine-6P-responsive transcriptional repressor NagC, ROK family	10	57	0.350878	0.191135	0.00103571
Uronate isomerase (EC 5.3.1.12)	10	57	0.350878	0.191135	0.00103571
Arabinose 5-phosphate isomerase (EC 5.3.1.13)	11	63	0.349207	0.183278	0.000476817
Glyoxalase family protein	15	86	0.348838	0.161701	4.68586e-05
Uracil phosphoribosyltransferase (EC 2.4.2.9)	16	92	0.347827	0.156989	2.16566e-05
2-methylcitrate dehydratase (EC 4.2.1.79)	8	46	0.347827	0.206041	0.00346526
Malto-oligosyltrehalose trehalohydrolase (EC 3.2.1.141)	4	23	0.347827	0.26042	0.0419183
Uncharacterized protein ybfE	4	23	0.347827	0.26042	0.0419183
Glycerol-3-phosphate dehydrogenase [NAD(P)+] (EC 1.1.1.94)	13	75	0.346668	0.17022	0.000104014
Methyl-directed repair DNA adenine methylase (EC 2.1.1.72)	9	52	0.346155	0.196193	0.0015739
Isoleucyl-tRNA synthetase (EC 6.1.1.5)	28	162	0.34568	0.122942	7.75798e-09
Pyruvate dehydrogenase E1 component (EC 1.2.4.1)	20	116	0.344828	0.141696	1.06466e-06
Polymyxin resistance protein ArnC, glycosyl transferase (EC 2.4.-.-)	10	58	0.344828	0.187704	0.000723274
2,4-dihydroxyhept-2-ene-1,7-dioic acid aldolase (EC 4.1.2.n4)	5	29	0.344828	0.24059	0.027184
Mgl repressor and galactose ultrainduction factor GalS, HTH-type transcriptional regulator	5	29	0.344828	0.24059	0.027184
Nitrite reductase [NAD(P)H] large subunit (EC 1.7.1.4)	21	122	0.344263	0.138532	7.21695e-07
Branched-chain alpha-keto acid dehydrogenase, E1 component, beta subunit (EC 1.2.4.4)	6	35	0.342858	0.224983	0.0118987
Urease accessory protein UreD	6	35	0.342858	0.224983	0.0118987
Branched-chain amino acid transport system permease protein LivM (TC 3.A.1.4.1)	25	146	0.342467	0.127888	3.59652e-08
NADH-ubiquinone oxidoreductase chain C (EC 1.6.5.3)	20	117	0.341881	0.14043	1.06882e-06
Sialic acid-induced transmembrane protein YjhT(NanM), possible mutarotase	7	41	0.341464	0.212211	0.00530169
Acyl dehydratase	8	47	0.340426	0.201499	0.00239848
Hydroxymethylglutaryl-CoA lyase (EC 4.1.3.4)	8	47	0.340426	0.201499	0.00239848
Mlr7403 protein	10	59	0.338984	0.18439	0.00051016
Universal stress protein family	11	65	0.338462	0.177403	0.000341727
Ribonuclease BN (EC 3.1.-.-)	12	71	0.338029	0.171191	0.000156576
Thymidylate synthase (EC 2.1.1.45)	13	77	0.337663	0.165641	7.24126e-05
2,4-dienoyl-CoA reductase [NADPH] (EC 1.3.1.34)	27	160	0.337501	0.121817	5.70965e-09
Polysaccharide deacetylase	14	83	0.33735	0.160552	3.37904e-05
Transcription termination factor Rho	15	89	0.337079	0.156002	1.59032e-05
Alpha-galactosidase (EC 3.2.1.22)	17	101	0.336634	0.147925	5.04378e-06
Membrane fusion protein of RND family multidrug efflux pump	19	113	0.336284	0.141054	1.10511e-06
NADH-ubiquinone oxidoreductase chain D (EC 1.6.5.3)	20	119	0.336135	0.137955	5.23186e-07
NADP-dependent malic enzyme (EC 1.1.1.40)	24	143	0.335665	0.12744	3.7394e-08
Putrescine transport ATP-binding protein PotA (TC 3.A.1.11.1)	24	143	0.335665	0.12744	3.7394e-08
Adenylate cyclase (EC 4.6.1.1)	33	197	0.335026	0.110669	9.62391e-11
Hemolysins and related proteins containing CBS domains	20	120	0.333334	0.13675	5.37188e-07
Ammonium transporter	18	108	0.333334	0.142956	1.64441e-06
GTP-binding and nucleic acid-binding protein YchF	18	108	0.333334	0.142956	1.64441e-06
Exodeoxyribonuclease VII large subunit (EC 3.1.11.6)	16	96	0.333334	0.150137	7.48271e-06
Threonine synthase (EC 4.2.3.1)	15	90	0.333334	0.154192	1.61558e-05
Preprotein translocase secY subunit (TC 3.A.5.1.1)	14	84	0.333334	0.158567	2.38778e-05
Ornithine cyclodeaminase (EC 4.3.1.12)	10	60	0.333334	0.181185	0.00051276
Phosphoribosyl-ATP pyrophosphatase (EC 3.6.1.31)	10	60	0.333334	0.181185	0.00051276
FKBP-type peptidyl-prolyl cis-trans isomerase fklB (EC 5.2.1.8)	9	54	0.333334	0.188658	0.00113195
[NiFe] hydrogenase metallocenter assembly protein HypE	6	36	0.333334	0.218533	0.008143
Pca regulon regulatory protein PcaR	5	30	0.333334	0.232356	0.0184256
Ribose 5-phosphate isomerase B (EC 5.3.1.6)	5	30	0.333334	0.232356	0.0184256
3,4-dihydroxyphenylacetate 2,3-dioxygenase (EC 1.13.11.15)	4	24	0.333334	0.249248	0.0426636
Heme A synthase, cytochrome oxidase biogenesis protein Cox15-CtaA	4	24	0.333334	0.249248	0.0426636
HPr kinase/phosphorylase (EC 2.7.1.-) (EC 2.7.4.-)	4	24	0.333334	0.249248	0.0426636
Membrane Protein Functionally coupled to the MukBEF Chromosome Partitioning Mechanism	4	24	0.333334	0.249248	0.0426636
RNA polymerase sigma factor	4	24	0.333334	0.249248	0.0426636
Deoxyadenosine kinase (EC 2.7.1.76)	3	18	0.333334	0.270435	0.0673547
Deoxyguanosine kinase (EC 2.7.1.113)	3	18	0.333334	0.270435	0.0673547
Intracellular PHB depolymerase (EC 3.1.1.-)	3	18	0.333334	0.270435	0.0673547
Microsomal dipeptidase (EC 3.4.13.19)	3	18	0.333334	0.270435	0.0673547
Phosphocarrier protein, nitrogen regulation associated	3	18	0.333334	0.270435	0.0673547
PTS system, galactitol-specific IIB component (EC 2.7.1.69)	3	18	0.333334	0.270435	0.0673547
Redox-sensitive transcriptional regulator (AT-rich DNA-binding protein)	3	18	0.333334	0.270435	0.0673547
5-aminopentanamidase (EC 3.5.1.30)	2	12	0.333334	0.2971	0.162948
CRISPR-associated protein, Cse3 family	2	12	0.333334	0.2971	0.162948
Glycine betaine ABC transport system, ATP-binding protein OpuAA (EC 3.6.3.32)	2	12	0.333334	0.2971	0.162948
GTP-sensing transcriptional pleiotropic repressor codY	2	12	0.333334	0.2971	0.162948
Kynurenine formamidase, bacterial (EC 3.5.1.9)	2	12	0.333334	0.2971	0.162948
MaoC-like dehydratase	2	12	0.333334	0.2971	0.162948
Nicotinamide phosphoribosyltransferase (EC 2.4.2.12)	2	12	0.333334	0.2971	0.162948
Thiol:disulfide oxidoreductase related to ResA	2	12	0.333334	0.2971	0.162948
acyl-CoA synthetase	1	6	0.333334	0.326083	0.43667
Aerobic cobaltochelatase CobT subunit (EC 6.6.1.2)	1	6	0.333334	0.326083	0.43667
Anaerobic sulfite reductase subunit B	1	6	0.333334	0.326083	0.43667
Arginine permease RocE	1	6	0.333334	0.326083	0.43667
Coenzyme PQQ synthesis protein D	1	6	0.333334	0.326083	0.43667
CRISPR-associated protein, Csd1 family	1	6	0.333334	0.326083	0.43667
Diaminobutyrate-pyruvate aminotransferase (EC 2.6.1.46)	1	6	0.333334	0.326083	0.43667
DNA-binding response regulator, LuxR family, near polyamine transporter	1	6	0.333334	0.326083	0.43667
Formate dehydrogenase-O, iron-sulfur subunit (EC 1.2.1.2)	1	6	0.333334	0.326083	0.43667
Gluconate dehydratase (EC 4.2.1.39)	1	6	0.333334	0.326083	0.43667
Glucose ABC transport system, inner membrane component 2	1	6	0.333334	0.326083	0.43667
N-acetylglucosamine-1-phosphate uridyltransferase eukaryotic (EC 2.7.7.23)	1	6	0.333334	0.326083	0.43667
NAD-dependent formate dehydrogenase beta subunit	1	6	0.333334	0.326083	0.43667
Negative regulator of flagellin synthesis	1	6	0.333334	0.326083	0.43667
NG,NG-dimethylarginine dimethylaminohydrolase 1 (EC 3.5.3.18)	1	6	0.333334	0.326083	0.43667
Phage baseplate assembly protein V	1	6	0.333334	0.326083	0.43667
Protein GlcG	1	6	0.333334	0.326083	0.43667
putative ATP-dependent DNA helicase YjcD	1	6	0.333334	0.326083	0.43667
Putative formate dehydrogenase iron-sulfur subunit (EC 1.2.1.2)	1	6	0.333334	0.326083	0.43667
Putative n-hydroxybenzoate hydroxylase	1	6	0.333334	0.326083	0.43667
Substrate-specific component CbrT of predicted cobalamin ECF transporter	1	6	0.333334	0.326083	0.43667
Thiamin-phosphate pyrophosphorylase-like protein	1	6	0.333334	0.326083	0.43667
Transcriptional regulator GbuR	1	6	0.333334	0.326083	0.43667
Tyrosine-protein kinase transmembrane modulator EpsC	1	6	0.333334	0.326083	0.43667
ABC-type multidrug transport system, ATPase component	22	133	0.330828	0.13028	8.2004e-08
Large exoproteins involved in heme utilization or adhesion	32	194	0.329898	0.1104	6.92102e-11
Phosphate:acyl-ACP acyltransferase PlsX	15	91	0.329671	0.152426	1.11105e-05
ComM-related protein	14	85	0.329413	0.15663	2.39639e-05
Methenyltetrahydrofolate cyclohydrolase (EC 3.5.4.9)	14	85	0.329413	0.15663	2.39639e-05
MG(2+) CHELATASE FAMILY PROTEIN	14	85	0.329413	0.15663	2.39639e-05
Ribosomal protein L11 methyltransferase (EC 2.1.1.-)	14	85	0.329413	0.15663	2.39639e-05
Beta-lactamase class C and other penicillin binding proteins	13	79	0.329115	0.161238	5.21381e-05
Transcription-repair coupling factor	35	213	0.328639	0.105663	7.49158e-12
Signal transduction histidine kinase CheA (EC 2.7.3.-)	28	171	0.327486	0.116144	9.44896e-10
Cytoplasmic alpha-amylase (EC 3.2.1.1)	9	55	0.327274	0.185094	0.000770511
Mannonate dehydratase (EC 4.2.1.8)	8	49	0.326531	0.192976	0.00170468
Pyruvate kinase (EC 2.7.1.40)	31	190	0.326317	0.110673	1.0322e-10
Putative deoxyribonuclease YcfH	13	80	0.325001	0.15915	3.55706e-05
Maleylacetoacetate isomerase (EC 5.2.1.2)	6	37	0.324325	0.212441	0.00561824
Ornithine decarboxylase (EC 4.1.1.17)	22	136	0.32353	0.127267	4.01524e-08
Lipoprotein releasing system ATP-binding protein LolD	11	68	0.32353	0.169257	0.000114395
Kup system potassium uptake protein	16	99	0.323233	0.14539	3.70408e-06
Phenylacetaldehyde dehydrogenase (EC 1.2.1.39)	5	31	0.322581	0.224657	0.0125589
SeqA protein, negative modulator of initiation of replication	5	31	0.322581	0.224657	0.0125589
Queuosine Biosynthesis QueE Radical SAM	9	56	0.321429	0.181668	0.000529571
Asp-X dipeptidase	13	81	0.320988	0.157084	2.4543e-05
Protoporphyrinogen IX oxidase, novel form, HemJ (EC 1.3.-.-)	4	25	0.320001	0.239052	0.0287212
Twin-arginine translocation protein TatB	7	44	0.318183	0.197267	0.00257133
High-affinity choline uptake protein BetT	17	107	0.317758	0.139261	8.32905e-07
Glutamate Aspartate transport system permease protein GltK (TC 3.A.1.3.4)	13	82	0.317074	0.155108	1.71387e-05
GTP pyrophosphokinase (EC 2.7.6.5), (p)ppGpp synthetase I	22	139	0.316547	0.124394	1.96503e-08
DNA-directed RNA polymerase beta' subunit (EC 2.7.7.6)	36	228	0.31579	0.100052	4.23895e-13
Triosephosphate isomerase (EC 5.3.1.1)	12	76	0.31579	0.15947	3.64964e-05
Sodium/alanine symporter	3	19	0.31579	0.255935	0.0677518
Sucrose phosphorylase (EC 2.4.1.7)	3	19	0.31579	0.255935	0.0677518
Uncharacterized protein, similar to the N-terminal domain of Lon protease	3	19	0.31579	0.255935	0.0677518
UDP-4-amino-4-deoxy-L-arabinose--oxoglutarate aminotransferase (EC 2.6.1.-)	11	70	0.314286	0.164261	7.84622e-05
Chromosome segregation ATPase	5	32	0.312501	0.217446	0.00863436
Flp pilus assembly protein TadB	5	32	0.312501	0.217446	0.00863436
NTP pyrophosphohydrolases including oxidative damage repair enzymes	5	32	0.312501	0.217446	0.00863436
ADP-ribose pyrophosphatase (EC 3.6.1.13)	12	77	0.311689	0.157312	2.55243e-05
Peptide chain release factor 1	14	90	0.311112	0.147584	5.521e-06
Flagellar biosynthesis protein FliL	7	45	0.311112	0.192741	0.00174543
Siderophore biosynthesis protein, monooxygenase	7	45	0.311112	0.192741	0.00174543
5-methyltetrahydrofolate--homocysteine methyltransferase (EC 2.1.1.13)	27	174	0.310346	0.111521	1.59e-10
4-aminobutyraldehyde dehydrogenase (EC 1.2.1.19)	9	58	0.310346	0.175181	0.000374227
Nicotinate-nucleotide--dimethylbenzimidazole phosphoribosyltransferase (EC 2.4.2.21)	9	58	0.310346	0.175181	0.000374227
Deoxyribose-phosphate aldolase (EC 4.1.2.4)	11	71	0.30986	0.161839	5.42664e-05
Imidazoleglycerol-phosphate dehydratase (EC 4.2.1.19)	13	84	0.309525	0.151253	1.18303e-05
Protein export cytoplasm protein SecA ATPase RNA helicase (TC 3.A.5.1.1)	28	181	0.309393	0.109406	7.77724e-11
Putative formate dehydrogenase oxidoreductase protein	10	65	0.307693	0.166767	0.000116516
Manganese-dependent inorganic pyrophosphatase (EC 3.6.1.1)	4	26	0.307693	0.229641	0.0194512
Teichoic acid export ATP-binding protein TagH (EC 3.6.3.40)	4	26	0.307693	0.229641	0.0194512
Transcriptional regulator RutR of pyrimidine catabolism (TetR family)	4	26	0.307693	0.229641	0.0194512
CRISPR-associated protein Cas2	2	13	0.307693	0.273989	0.167584
Nitrous-oxide reductase (EC 1.7.99.6)	2	13	0.307693	0.273989	0.167584
Substrate-specific component STY3230 of queuosine-regulated ECF transporter	2	13	0.307693	0.273989	0.167584
Type cbb3 cytochrome oxidase biogenesis protein CcoS, involved in heme b insertion	2	13	0.307693	0.273989	0.167584
Type II secretion outermembrane pore forming protein (PulD)	2	13	0.307693	0.273989	0.167584
Type IV fimbrial biogenesis protein PilV	2	13	0.307693	0.273989	0.167584
Oligopeptide ABC transporter, periplasmic oligopeptide-binding protein OppA (TC 3.A.1.5.1)	43	280	0.307144	0.0897234	2.77187e-16
Alanyl-tRNA synthetase (EC 6.1.1.7)	27	176	0.306819	0.110193	1.12408e-10
Molybdopterin biosynthesis protein MoeA	15	98	0.306123	0.141063	1.80715e-06
UDP-N-acetylglucosamine--N-acetylmuramyl-(pentapeptide) pyrophosphoryl-undecaprenol N-acetylglucosamine transferase (EC 2.4.1.227)	14	92	0.304348	0.1442	3.90104e-06
Methylmalonate-semialdehyde dehydrogenase (EC 1.2.1.27)	7	46	0.304348	0.188417	0.00119738
Putrescine importer	12	79	0.303798	0.153204	1.74107e-05
Pyruvate formate-lyase (EC 2.3.1.54)	46	303	0.303631	0.0859738	1.02869e-17
Branched-chain amino acid transport ATP-binding protein LivF (TC 3.A.1.4.1)	16	106	0.301887	0.135368	6.01665e-07
UDP-N-acetylmuramate--alanine ligase (EC 6.3.2.8)	16	106	0.301887	0.135368	6.01665e-07
Thiol peroxidase, Tpx-type (EC 1.11.1.15)	8	53	0.301887	0.177941	0.00055533
Transcription elongation factor GreA	8	53	0.301887	0.177941	0.00055533
Uroporphyrinogen III decarboxylase (EC 4.1.1.37)	8	53	0.301887	0.177941	0.00055533
Cell division protein FtsQ	11	73	0.301371	0.157206	3.75906e-05
Transaldolase (EC 2.2.1.2)	20	133	0.300753	0.122801	1.39092e-08
GTP-binding protein Obg	15	100	0.300001	0.138128	8.59096e-07
benzoate dioxygenase, ferredoxin reductase component	3	20	0.300001	0.242909	0.0451097
FIG015287: Zinc protease	3	20	0.300001	0.242909	0.0451097
Predicted aminoglycoside phosphotransferase	3	20	0.300001	0.242909	0.0451097
Pyruvate formate-lyase activating enzyme (EC 1.97.1.4)	19	127	0.299213	0.124824	2.94271e-08
Porphobilinogen synthase (EC 4.2.1.24)	10	67	0.298508	0.161561	8.20006e-05
Outer membrane protein A precursor	14	94	0.297873	0.141032	1.81211e-06
Butyryl-CoA dehydrogenase (EC 1.3.99.2)	38	256	0.296876	0.0915357	1.79803e-15
Glycolate dehydrogenase (EC 1.1.99.14), FAD-binding subunit GlcE	4	27	0.296298	0.220942	0.0132978
Glutamate Aspartate periplasmic binding protein precursor GltI (TC 3.A.1.3.4)	17	115	0.295654	0.12915	1.35076e-07
Adenosylcobinamide-phosphate guanylyltransferase (EC 2.7.7.62)	5	34	0.29412	0.204313	0.00586577
Dihydropteridine reductase (EC 1.5.1.34)	5	34	0.29412	0.204313	0.00586577
Type IV pilus biogenesis protein PilN	5	34	0.29412	0.204313	0.00586577
N-acetylmuramoyl-L-alanine amidase (EC 3.5.1.28)	42	286	0.293709	0.0865526	2.10544e-17
3-ketoacyl-CoA thiolase (EC 2.3.1.16)	49	334	0.293416	0.0806166	4.12388e-20
Urea ABC transporter, permease protein UrtC	6	41	0.292686	0.191161	0.00179879
Peptide chain release factor 2	12	82	0.292686	0.147391	8.28097e-06
Proline-specific permease proY	7	48	0.291671	0.180326	0.000822931
Thymidylate kinase (EC 2.7.4.9)	14	96	0.29167	0.137971	1.26213e-06
N-acetylneuraminate lyase (EC 4.1.3.3)	8	55	0.290913	0.171262	0.000256092
Inosine-uridine preferring nucleoside hydrolase (EC 3.2.2.1)	16	110	0.290913	0.130266	1.94564e-07
3',5'-cyclic-nucleotide phosphodiesterase (EC 3.1.4.17)	9	62	0.290327	0.163499	0.000120087
DedA protein	9	62	0.290327	0.163499	0.000120087
ATP-dependent DNA helicase RecG (EC 3.6.1.-)	18	124	0.290327	0.123773	3.02675e-08
5'-nucleotidase (EC 3.1.3.5)	22	153	0.287588	0.112529	4.96526e-10
Bacitracin export ATP-binding protein BceA	1	7	0.285721	0.279378	0.283035
Cell envelope-associated transcriptional attenuator LytR-CpsA-Psr, subfamily F1 (as in PMID19099556)	1	7	0.285721	0.279378	0.283035
CRISPR-associated protein, Cse2 family	1	7	0.285721	0.279378	0.283035
Fe2+/Zn2+ uptake regulation proteins	1	7	0.285721	0.279378	0.283035
FIG118045: Phage immunity repressor protein	1	7	0.285721	0.279378	0.283035
Glucose ABC transport system, inner membrane component 1	1	7	0.285721	0.279378	0.283035
Glucose ABC transporter, ATP-binding subunit (EC 3.6.3.-)	1	7	0.285721	0.279378	0.283035
Indole-3-pyruvate decarboxylase (EC 4.1.1.74)	1	7	0.285721	0.279378	0.283035
L-arabonate dehydratase (EC 4.2.1.25)	1	7	0.285721	0.279378	0.283035
N-methylhydantoinase (ATP-hydrolyzing) (EC 3.5.2.14)	1	7	0.285721	0.279378	0.283035
Nitric-oxide reductase subunit B (EC 1.7.99.7)	1	7	0.285721	0.279378	0.283035
Nitric-oxide reductase subunit C (EC 1.7.99.7)	1	7	0.285721	0.279378	0.283035
Organosulfonate utilization protein SsuF	1	7	0.285721	0.279378	0.283035
Programmed cell death antitoxin MazE	1	7	0.285721	0.279378	0.283035
Putative prenyltransferase, contains 1,4-dihydroxy-2-naphthoate octaprenyltransferase domain	1	7	0.285721	0.279378	0.283035
Pyoverdin biosynthesis protein PvdH, L-2,4-diaminobutyrate:2-oxoglutarate aminotransferase (EC 2.6.1.76)	1	7	0.285721	0.279378	0.283035
sulfonate monooxygenase	1	7	0.285721	0.279378	0.283035
TldE/PmbA family protein, Beta/Gamma-proteobacterial subgroup	1	7	0.285721	0.279378	0.283035
Transcriptional repressor of arabinoside utilization operon, GntR family	1	7	0.285721	0.279378	0.283035
TrkA-N:Sodium/hydrogen exchanger	1	7	0.285721	0.279378	0.283035
Two-component response regulator PfeR, enterobactin	1	7	0.285721	0.279378	0.283035
CRISPR-associated protein, Cse1 family	2	14	0.285721	0.254199	0.109334
LysR family transcriptional regulator PA2758	2	14	0.285721	0.254199	0.109334
Phage NinG rap recombination	2	14	0.285721	0.254199	0.109334
Putative amidotransferase similar to cobyric acid synthase	2	14	0.285721	0.254199	0.109334
Putative glutathione transporter, permease component	2	14	0.285721	0.254199	0.109334
Salicylate hydroxylase (EC 1.14.13.1)	2	14	0.285721	0.254199	0.109334
Type IV fimbrial biogenesis protein FimT	2	14	0.285721	0.254199	0.109334
Phenylacetate-CoA oxygenase, PaaI subunit	3	21	0.285721	0.231148	0.0302395
Urease accessory protein UreF	3	21	0.285721	0.231148	0.0302395
2-methylcitrate dehydratase FeS dependent (EC 4.2.1.79)	4	28	0.285721	0.212881	0.0133622
D-alanine--D-alanine ligase A (EC 6.3.2.4)	4	28	0.285721	0.212881	0.0133622
Multidrug efflux transporter MexF	4	28	0.285721	0.212881	0.0133622
Glutathione S-transferase, zeta (EC 2.5.1.18)	5	35	0.285721	0.198327	0.00395252
Proposed lipoate regulatory protein YbeD	5	35	0.285721	0.198327	0.00395252
Sensory histidine kinase AtoS	5	35	0.285721	0.198327	0.00395252
Arginine N-succinyltransferase (EC 2.3.1.109)	6	42	0.285721	0.186471	0.00183241
Mutator mutT protein (7,8-dihydro-8-oxoguanine-triphosphatase) (EC 3.6.1.-)	6	42	0.285721	0.186471	0.00183241
Hypoxanthine-guanine phosphoribosyltransferase (EC 2.4.2.8)	9	63	0.285721	0.160818	8.07113e-05
Glycerol-3-phosphate ABC transporter, periplasmic glycerol-3-phosphate-binding protein (TC 3.A.1.1.3)	10	70	0.285721	0.154411	2.59298e-05
Glycine cleavage system transcriptional activator	10	70	0.285721	0.154411	2.59298e-05
Type IV fimbrial assembly protein PilC	10	70	0.285721	0.154411	2.59298e-05
Type IV fimbrial assembly, ATPase PilB	11	77	0.285721	0.148781	1.20312e-05
Ribosome small subunit-stimulated GTPase EngC	12	84	0.285721	0.143733	3.86662e-06
Thiamin biosynthesis lipoprotein ApbE	13	91	0.285721	0.1392	1.82334e-06
Glutamine synthetase type I (EC 6.3.1.2)	16	112	0.285721	0.12784	8.93605e-08
Phosphomannomutase (EC 5.4.2.8)	16	112	0.285721	0.12784	8.93605e-08
Flagellar biosynthesis protein FlhA	20	141	0.283696	0.115529	1.46924e-09
UDP-N-acetylmuramoylalanine--D-glutamate ligase (EC 6.3.2.9)	14	99	0.282836	0.133648	6.03449e-07
Dipeptide transport system permease protein DppC (TC 3.A.1.5.2)	24	170	0.282361	0.106342	2.46933e-11
Outer membrane protein YfgL, lipoprotein component of the protein assembly complex (forms a complex with YaeT, YfiO, and NlpB)	11	78	0.28206	0.146807	8.17062e-06
LSU m3Psi1915 methyltransferase RlmH	10	71	0.281699	0.152162	2.60174e-05
Acyl-CoA dehydrogenase, short-chain specific (EC 1.3.99.2)	25	178	0.280908	0.10392	8.02203e-12
Bacterioferritin	8	57	0.280711	0.165065	0.000175359
Lactam utilization protein LamB	8	57	0.280711	0.165065	0.000175359
Phosphoethanolamine transferase specific for the outer Kdo residue of lipopolysaccharide	8	57	0.280711	0.165065	0.000175359
Putative cytoplasmic protein USSDB7A	8	57	0.280711	0.165065	0.000175359
Flagellar M-ring protein FliF	15	107	0.280383	0.12877	1.28976e-07
Dipeptide transport system permease protein DppB (TC 3.A.1.5.2)	21	150	0.28001	0.111607	3.27901e-10
2-C-methyl-D-erythritol 2,4-cyclodiphosphate synthase (EC 4.6.1.12)	6	43	0.27908	0.182017	0.00121603
ATP-dependent protease HslV (EC 3.4.25.-)	6	43	0.27908	0.182017	0.00121603
Predicted endonuclease distantly related to archaeal Holliday junction resolvase	5	36	0.277788	0.192681	0.00269517
Ribonucleotide reductase of class III (anaerobic), large subunit (EC 1.17.4.2)	14	101	0.277239	0.13091	2.71003e-07
Iron siderophore receptor protein	9	65	0.276934	0.1557	5.68664e-05
Succinylornithine transaminase (EC 2.6.1.81)	9	65	0.276934	0.1557	5.68664e-05
Nitric oxide-dependent regulator DnrN or NorA	4	29	0.275874	0.205386	0.00884769
GTP cyclohydrolase I (EC 3.5.4.16) type 1	11	80	0.275012	0.143039	5.64842e-06
ABC transporter, periplasmic spermidine putrescine-binding protein PotD (TC 3.A.1.11.1)	21	153	0.274522	0.109377	1.52025e-10
Glucose-selective porin OprB	3	22	0.27274	0.220474	0.0312616
YrbA protein	3	22	0.27274	0.220474	0.0312616
Indolepyruvate ferredoxin oxidoreductase, alpha and beta subunits	6	44	0.27274	0.177775	0.000816705
Formamidopyrimidine-DNA glycosylase (EC 3.2.2.23)	9	66	0.27274	0.1533	3.75498e-05
FIG004453: protein YceG like	12	88	0.27274	0.136973	1.22337e-06
Exoribonuclease II (EC 3.1.13.1)	11	81	0.271618	0.141214	3.77298e-06
Oxidoreductase, aldo/keto reductase family	11	81	0.271618	0.141214	3.77298e-06
DNA-directed RNA polymerase omega subunit (EC 2.7.7.6)	8	59	0.2712	0.159302	8.01236e-05
Porphobilinogen deaminase (EC 2.5.1.61)	8	59	0.2712	0.159302	8.01236e-05
Thiol peroxidase, Bcp-type (EC 1.11.1.15)	8	59	0.2712	0.159302	8.01236e-05
Type II/IV secretion system ATP hydrolase TadA/VirB11/CpaF, TadA subfamily	5	37	0.270284	0.187345	0.00270829
Flagellar biosynthesis protein FliR	10	74	0.270284	0.145811	1.22661e-05
Xanthine dehydrogenase, molybdenum binding subunit (EC 1.17.1.4)	10	74	0.270284	0.145811	1.22661e-05
High-affinity branched-chain amino acid transport system permease protein LivH (TC 3.A.1.4.1)	22	163	0.269953	0.105369	2.31804e-11
tRNA pseudouridine synthase A (EC 4.2.1.70)	12	89	0.269677	0.135384	1.22875e-06
Iron-uptake factor PiuB	7	52	0.269245	0.166101	0.000254936
3'-to-5' exoribonuclease RNase R	23	171	0.269021	0.102967	7.52108e-12
Riboflavin synthase eubacterial/eukaryotic (EC 2.5.1.9)	9	67	0.268672	0.150923	2.51384e-05
4-Hydroxy-2-oxoglutarate aldolase (EC 4.1.3.16)	11	82	0.268308	0.139437	2.55774e-06
Exonuclease SbcD	11	82	0.268308	0.139437	2.55774e-06
Phosphate transport system permease protein PstA (TC 3.A.1.7.1)	11	82	0.268308	0.139437	2.55774e-06
FIG002207: Probable transmembrane protein	2	15	0.266683	0.237091	0.0714333
Homogentisate 1,2-dioxygenase (EC 1.13.11.5)	2	15	0.266683	0.237091	0.0714333
Malate Na(+) symporter	2	15	0.266683	0.237091	0.0714333
Phenylpropionate dioxygenase and related ring-hydroxylating dioxygenases, large terminal subunit	2	15	0.266683	0.237091	0.0714333
Poly(glycerol-phosphate) alpha-glucosyltransferase (EC 2.4.1.52)	2	15	0.266683	0.237091	0.0714333
Predicted carboxypeptidase	2	15	0.266683	0.237091	0.0714333
putative 4-hydroxybenzoyl-CoA thioesterase	2	15	0.266683	0.237091	0.0714333
Quinate/shikimate dehydrogenase [Pyrroloquinoline-quinone] (EC 1.1.99.25)	2	15	0.266683	0.237091	0.0714333
Response regulator NasT	2	15	0.266683	0.237091	0.0714333
Substrate-specific component RibU of riboflavin ECF transporter	2	15	0.266683	0.237091	0.0714333
2-dehydro-3-deoxygalactonokinase (EC 2.7.1.58)	4	30	0.266683	0.1984	0.00592207
C4-type zinc finger protein, DksA/TraR family	4	30	0.266683	0.1984	0.00592207
Integration host factor beta subunit	4	30	0.266683	0.1984	0.00592207
Shikimate kinase III (EC 2.7.1.71)	4	30	0.266683	0.1984	0.00592207
Potassium channel protein	6	45	0.266683	0.1737	0.000555882
Lysyl-tRNA synthetase (class II) (EC 6.1.1.6)	20	150	0.266682	0.108327	1.49196e-10
Oligopeptide transport system permease protein OppC (TC 3.A.1.5.1)	17	128	0.265641	0.11557	2.88148e-09
Holliday junction DNA helicase RuvA	11	83	0.265077	0.137645	2.65412e-06
Macrolide-specific efflux protein MacA	11	83	0.265077	0.137645	2.65412e-06
Molybdenum transport system permease protein ModB (TC 3.A.1.8.1)	9	68	0.264723	0.14863	1.7076e-05
Hexuronate transporter	16	121	0.26448	0.117987	9.13428e-09
Periplasmic beta-glucosidase (EC 3.2.1.21)	16	121	0.26448	0.117987	9.13428e-09
Glucosamine--fructose-6-phosphate aminotransferase [isomerizing] (EC 2.6.1.16)	17	129	0.263583	0.114647	1.96466e-09
Methionine ABC transporter ATP-binding protein	22	167	0.26349	0.102726	7.28187e-12
Phosphate ABC transporter, periplasmic phosphate-binding protein PstS (TC 3.A.1.7.1)	15	114	0.263175	0.12059	1.85534e-08
2-dehydro-3-deoxygluconate kinase (EC 2.7.1.45)	8	61	0.262313	0.153923	5.39091e-05
Glycerol-3-phosphate ABC transporter, ATP-binding protein UgpC (TC 3.A.1.1.3)	8	61	0.262313	0.153923	5.39091e-05
Formate hydrogenlyase subunit 6	3	23	0.260888	0.210741	0.0202848
Methylglutaconyl-CoA hydratase (EC 4.2.1.18)	3	23	0.260888	0.210741	0.0202848
Nicotinamidase/isochorismatase family protein	3	23	0.260888	0.210741	0.0202848
Periplasmic divalent cation tolerance protein cutA	3	23	0.260888	0.210741	0.0202848
LysR family transcriptional regulator lrhA	6	46	0.260888	0.169842	0.000558979
Molybdopterin-guanine dinucleotide biosynthesis protein MobA	6	46	0.260888	0.169842	0.000558979
Oligopeptide transport ATP-binding protein OppD (TC 3.A.1.5.1)	13	100	0.260019	0.126234	1.20303e-07
3-isopropylmalate dehydratase small subunit (EC 4.2.1.33)	10	77	0.259759	0.139956	3.65732e-06
Lysophospholipid transporter LplT	7	54	0.259278	0.159759	0.000116086
Glutathione S-transferase family protein	4	31	0.258084	0.191872	0.00614158
Urea ABC transporter, ATPase protein UrtD	4	31	0.258084	0.191872	0.00614158
Maltose/maltodextrin ABC transporter, permease protein MalF	8	62	0.258084	0.151364	3.60479e-05
Aspartokinase (EC 2.7.2.4)	33	256	0.257832	0.0841057	1.08912e-17
Twitching motility protein PilT	9	70	0.257163	0.14425	1.14773e-05
Delta-1-pyrroline-5-carboxylate dehydrogenase (EC 1.5.1.12)	27	210	0.257163	0.091622	8.47619e-15
Deoxyguanosinetriphosphate triphosphohydrolase (EC 3.1.5.1)	14	109	0.256901	0.120965	2.61778e-08
Flagellar hook-length control protein FliK	19	148	0.256777	0.106469	9.74958e-11
Malate synthase G (EC 2.3.3.9)	5	39	0.256431	0.17757	0.00119512
Queuosine biosynthesis QueD, PTPS-I	5	39	0.256431	0.17757	0.00119512
Peptidyl-prolyl cis-trans isomerase ppiB (EC 5.2.1.8)	6	47	0.25534	0.16614	0.000368094
2,3,4,5-tetrahydropyridine-2,6-dicarboxylate N-succinyltransferase (EC 2.3.1.117)	8	63	0.25399	0.148885	2.44688e-05
L-proline glycine betaine ABC transport system permease protein ProW (TC 3.A.1.12.1)	8	63	0.25399	0.148885	2.44688e-05
ABC-type tungstate transport system, periplasmic binding protein	1	8	0.250023	0.244385	0.28791
ATPase component BioM of energizing module of biotin ECF transporter	1	8	0.250023	0.244385	0.28791
DNA replication intiation control protein YabA	1	8	0.250023	0.244385	0.28791
Glycine betaine ABC transport system, glycine betaine-binding protein OpuAC	1	8	0.250023	0.244385	0.28791
Glycine betaine/L-proline ABC transporter, glycine betaine/L-proline- binding/permease protein	1	8	0.250023	0.244385	0.28791
Membrane protein, suppressor for copper-sensitivity ScsB	1	8	0.250023	0.244385	0.28791
Methylmalonyl-CoA decarboxylase, beta chain (EC 4.1.1.41)	1	8	0.250023	0.244385	0.28791
Nitric oxide reductase activation protein NorQ	1	8	0.250023	0.244385	0.28791
Phenylacetate-CoA oxygenase, PaaH subunit	1	8	0.250023	0.244385	0.28791
phosphotransbutyrylase (EC 2.3.1.19)	1	8	0.250023	0.244385	0.28791
Probable thioesterase involved in non-ribosomal peptide biosynthesis, PA2411 homolog	1	8	0.250023	0.244385	0.28791
PTS system, lactose-specific IIA component (EC 2.7.1.69)	1	8	0.250023	0.244385	0.28791
Zinc transporter, ZIP family	1	8	0.250023	0.244385	0.28791
2-methylaconitate cis-trans isomerase	2	16	0.250023	0.22214	0.0470805
Alpha-D-GlcNAc alpha-1,2-L-rhamnosyltransferase (EC 2.4.1.-)	2	16	0.250023	0.22214	0.0470805
Dna binding response regulator PrrA (RegA)	2	16	0.250023	0.22214	0.0470805
Probable glutathione S-transferase (EC 2.5.1.18), YfcG homolog	2	16	0.250023	0.22214	0.0470805
Putative Zn-dependent oxidoreductase PA5234	2	16	0.250023	0.22214	0.0470805
Sortase A, LPXTG specific	3	24	0.250023	0.20183	0.0132755
Succinyl-CoA:3-ketoacid-coenzyme A transferase subunit B (EC 2.8.3.5)	3	24	0.250023	0.20183	0.0132755
Type II/IV secretion system ATPase TadZ/CpaE, associated with Flp pilus assembly	4	32	0.250023	0.185821	0.00397483
Muramoyltetrapeptide carboxypeptidase (EC 3.4.17.13)	6	48	0.250023	0.162595	0.00024587
Sigma factor RpoE negative regulatory protein RseA	6	48	0.250023	0.162595	0.00024587
Deoxycytidine triphosphate deaminase (EC 3.5.4.13)	7	56	0.250023	0.153908	7.68176e-05
Murein-DD-endopeptidase (EC 3.4.99.-)	7	56	0.250023	0.153908	7.68176e-05
DNA recombination-dependent growth factor C	8	64	0.250023	0.146543	2.46675e-05
[truncated: 881 more rows]

## Sheet: GO
Subsystems	Number of hits in exact matches (from 276,546 matches)	Number of hits in control sample (from 553,092 control matches)	Enrichment	Enrichment error ci95	p value	Annotation
GO:0009767	1	0	Inf	Inf	0.333334	photosynthetic electron transport chain
GO:0016157	2	0	Inf	Inf	0.111112	sucrose synthase activity
GO:0009522	2	0	Inf	Inf	0.111112	photosystem I
GO:0009521	1	0	Inf	Inf	0.333334	photosystem
GO:0019048	12	0	Inf	Inf	1.88203e-06	modulation by virus of host process
GO:0019073	10	0	Inf	Inf	1.69373e-05	viral DNA genome packaging
GO:0016168	1	0	Inf	Inf	0.333334	chlorophyll binding
GO:0046718	11	0	Inf	Inf	5.64593e-06	viral entry into host cell
GO:0018024	1	0	Inf	Inf	0.333334	histone-lysine N-methyltransferase activity
GO:0048027	1	0	Inf	Inf	0.333334	mRNA 5'-UTR binding
GO:0050765	1	0	Inf	Inf	0.333334	negative regulation of phagocytosis
GO:0042651	1	0	Inf	Inf	0.333334	thylakoid membrane
GO:0007264	2	0	Inf	Inf	0.111112	small GTPase mediated signal transduction
GO:0048511	1	0	Inf	Inf	0.333334	rhythmic process
GO:0046797	10	0	Inf	Inf	1.69373e-05	viral procapsid maturation
GO:0010207	1	0	Inf	Inf	0.333334	photosystem II assembly
GO:0009538	1	0	Inf	Inf	0.333334	photosystem I reaction center
GO:1902209	1	0	Inf	Inf	0.333334	negative regulation of bacterial-type flagellum assembly
GO:0018575	2	0	Inf	Inf	0.111112	chlorocatechol 1,2-dioxygenase activity
GO:0005985	2	0	Inf	Inf	0.111112	sucrose metabolic process
GO:0031342	34	2	33.9999	25.2851	1.72992e-14	negative regulation of cell killing
GO:0018836	17	1	33.9999	28.672	9.55368e-08	alkylmercury lyase activity
GO:0046413	17	1	33.9999	28.672	9.55368e-08	organomercury catabolic process
GO:0015694	1534	99	30.9899	5.70887	0	mercury ion transport
GO:0015097	1534	99	30.9899	5.70887	0	mercury ion transmembrane transporter activity
GO:0046689	1260	86	29.3023	5.75791	0	response to mercury ion
GO:0008907	591	47	25.149	6.47507	3.89812e-219	integrase activity
GO:0045340	1362	109	24.9909	4.45463	0	mercury ion binding
GO:0050787	455	37	24.5947	7.01767	2.36214e-168	detoxification of mercury ion
GO:0016152	455	37	24.5947	7.01767	2.36214e-168	mercury (II) reductase activity
GO:0019748	250	22	22.7274	8.04681	1.06149e-91	secondary metabolic process
GO:0000150	2704	289	18.7132	2.14068	0	recombinase activity
GO:0006270	920	115	16.0007	2.83427	4.06676e-304	DNA replication initiation
GO:0030255	264	37	14.2713	4.18333	1.42415e-85	protein secretion by the type IV secretion system
GO:0015074	11321	1688	13.4151	0.672259	0	DNA integration
GO:0000746	139	23	12.0887	4.35095	2.34424e-43	conjugation
GO:0004803	9225	1555	11.8671	0.62978	0	transposase activity
GO:0006313	9327	1609	11.5958	0.600359	0	transposition, DNA-mediated
GO:1901998	10	2	10.0017	7.87072	0.000543864	toxin transport
GO:0033104	10	2	10.0017	7.87072	0.000543864	type VI protein secretion system complex
GO:0015103	223	46	9.69668	2.66436	6.66314e-63	inorganic anion transmembrane transporter activity
GO:0008811	77	17	9.05879	3.75209	4.40212e-22	chloramphenicol O-acetyltransferase activity
GO:0003916	1792	453	7.91166	0.779262	0	DNA topoisomerase activity
GO:0006878	157	40	7.84996	2.33309	1.36815e-40	cellular copper ion homeostasis
GO:0009291	196	51	7.68623	2.06373	1.00773e-49	unidirectional conjugation
GO:0051495	77	21	7.33328	2.8555	5.39998e-20	positive regulation of cytoskeleton organization
GO:0015813	240	70	6.85708	1.62386	7.98924e-57	L-glutamate transmembrane transport
GO:0015501	240	70	6.85708	1.62386	7.98924e-57	glutamate:sodium symporter activity
GO:0071722	17	5	6.79994	4.39185	3.1015e-05	detoxification of arsenic-containing substance
GO:0015446	17	5	6.79994	4.39185	3.1015e-05	ATPase-coupled arsenite transmembrane transporter activity
GO:0110001	84	27	6.22215	2.23117	1.1382e-19	toxin-antitoxin complex
GO:0045893	496	164	6.0487	0.988722	8.09634e-107	positive regulation of transcription, DNA-templated
GO:0030089	6	2	5.99992	4.92703	0.0196624	phycobilisome
GO:0001558	77	26	5.92299	2.16926	1.05389e-17	regulation of cell growth
GO:0097351	77	26	5.92299	2.16926	1.05389e-17	toxin-antitoxin pair type II binding
GO:0006310	5898	2018	5.84529	0.290122	0	DNA recombination
GO:0015297	223	78	5.71785	1.31852	3.5406e-47	antiporter activity
GO:0030001	1875	667	5.62209	0.478722	0	metal ion transport
GO:0015979	8	3	5.33322	4.05317	0.00882372	photosynthesis
GO:0046688	146	55	5.30898	1.44059	6.67105e-30	response to copper ion
GO:0006397	29	11	5.27261	2.71549	5.64806e-07	mRNA processing
GO:0045892	1025	443	4.62738	0.492274	1.69335e-178	negative regulation of transcription, DNA-templated
GO:0016763	30	13	4.61522	2.27931	1.74984e-06	transferase activity, transferring pentosyl groups
GO:0046872	2552	1222	4.17673	0.277404	0	metal ion binding
GO:0005507	616	304	4.0526	0.526237	6.566e-96	copper ion binding
GO:0009523	2	1	3.99999	3.79176	0.259261	photosystem II
GO:0005085	2	1	3.99999	3.79176	0.259261	guanyl-nucleotide exchange factor activity
GO:0045227	4	2	3.99999	3.42671	0.100139	capsule polysaccharide biosynthetic process
GO:0006862	6	3	3.99998	3.14572	0.0684342	nucleotide transport
GO:0005471	6	3	3.99998	3.14572	0.0684342	ATP:ADP antiporter activity
GO:0003924	1624	822	3.95133	0.320541	5.55461e-243	GTPase activity
GO:0006885	120	61	3.93441	1.06698	2.62219e-19	regulation of pH
GO:0006468	300	154	3.89606	0.698464	8.50889e-46	protein phosphorylation
GO:0009636	37	20	3.6997	1.60702	1.46267e-06	response to toxic substance
GO:0003677	22407	12357	3.6265	0.0805952	0	DNA binding
GO:0046353	18	10	3.60024	2.02475	0.000960691	aminoglycoside 3-N-acetyltransferase activity
GO:0009847	66	37	3.5677	1.21725	3.10248e-10	spore germination
GO:0042597	774	459	3.37254	0.371946	1.80266e-98	periplasmic space
GO:0006265	907	572	3.17132	0.318706	8.63341e-107	DNA topological change
GO:0005525	2456	1582	3.10493	0.191734	4.69057e-277	GTP binding
GO:0008703	156	104	3	0.674293	1.63151e-18	5-amino-6-(5-phosphoribosylamino)uracil reductase activity
GO:0009231	156	104	3	0.674293	1.63151e-18	riboflavin biosynthetic process
GO:0046685	25	17	2.94117	1.41492	0.000792929	response to arsenic-containing substance
GO:0009036	10	7	2.85714	1.87543	0.0369267	type II site-specific deoxyribonuclease activity
GO:0015643	34	24	2.83333	1.20186	0.000117737	toxic substance binding
GO:0046677	28	20	2.8	1.27815	0.000569619	response to antibiotic
GO:0006352	1250	972	2.57202	0.208926	4.08901e-108	DNA-templated transcription, initiation
GO:0016779	686	543	2.52671	0.27256	1.93815e-58	nucleotidyltransferase activity
GO:0045454	965	764	2.52619	0.231383	2.07432e-81	cell redox homeostasis
GO:0030416	5	4	2.50001	1.96192	0.170859	methylamine metabolic process
GO:0016987	986	796	2.4774	0.223391	2.14651e-80	sigma factor activity
GO:0015703	112	91	2.46155	0.611609	1.97021e-10	chromate transport
GO:0015109	112	91	2.46155	0.611609	1.97021e-10	chromate transmembrane transporter activity
GO:0006812	934	777	2.40414	0.220948	2.17721e-72	cation transport
GO:0006276	10	9	2.22225	1.41074	0.0887867	plasmid maintenance
GO:0008324	790	721	2.19144	0.2132	1.29121e-51	cation transmembrane transporter activity
GO:0050661	493	486	2.02886	0.242766	7.36613e-28	NADP binding
GO:0006306	232	229	2.02626	0.345609	6.72021e-14	DNA methylation
GO:0008170	232	229	2.02626	0.345609	6.72021e-14	N-methyltransferase activity
GO:0004197	1	1	2.00006	1.97458	1	cysteine-type endopeptidase activity
GO:0015772	1	1	2.00006	1.97458	1	oligosaccharide transport
GO:0036459	1	1	2.00006	1.97458	1	Nan
GO:0019898	1	1	2.00006	1.97458	1	extrinsic component of membrane
GO:0016579	1	1	2.00006	1.97458	1	protein deubiquitination
GO:0030245	1	1	2.00006	1.97458	1	cellulose catabolic process
GO:0009654	1	1	2.00006	1.97458	1	photosystem II oxygen evolving complex
GO:0019684	1	1	2.00006	1.97458	1	photosynthesis, light reaction
GO:0055070	2	2	2.00006	1.8551	0.604938	copper ion homeostasis
GO:0045735	4	4	2.00006	1.62755	0.45374	nutrient reservoir activity
GO:0008080	1577	1594	1.97873	0.134546	2.40943e-80	N-acetyltransferase activity
GO:0015036	17	19	1.78954	0.915783	0.109736	disulfide oxidoreductase activity
GO:0015485	8	9	1.77784	1.18103	0.302276	cholesterol binding
GO:0009678	11	13	1.69235	1.00589	0.19941	pyrophosphate hydrolysis-driven proton transmembrane transporter activity
GO:0004427	11	13	1.69235	1.00589	0.19941	inorganic diphosphatase activity
GO:0005524	12630	15023	1.68147	0.0402535	0	ATP binding
GO:0005727	8	10	1.60004	1.0513	0.324923	extrachromosomal circular DNA
GO:0015416	25	32	1.56254	0.674823	0.0936899	ATPase-coupled organic phosphonate transmembrane transporter activity
GO:0003896	82	112	1.46433	0.37674	0.00952362	DNA primase activity
GO:0009247	5	7	1.42862	1.0711	0.549601	glycolipid biosynthetic process
GO:0015562	550	773	1.42307	0.149877	4.61671e-10	efflux transmembrane transporter activity
GO:0070009	12	18	1.33328	0.747448	0.442913	serine-type aminopeptidase activity
GO:0043856	8	12	1.33328	0.86052	0.635739	anti-sigma factor antagonist activity
GO:0043684	2	3	1.33328	1.22189	1	type IV secretion system complex
GO:0044097	2	3	1.33328	1.22189	1	secretion by the type IV secretion system
GO:0050920	21	32	1.31245	0.593139	0.381826	regulation of chemotaxis
GO:0015700	32	49	1.30608	0.496549	0.240281	arsenite transport
GO:0015105	32	49	1.30608	0.496549	0.240281	arsenite transmembrane transporter activity
GO:0016758	11	17	1.29408	0.74617	0.548864	transferase activity, transferring hexosyl groups
GO:0015299	186	299	1.24412	0.213749	0.0206968	solute:proton antiporter activity
GO:0004601	71	116	1.22411	0.326173	0.187366	peroxidase activity
GO:0030436	6	10	1.19998	0.841541	0.792185	asexual sporulation
GO:0070069	63	113	1.11504	0.309101	0.522405	cytochrome complex
GO:0016773	285	522	1.09195	0.150178	0.23214	phosphotransferase activity, alcohol group as acceptor
GO:0006099	19	35	1.08571	0.499003	0.774001	tricarboxylic acid cycle
GO:0009279	312	610	1.02297	0.133416	0.753129	cell outer membrane
GO:0043461	1	2	1	0.983045	1	proton-transporting ATP synthase complex assembly
GO:0050829	1	2	1	0.983045	1	defense response to Gram-negative bacterium
GO:0006470	1	2	1	0.983045	1	protein dephosphorylation
GO:0009976	1	2	1	0.983045	1	tocopherol cyclase activity
GO:0017003	15	31	0.967766	0.482305	1	protein-heme linkage
GO:0050660	590	1222	0.965649	0.0919607	0.500643	flavin adenine dinucleotide binding
GO:0006304	90	190	0.947369	0.218532	0.703931	DNA modification
GO:0015716	50	107	0.934581	0.280366	0.735331	organic phosphonate transport
GO:0015604	25	54	0.925928	0.373827	0.812019	organic phosphonate transmembrane transporter activity
GO:0019646	66	143	0.923079	0.244305	0.608449	aerobic electron transport chain
GO:0006260	479	1066	0.898691	0.0936207	0.0550994	DNA replication
GO:0003700	3724	8521	0.874083	0.0334595	7.3719e-12	DNA-binding transcription factor activity
GO:0017004	153	353	0.866864	0.154601	0.143844	cytochrome complex assembly
GO:0000104	19	44	0.863645	0.387459	0.688893	succinate dehydrogenase activity
GO:0015159	22	51	0.862754	0.364541	0.620688	polysaccharide transmembrane transporter activity
GO:0015344	125	290	0.862078	0.168794	0.17572	siderophore uptake transmembrane transporter activity
GO:0038023	125	290	0.862078	0.168794	0.17572	signaling receptor activity
GO:0015891	125	290	0.862078	0.168794	0.17572	siderophore transport
GO:0010038	6	14	0.857153	0.587202	1	response to metal ion
GO:0005384	14	33	0.848496	0.428986	0.646472	manganese ion transmembrane transporter activity
GO:0030026	14	33	0.848496	0.428986	0.646472	cellular manganese ion homeostasis
GO:0016994	14	33	0.848496	0.428986	0.646472	precorrin-6A reductase activity
GO:0006355	5746	13633	0.842969	0.0260031	1.84719e-27	regulation of transcription, DNA-templated
GO:0000166	777	1845	0.842289	0.0688008	5.64133e-05	nucleotide binding
GO:0009378	87	213	0.816921	0.187853	0.125504	four-way junction helicase activity
GO:0030145	24	59	0.813579	0.329604	0.417693	manganese ion binding
GO:0004115	4	10	0.800024	0.616874	1	3',5'-cyclic-AMP phosphodiesterase activity
GO:0006198	4	10	0.800024	0.616874	1	cAMP catabolic process
GO:0008641	66	166	0.795206	0.206682	0.125348	ubiquitin-like modifier activating enzyme activity
GO:0015990	13	33	0.787907	0.407341	0.533644	electron transport coupled proton transport
GO:0004673	118	301	0.784082	0.15585	0.0257321	protein histidine kinase activity
GO:0004540	94	240	0.783363	0.172986	0.0482327	ribonuclease activity
GO:0006814	167	432	0.77312	0.130382	0.00478515	sodium ion transport
GO:0006879	74	192	0.770806	0.189485	0.0591912	cellular iron ion homeostasis
GO:0016491	2302	6058	0.759967	0.0360528	6.30241e-30	oxidoreductase activity
GO:0008199	87	232	0.749981	0.170679	0.0238181	ferric iron binding
GO:0042173	3	8	0.749981	0.621813	1	regulation of sporulation resulting in formation of a cellular spore
GO:0020037	186	497	0.748473	0.119539	0.000640048	heme binding
GO:0016021	4524	12105	0.747448	0.0254746	5.57486e-64	integral component of membrane
GO:0005887	1362	3647	0.7469	0.0456838	9.93673e-21	integral component of plasma membrane
GO:0016993	11	30	0.733322	0.401766	0.412821	precorrin-8X methylmutase activity
GO:0042626	368	1020	0.721563	0.0828977	4.26266e-08	ATPase-coupled transmembrane transporter activity
GO:0055085	5073	14190	0.715011	0.0229253	6.18703e-96	transmembrane transport
GO:0016310	109	306	0.712416	0.14527	0.00209061	phosphorylation
GO:0009403	21	59	0.711863	0.301044	0.19352	toxin biosynthetic process
GO:0018850	6	17	0.705883	0.478031	0.516455	chloromuconate cycloisomerase activity
GO:0018849	6	17	0.705883	0.478031	0.516455	muconate cycloisomerase activity
GO:0016832	54	159	0.679246	0.189975	0.0133455	aldehyde-lyase activity
GO:0055114	3411	10070	0.677458	0.0261681	8.55715e-90	oxidation-reduction process
GO:0008827	29	87	0.666667	0.244596	0.0611672	cytochrome o ubiquinol oxidase activity
GO:0006631	6	18	0.666667	0.45005	0.517011	fatty acid metabolic process
GO:0000272	4	12	0.666667	0.509959	0.601689	polysaccharide catabolic process
GO:0016651	1	3	0.666667	0.653963	1	oxidoreductase activity, acting on NAD(P)H
GO:0051606	1	3	0.666667	0.653963	1	detection of stimulus
GO:0046873	60	185	0.648649	0.172241	0.00346641	metal ion transmembrane transporter activity
GO:0008168	411	1285	0.639689	0.0687205	3.67774e-16	methyltransferase activity
GO:0043565	704	2210	0.637105	0.052704	4.90185e-27	sequence-specific DNA binding
GO:0016301	70	220	0.636364	0.157238	0.000746731	kinase activity
GO:0006413	35	110	0.636364	0.214337	0.0216043	translational initiation
GO:0003743	35	110	0.636364	0.214337	0.0216043	translation initiation factor activity
GO:0004672	54	175	0.617143	0.171028	0.00155572	protein kinase activity
GO:0009347	4	13	0.615385	0.469221	0.453251	aspartate carbamoyltransferase complex
GO:0006207	4	13	0.615385	0.469221	0.453251	'de novo' pyrimidine nucleobase biosynthetic process
GO:0018576	7	23	0.608696	0.388123	0.332785	catechol 1,2-dioxygenase activity
GO:0009712	7	23	0.608696	0.388123	0.332785	catechol-containing compound metabolic process
GO:0004185	20	66	0.606061	0.258066	0.0515353	serine-type carboxypeptidase activity
GO:0016020	4842	15996	0.605402	0.0194743	5.01909e-218	membrane
GO:0015774	22	74	0.594595	0.24295	0.0303532	polysaccharide transport
GO:0000155	546	1855	0.58868	0.0546205	7.42937e-30	phosphorelay sensor kinase activity
GO:0005992	7	24	0.583334	0.3711	0.254311	trehalose biosynthetic process
GO:0032775	33	116	0.568966	0.194749	0.00395766	DNA methylation on adenine
GO:0000160	1027	3623	0.566934	0.0385374	2.28685e-63	phosphorelay signal transduction system
GO:0007165	679	2398	0.566306	0.0470793	1.03026e-42	signal transduction
GO:0015035	56	201	0.557214	0.150496	6.55539e-05	protein disulfide oxidoreductase activity
GO:0009307	22	79	0.556963	0.226464	0.0147663	DNA restriction-modification system
GO:0008771	5	18	0.555556	0.394323	0.276357	[citrate (pro-3S)-lyase] ligase activity
GO:0003729	5	18	0.555556	0.394323	0.276357	mRNA binding
GO:0022857	1693	6146	0.550928	0.0292518	9.11288e-115	transmembrane transporter activity
GO:0043683	3	11	0.545455	0.44775	0.410653	type IV pilus biogenesis
GO:0008643	42	155	0.541936	0.166128	0.000265725	carbohydrate transport
GO:0018580	34	126	0.539683	0.181557	0.00101085	nitronate monooxygenase activity
GO:0016616	112	422	0.530806	0.103766	4.38226e-10	oxidoreductase activity, acting on the CH-OH group of donors, NAD or NADP as acceptor
GO:0008237	51	198	0.515152	0.144202	1.08224e-05	metallopeptidase activity
GO:0005351	36	140	0.514286	0.168078	0.000214831	carbohydrate:proton symporter activity
GO:0003690	10	39	0.512821	0.284536	0.067822	double-stranded DNA binding
GO:0009007	34	135	0.503704	0.16852	0.000217153	site-specific DNA-methyltransferase (adenine-specific) activity
GO:0015116	34	136	0.500001	0.167239	0.000164453	sulfate transmembrane transporter activity
GO:0008239	13	52	0.500001	0.250247	0.0246202	dipeptidyl-peptidase activity
GO:0008146	2	8	0.500001	0.448273	0.512267	sulfotransferase activity
GO:0009404	1	4	0.500001	0.489844	1	toxin metabolic process
GO:0009394	1	4	0.500001	0.489844	1	2'-deoxyribonucleotide metabolic process
GO:0015886	43	174	0.494253	0.14884	1.3543e-05	heme transport
GO:0006813	135	547	0.493602	0.0878322	5.33079e-15	potassium ion transport
GO:0008097	12	49	0.489797	0.252678	0.0287612	5S rRNA binding
GO:0000271	19	78	0.48718	0.208642	0.00348381	polysaccharide biosynthetic process
GO:0004520	26	107	0.485982	0.18221	0.000607927	endodeoxyribonuclease activity
GO:0004526	7	29	0.482759	0.304251	0.079707	ribonuclease P activity
GO:0009116	151	628	0.480892	0.080995	6.37363e-18	nucleoside metabolic process
GO:0005509	18	75	0.480001	0.210029	0.00398851	calcium ion binding
GO:0006629	110	460	0.478262	0.09345	1.39123e-13	lipid metabolic process
GO:0009380	46	193	0.476685	0.138886	1.81298e-06	excinuclease repair complex
GO:0016887	1507	6336	0.475695	0.0263672	1.11593e-168	ATPase activity
GO:0006289	46	194	0.474227	0.138107	1.36947e-06	nucleotide-excision repair
GO:0050151	4	17	0.470589	0.355392	0.24593	oleate hydratase activity
GO:0004222	155	663	0.467572	0.0775983	6.58114e-20	metalloendopeptidase activity
GO:0046912	35	150	0.466667	0.153343	1.57939e-05	transferase activity, transferring acyl groups, acyl groups converted into alkyl on transfer
GO:0001216	14	60	0.466667	0.225859	0.00908681	DNA-binding transcription activator activity
GO:1990397	9	39	0.461539	0.264952	0.032098	queuosine salvage
GO:0008171	20	87	0.459771	0.192003	0.000965878	O-methyltransferase activity
GO:0016903	19	83	0.457832	0.195304	0.0014845	oxidoreductase activity, acting on the aldehyde or oxo group of donors
GO:0004177	26	114	0.456141	0.170307	0.000145981	aminopeptidase activity
GO:1902208	5	22	0.454546	0.320076	0.150961	regulation of bacterial-type flagellum assembly
GO:0009190	7	31	0.451614	0.283766	0.0578622	cyclic nucleotide biosynthetic process
GO:0016849	7	31	0.451614	0.283766	0.0578622	phosphorus-oxygen lyase activity
GO:0016772	81	362	0.447514	0.10027	2.136e-12	transferase activity, transferring phosphorus-containing groups
GO:0008134	126	566	0.44523	0.0811446	9.22383e-19	transcription factor binding
GO:0006807	107	481	0.444907	0.087522	3.0032e-16	nitrogen compound metabolic process
GO:0007059	14	64	0.437501	0.210953	0.00365354	chromosome segregation
GO:0003911	27	124	0.435485	0.159499	2.92933e-05	DNA ligase (NAD+) activity
GO:0006979	26	120	0.433334	0.161257	4.50954e-05	response to oxidative stress
GO:0009055	229	1063	0.430857	0.0590021	4.49201e-36	electron transfer activity
GO:0015232	30	140	0.428572	0.149768	6.3106e-06	heme transmembrane transporter activity
GO:0046854	34	159	0.427674	0.141436	1.70699e-06	phosphatidylinositol phosphorylation
GO:0016051	10	47	0.425533	0.233825	0.0109568	carbohydrate biosynthetic process
GO:0050568	4	19	0.421053	0.31689	0.123836	protein-glutamine glutaminase activity
GO:0009360	44	210	0.419048	0.123432	1.57036e-08	DNA polymerase III complex
GO:0003824	1423	6823	0.417119	0.0235109	2.25728e-233	catalytic activity
GO:0009425	17	82	0.414635	0.184156	0.000399392	bacterial-type flagellum basal body
GO:0016831	27	132	0.409092	0.149241	4.61e-06	carboxy-lyase activity
GO:0045226	13	64	0.406251	0.201001	0.00157229	extracellular polysaccharide biosynthetic process
GO:0005840	343	1699	0.403768	0.0453339	3.33834e-63	ribosome
GO:0008299	33	164	0.40244	0.134326	2.10816e-07	isoprenoid biosynthetic process
GO:0051287	183	911	0.401757	0.0608959	7.0932e-35	NAD binding
GO:0003724	11	55	0.400001	0.211216	0.00372171	RNA helicase activity
GO:0004725	1	5	0.400001	0.391539	0.670781	protein tyrosine phosphatase activity
GO:0009288	37	186	0.397851	0.126179	3.04966e-08	bacterial-type flagellum
GO:0000902	26	131	0.396948	0.14692	3.70079e-06	cell morphogenesis
GO:0008236	73	369	0.395665	0.0922213	2.3583e-15	serine-type peptidase activity
GO:0031554	12	61	0.393444	0.200619	0.00173087	regulation of DNA-templated transcription, termination
GO:0019752	12	61	0.393444	0.200619	0.00173087	carboxylic acid metabolic process
GO:1902600	27	138	0.391305	0.142369	1.27241e-06	proton transmembrane transport
GO:0015093	9	46	0.391305	0.222921	0.00633258	ferrous iron transmembrane transporter activity
GO:0003899	86	441	0.390024	0.0841483	1.97956e-18	DNA-directed 5'-3' RNA polymerase activity
GO:0006412	372	1909	0.389734	0.0419657	7.3138e-75	translation
GO:0003735	370	1909	0.387639	0.0418333	2.44012e-75	structural constituent of ribosome
GO:0005515	401	2071	0.387254	0.0402028	8.9898e-82	protein binding
GO:0016829	90	465	0.387098	0.0817252	1.56778e-19	lyase activity
GO:0035596	24	124	0.387098	0.148103	4.39536e-06	methylthiotransferase activity
GO:0051536	279	1443	0.386696	0.0477736	1.12438e-57	iron-sulfur cluster binding
GO:0006508	472	2453	0.384836	0.0368605	2.06827e-97	proteolysis
GO:0030261	15	78	0.384616	0.179118	0.000250619	chromosome condensation
GO:0051537	74	388	0.381444	0.0880995	6.44608e-17	2 iron, 2 sulfur cluster binding
GO:0006274	4	21	0.380953	0.285899	0.0877098	DNA replication termination
GO:0015079	14	74	0.378379	0.181053	0.000386464	potassium ion transmembrane transporter activity
GO:0004252	116	614	0.377851	0.0707304	3.05004e-26	serine-type endopeptidase activity
GO:0006351	85	451	0.376941	0.0815812	8.44692e-20	transcription, DNA-templated
GO:0004650	3	16	0.375001	0.304984	0.143421	polygalacturonase activity
GO:0002161	14	75	0.373334	0.178518	0.000272285	aminoacyl-tRNA editing activity
GO:0006298	50	268	0.373135	0.102973	1.72816e-12	mismatch repair
GO:0003887	96	517	0.371374	0.0758697	5.76834e-23	DNA-directed DNA polymerase activity
GO:0015293	38	205	0.370733	0.115675	8.04693e-10	symporter activity
GO:0006418	218	1179	0.369806	0.0512609	1.2788e-50	tRNA aminoacylation for protein translation
GO:0016788	67	363	0.369147	0.0890717	1.05116e-16	hydrolase activity, acting on ester bonds
GO:0016747	140	763	0.366973	0.0627704	1.29841e-33	transferase activity, transferring acyl groups other than amino-acyl groups
GO:0004812	267	1462	0.365254	0.0459086	1.57864e-63	aminoacyl-tRNA ligase activity
GO:0008270	192	1054	0.364327	0.053573	2.46651e-46	zinc ion binding
GO:0046914	22	121	0.363637	0.143886	1.87467e-06	transition metal ion binding
GO:0003885	2	11	0.363637	0.324471	0.242268	D-arabinono-1,4-lactone oxidase activity
GO:0016620	33	182	0.362638	0.12032	4.25721e-09	oxidoreductase activity, acting on the aldehyde or oxo group of donors, NAD or NADP as acceptor
GO:0051499	14	78	0.358975	0.171381	0.00013846	D-aminoacyl-tRNA deacylase activity
GO:0008198	14	78	0.358975	0.171381	0.00013846	ferrous iron binding
GO:0033177	15	84	0.357144	0.165742	6.44352e-05	proton-transporting two-sector ATPase complex, proton-transporting domain
GO:0030983	43	241	0.356847	0.105129	5.2296e-12	mismatched DNA binding
GO:0030976	90	506	0.355732	0.0746894	8.01149e-24	thiamine pyrophosphate binding
GO:0016627	156	890	0.350563	0.0567921	1.45283e-41	oxidoreductase activity, acting on the CH-CH group of donors
GO:0008808	14	80	0.350001	0.166898	6.87661e-05	cardiolipin synthase activity
GO:0032049	14	80	0.350001	0.166898	6.87661e-05	cardiolipin biosynthetic process
GO:0008658	80	459	0.348585	0.0772124	2.81969e-22	penicillin binding
GO:0009236	59	341	0.346042	0.088164	4.23249e-17	cobalamin biosynthetic process
GO:0016655	37	214	0.345795	0.108769	2.83506e-11	oxidoreductase activity, acting on NAD(P)H, quinone or similar compound as acceptor
GO:0006725	43	249	0.345382	0.101572	6.75734e-13	cellular aromatic compound metabolic process
GO:0016805	11	64	0.343751	0.18031	0.000335963	dipeptidase activity
GO:0009306	140	816	0.343138	0.0584329	2.52206e-39	protein secretion
GO:0009294	12	70	0.342858	0.173738	0.000228105	DNA mediated transformation
GO:0016765	67	392	0.341838	0.0820698	1.25554e-19	transferase activity, transferring alkyl or aryl (other than methyl) groups
GO:0018193	7	41	0.341464	0.212211	0.00530169	peptidyl-amino acid modification
GO:0097428	8	47	0.340426	0.201499	0.00239848	protein maturation by iron-sulfur cluster transfer
GO:0005198	41	246	0.333334	0.0999452	2.59636e-13	structural molecule activity
GO:0009267	9	54	0.333334	0.188658	0.00113195	cellular response to starvation
GO:0030435	4	24	0.333334	0.249248	0.0426636	sporulation resulting in formation of a cellular spore
GO:0009372	3	18	0.333334	0.270435	0.0673547	quorum sensing
GO:0016714	2	12	0.333334	0.2971	0.162948	oxidoreductase activity, acting on paired donors, with incorporation or reduction of molecular oxygen, reduced pteridine as one donor, and incorporation of one atom of oxygen
GO:0006694	2	12	0.333334	0.2971	0.162948	steroid biosynthetic process
GO:0003854	2	12	0.333334	0.2971	0.162948	3-beta-hydroxy-delta5-steroid dehydrogenase activity
GO:0016787	725	4359	0.332646	0.0256318	5.37162e-210	hydrolase activity
GO:0004190	10	61	0.32787	0.17814	0.000352415	aspartic-type endopeptidase activity
GO:0016743	35	214	0.327104	0.105123	5.30302e-12	carboxyl- or carbamoyltransferase activity
GO:0010181	127	784	0.32398	0.0575554	1.72139e-40	FMN binding
GO:0004519	63	390	0.323078	0.0795365	6.01116e-21	endonuclease activity
GO:0004721	5	31	0.322581	0.224657	0.0125589	phosphoprotein phosphatase activity
GO:0003676	346	2157	0.320817	0.03527	7.87655e-110	nucleic acid binding
GO:0017013	12	75	0.320001	0.161685	5.28244e-05	protein flavinylation
GO:0008408	66	413	0.319613	0.0769634	2.30436e-22	3'-5' exonuclease activity
GO:0035556	7	44	0.318183	0.197267	0.00257133	intracellular signal transduction
GO:0042910	20	126	0.317461	0.12994	8.71272e-08	xenobiotic transmembrane transporter activity
GO:1990961	20	126	0.317461	0.12994	8.71272e-08	xenobiotic detoxification by transmembrane export across the plasma membrane
GO:0008410	37	234	0.31624	0.0989863	2.01036e-13	CoA-transferase activity
GO:0006457	90	572	0.314686	0.06559	4.42787e-31	protein folding
GO:0071805	14	89	0.314607	0.149269	8.03395e-06	potassium ion transmembrane transport
GO:0030246	19	121	0.31405	0.131298	1.28398e-07	carbohydrate binding
GO:0043039	53	339	0.312685	0.0831684	3.69913e-19	tRNA aminoacylation
GO:0030153	4	26	0.307693	0.229641	0.0194512	bacteriocin immunity
GO:0016702	2	13	0.307693	0.273989	0.167584	oxidoreductase activity, acting on single donors with incorporation of molecular oxygen, incorporation of two atoms of oxygen
GO:0042908	12	79	0.303798	0.153204	1.74107e-05	xenobiotic transport
GO:0004181	11	73	0.301371	0.157206	3.75906e-05	metallocarboxypeptidase activity
GO:0015930	17	113	0.300886	0.131546	1.90056e-07	glutamate synthase activity
GO:0032328	23	153	0.300654	0.115644	1.03108e-09	alanine transport
GO:0015655	23	153	0.300654	0.115644	1.03108e-09	alanine:sodium symporter activity
GO:0043190	201	1338	0.300449	0.0427374	3.00504e-74	ATP-binding cassette (ABC) transporter complex
GO:0009002	24	160	0.300001	0.113284	4.9978e-10	serine-type D-Ala-D-Ala carboxypeptidase activity
GO:0044238	12	80	0.300001	0.151194	1.19992e-05	primary metabolic process
GO:0048037	23	154	0.298702	0.11486	1.07234e-09	obsolete cofactor binding
GO:0004553	125	840	0.29762	0.0529738	1.08675e-47	hydrolase activity, hydrolyzing O-glycosyl compounds
GO:0035444	8	54	0.296298	0.174531	0.000374833	nickel cation transmembrane transport
GO:0003774	25	169	0.29586	0.109697	1.13488e-10	motor activity
GO:0005975	332	2253	0.294719	0.0328907	2.78591e-126	carbohydrate metabolic process
GO:0008745	22	150	0.293336	0.114877	1.03578e-09	N-acetylmuramoyl-L-alanine amidase activity
GO:0008483	66	450	0.293336	0.0702989	1.25052e-26	transaminase activity
GO:0009253	36	246	0.292686	0.0923943	3.65986e-15	peptidoglycan catabolic process
GO:0015031	72	493	0.292093	0.0672444	3.57479e-29	protein transport
GO:0003796	14	96	0.29167	0.137971	1.26213e-06	lysozyme activity
GO:0016998	14	96	0.29167	0.137971	1.26213e-06	cell wall macromolecule catabolic process
GO:0016597	24	165	0.290913	0.109705	1.1065e-10	amino acid binding
GO:0006281	189	1301	0.290549	0.0424847	6.13838e-75	DNA repair
GO:0009058	354	2468	0.286876	0.0310178	3.02938e-142	biosynthetic process
GO:0006450	6	42	0.285721	0.186471	0.00183241	regulation of translational fidelity
GO:0004559	6	42	0.285721	0.186471	0.00183241	alpha-mannosidase activity
GO:0006013	6	42	0.285721	0.186471	0.00183241	mannose metabolic process
GO:0030170	251	1775	0.282824	0.0360089	1.73561e-104	pyridoxal phosphate binding
GO:0008484	63	447	0.281888	0.068903	1.25727e-27	sulfuric ester hydrolase activity
GO:0071949	45	322	0.279513	0.0796402	1.80368e-20	FAD binding
GO:0004040	16	115	0.278271	0.124367	4.16807e-08	amidase activity
GO:0006520	35	252	0.277788	0.0885673	2.5728e-16	cellular amino acid metabolic process
GO:0017150	23	166	0.277119	0.106204	3.54488e-11	tRNA dihydrouridine synthase activity
GO:0015727	9	65	0.276934	0.1557	5.68664e-05	lactate transport
GO:0015129	9	65	0.276934	0.1557	5.68664e-05	lactate transmembrane transporter activity
GO:0008272	37	268	0.276131	0.0858614	1.89323e-17	sulfate transport
GO:0003910	4	29	0.275874	0.205386	0.00884769	DNA ligase (ATP) activity
GO:0008882	8	58	0.275874	0.162132	0.000117722	[glutamate-ammonia-ligase] adenylyltransferase activity
GO:0015099	8	58	0.275874	0.162132	0.000117722	nickel cation transmembrane transporter activity
GO:0015288	53	389	0.272506	0.0719763	5.6357e-25	porin activity
GO:0051082	57	421	0.270798	0.0691857	4.64032e-27	unfolded protein binding
GO:0008556	33	244	0.270506	0.0884196	3.6402e-16	potassium transmembrane transporter activity, phosphorylative mechanism
GO:0000049	10	74	0.270284	0.145811	1.22661e-05	tRNA binding
GO:0004471	15	111	0.270284	0.123943	4.07306e-08	malate dehydrogenase (decarboxylating) (NAD+) activity
GO:0006364	87	646	0.269364	0.0565558	6.2185e-41	rRNA processing
GO:0008519	14	104	0.269245	0.126971	1.25722e-07	ammonium transmembrane transporter activity
GO:0015696	14	104	0.269245	0.126971	1.25722e-07	ammonium transport
GO:0030234	9	67	0.268672	0.150923	2.51384e-05	enzyme regulator activity
GO:0005506	72	538	0.267673	0.06137	1.38146e-34	iron ion binding
GO:0003918	19	142	0.267621	0.111132	4.50237e-10	DNA topoisomerase type II (double strand cut, ATP-hydrolyzing) activity
GO:0017038	21	157	0.267531	0.106464	4.7852e-11	protein import
GO:0042919	6	45	0.266683	0.1737	0.000555882	benzoate transport
GO:0042925	6	45	0.266683	0.1737	0.000555882	benzoate transmembrane transporter activity
GO:0046983	46	345	0.266682	0.0750667	8.8609e-23	protein dimerization activity
GO:0016780	33	248	0.266145	0.0869397	1.13636e-16	phosphotransferase activity, for other substituted phosphate groups
GO:0032259	14	106	0.264168	0.12451	5.81068e-08	methylation
GO:0005737	226	1725	0.262046	0.0349689	2.18971e-109	cytoplasm
GO:0008852	4	31	0.258084	0.191872	0.00614158	exodeoxyribonuclease I activity
GO:0016810	28	217	0.258084	0.0905307	2.78416e-15	hydrolase activity, acting on carbon-nitrogen (but not peptide) bonds
GO:0010033	5	39	0.256431	0.17757	0.00119512	response to organic substance
GO:0043937	5	39	0.256431	0.17757	0.00119512	regulation of sporulation
GO:0061024	5	39	0.256431	0.17757	0.00119512	membrane organization
GO:0003723	307	2399	0.255959	0.0294254	7.04916e-155	RNA binding
GO:0097347	7	55	0.254567	0.156779	0.000116864	TAM protein secretion complex
GO:0070569	1	8	0.250023	0.244385	0.28791	uridylyltransferase activity
GO:0043231	1	8	0.250023	0.244385	0.28791	intracellular membrane-bounded organelle
GO:0016872	1	8	0.250023	0.244385	0.28791	intramolecular lyase activity
GO:0046026	3	24	0.250023	0.20183	0.0132755	precorrin-4 C11-methyltransferase activity
GO:0042619	4	32	0.250023	0.185821	0.00397483	poly-hydroxybutyrate biosynthetic process
GO:0051304	7	56	0.250023	0.153908	7.68176e-05	chromosome separation
GO:0008830	7	56	0.250023	0.153908	7.68176e-05	dTDP-4-dehydrorhamnose 3,5-epimerase activity
GO:0008233	63	505	0.249528	0.0606467	1.16341e-34	peptidase activity
GO:0005694	36	289	0.249158	0.0780703	1.66031e-20	chromosome
GO:0015078	19	155	0.245186	0.101454	8.92555e-12	proton transmembrane transporter activity
GO:0004866	8	66	0.242451	0.141958	1.07949e-05	endopeptidase inhibitor activity
GO:0050662	72	599	0.240428	0.0548636	3.12169e-42	obsolete coenzyme binding
GO:0009035	3	25	0.240027	0.193642	0.00879653	type I site-specific deoxyribonuclease activity
GO:0016705	48	401	0.239429	0.065828	7.45542e-29	oxidoreductase activity, acting on paired donors, with incorporation or reduction of molecular oxygen
GO:0043043	11	93	0.236588	0.122435	1.04868e-07	peptide biosynthetic process
GO:0008375	2	17	0.235323	0.208975	0.0480897	acetylglucosaminyltransferase activity
GO:0000723	2	17	0.235323	0.208975	0.0480897	telomere maintenance
GO:0019825	4	34	0.235323	0.174695	0.00172888	oxygen binding
GO:0008761	8	68	0.235323	0.137677	7.27983e-06	UDP-N-acetylglucosamine 2-epimerase activity
GO:0000105	17	145	0.234512	0.101567	2.5382e-11	histidine biosynthetic process
GO:0071973	72	615	0.234176	0.0534002	3.91352e-44	bacterial-type flagellum-dependent cell motility
GO:0005615	5	43	0.232588	0.1607	0.000349679	extracellular space
GO:0004521	5	43	0.232588	0.1607	0.000349679	endoribonuclease activity
GO:0019069	9	78	0.230739	0.129006	1.01135e-06	viral capsid assembly
GO:0044237	16	139	0.230186	0.102177	3.37462e-11	cellular metabolic process
GO:0019867	130	1135	0.229045	0.0394955	1.01238e-81	outer membrane
GO:0006529	12	105	0.228542	0.114086	9.99566e-09	asparagine biosynthetic process
GO:0004066	12	105	0.228542	0.114086	9.99566e-09	asparagine synthase (glutamine-hydrolyzing) activity
GO:0042254	9	79	0.227819	0.127329	6.72797e-07	ribosome biogenesis
GO:0016879	9	79	0.227819	0.127329	6.72797e-07	ligase activity, forming carbon-nitrogen bonds
GO:0008654	19	168	0.226162	0.093309	2.32283e-13	phospholipid biosynthetic process
GO:0008855	20	177	0.22596	0.0912096	5.09449e-14	exodeoxyribonuclease VII activity
GO:0008081	21	186	0.225778	0.0892503	1.11871e-14	phosphoric diester hydrolase activity
GO:0015969	19	169	0.224824	0.0927374	1.53713e-13	guanosine tetraphosphate metabolic process
GO:0008428	2	18	0.222195	0.19719	0.0305643	ribonuclease inhibitor activity
GO:0051252	2	18	0.222195	0.19719	0.0305643	regulation of RNA metabolic process
GO:1903401	4	36	0.222195	0.164765	0.0011365	L-lysine transmembrane transport
GO:0070206	4	36	0.222195	0.164765	0.0011365	protein trimerization
GO:0015661	4	36	0.222195	0.164765	0.0011365	L-lysine efflux transmembrane transporter activity
GO:0032955	5	45	0.222195	0.153358	0.000230707	regulation of division septum assembly
GO:0008033	44	400	0.219974	0.0626396	1.28594e-30	tRNA processing
GO:0006414	10	91	0.219754	0.117796	6.26241e-08	translational elongation
GO:0006259	10	91	0.219754	0.117796	6.26241e-08	DNA metabolic process
GO:0032977	7	64	0.218724	0.134162	6.50986e-06	membrane insertase activity
GO:0006605	11	101	0.217796	0.112384	8.94548e-09	protein targeting
GO:0051276	5	46	0.217366	0.149959	0.000150246	chromosome organization
GO:0030694	10	92	0.217366	0.11648	4.16207e-08	bacterial-type flagellum basal body, rod
GO:0006935	54	499	0.216408	0.0560956	2.08352e-38	chemotaxis
GO:0048472	4	37	0.216191	0.160238	0.000738572	threonine-phosphate decarboxylase activity
GO:0034257	6	56	0.214262	0.138825	2.0623e-05	nicotinamide riboside transmembrane transporter activity
GO:0034258	6	56	0.214262	0.138825	2.0623e-05	nicotinamide riboside transport
GO:0015935	29	272	0.213211	0.073059	1.07136e-21	small ribosomal subunit
GO:0008173	42	396	0.212098	0.0616127	2.6889e-31	RNA methyltransferase activity
GO:0016791	10	95	0.210503	0.112714	1.79087e-08	phosphatase activity
GO:0047355	6	58	0.206875	0.13394	1.34428e-05	CDP-glycerol glycerophosphotransferase activity
GO:0019290	6	58	0.206875	0.13394	1.34428e-05	siderophore biosynthetic process
GO:0015658	12	116	0.206875	0.102967	3.63627e-10	branched-chain amino acid transmembrane transporter activity
GO:0015803	12	116	0.206875	0.102967	3.63627e-10	branched-chain amino acid transport
GO:0015221	4	39	0.205107	0.151892	0.000495802	lipopolysaccharide transmembrane transporter activity
GO:0008610	4	39	0.205107	0.151892	0.000495802	lipid biosynthetic process
GO:0009428	5	49	0.204061	0.140608	6.45828e-05	bacterial-type flagellum basal body, distal rod, P ring
GO:0006415	25	245	0.204061	0.0745317	2.31076e-20	translational termination
GO:0016790	7	69	0.202878	0.124225	1.22025e-06	thiolester hydrolase activity
GO:0006808	9	89	0.202227	0.112685	3.60439e-08	regulation of nitrogen utilization
GO:0003725	14	139	0.201419	0.0940936	3.1779e-12	double-stranded RNA binding
GO:0033926	1	10	0.19998	0.195368	0.113774	glycopeptide alpha-N-acetylgalactosaminidase activity
GO:0009271	1	10	0.19998	0.195368	0.113774	phage shock
GO:0016989	4	40	0.19998	0.148037	0.000314878	sigma factor antagonist activity
GO:0008725	6	60	0.19998	0.129387	5.78307e-06	DNA-3-methyladenine glycosylase activity
GO:0015920	7	70	0.19998	0.12241	1.23683e-06	lipopolysaccharide transport
GO:0016407	11	110	0.19998	0.103001	7.36433e-10	acetyltransferase activity
GO:0003678	41	412	0.19901	0.0582827	6.65216e-34	DNA helicase activity
GO:0043953	10	101	0.198001	0.105846	3.39645e-09	protein transport by the Tat complex
GO:0004176	10	102	0.19606	0.104748	2.1679e-09	ATP-dependent peptidase activity
GO:0006282	8	82	0.195104	0.11359	7.24982e-08	regulation of DNA repair
GO:0001530	3	31	0.193531	0.155667	0.00156894	lipopolysaccharide binding
GO:0016746	24	249	0.192754	0.0715359	1.52548e-21	transferase activity, transferring acyl groups
GO:0022900	17	177	0.192073	0.0826332	1.13201e-15	electron transport chain
GO:0030894	2	21	0.190459	0.168807	0.0129411	replisome
GO:0016874	40	435	0.183893	0.0543031	1.08314e-37	ligase activity
GO:0016042	1	11	0.181804	0.177576	0.0727094	lipid catabolic process
GO:0016226	18	199	0.18089	0.0758659	3.4657e-18	iron-sulfur cluster assembly
GO:0009295	8	89	0.179761	0.104463	8.22707e-09	nucleoid
GO:0006139	15	167	0.179627	0.0812847	1.7462e-15	nucleobase-containing compound metabolic process
GO:0006353	13	145	0.179296	0.0860641	1.29978e-13	DNA-templated transcription, termination
GO:0016638	9	101	0.178204	0.0989936	7.47888e-10	oxidoreductase activity, acting on the CH-NH2 group of donors
GO:0006826	13	146	0.178069	0.0854615	8.49131e-14	iron ion transport
GO:0051262	4	45	0.177764	0.131328	5.47173e-05	protein tetramerization
GO:0016853	24	271	0.177108	0.0656081	1.57758e-24	isomerase activity
GO:0009318	14	160	0.174987	0.0814391	5.29348e-15	exodeoxyribonuclease VII complex
GO:0006865	39	447	0.174484	0.052086	7.85858e-40	amino acid transport
GO:0003993	2	23	0.1739	0.154021	0.00515408	acid phosphatase activity
GO:0016798	4	46	0.1739	0.128433	5.80758e-05	hydrolase activity, acting on glycosyl bonds
GO:0015450	19	219	0.173503	0.0709919	2.38893e-20	P-P-bond-hydrolysis-driven protein transmembrane transporter activity
GO:0003755	46	531	0.173245	0.0479422	2.25352e-47	peptidyl-prolyl cis-trans isomerase activity
GO:0009982	49	575	0.170423	0.0458268	9.36018e-52	pseudouridine synthase activity
GO:0034220	17	200	0.169988	0.0729263	7.30373e-19	ion transmembrane transport
GO:0009451	49	577	0.169832	0.045625	6.08861e-52	RNA modification
GO:0001522	49	577	0.169832	0.045625	6.08861e-52	pseudouridine synthesis
GO:0004814	9	106	0.1698	0.0942204	1.30668e-10	arginine-tRNA ligase activity
GO:0006420	9	106	0.1698	0.0942204	1.30668e-10	arginyl-tRNA aminoacylation
GO:0016151	18	213	0.169003	0.0707175	4.42634e-20	nickel cation binding
GO:0006396	54	640	0.168738	0.0433675	8.57292e-58	RNA processing
GO:0030288	43	511	0.168286	0.0479857	2.1855e-46	outer membrane-bounded periplasmic space
GO:0006308	14	167	0.167653	0.0779453	3.73742e-16	DNA catabolic process
GO:2001070	1	12	0.166656	0.162753	0.0731893	starch binding
GO:0046903	1	12	0.166656	0.162753	0.0731893	secretion
GO:0009254	3	36	0.166656	0.133829	0.000265243	peptidoglycan turnover
GO:0051302	4	48	0.166656	0.12301	2.24672e-05	regulation of cell division
GO:0003697	13	159	0.163512	0.0783284	1.68703e-15	single-stranded DNA binding
GO:0009379	6	74	0.162152	0.104489	7.14781e-08	Holliday junction helicase complex
GO:0047661	2	25	0.15999	0.14161	0.00333906	amino-acid racemase activity
GO:0051775	2	25	0.15999	0.14161	0.00333906	response to redox state
GO:0003746	10	126	0.158721	0.0844009	8.37682e-13	translation elongation factor activity
GO:0016740	39	492	0.158527	0.0471742	2.48972e-46	transferase activity
GO:0006006	3	38	0.157886	0.126706	0.000171815	glucose metabolic process
GO:0008772	3	38	0.157886	0.126706	0.000171815	[isocitrate dehydrogenase (NADP+)] kinase activity
GO:0051539	32	406	0.157626	0.0512372	1.2912e-38	4 iron, 4 sulfur cluster binding
GO:0044781	4	51	0.156854	0.115682	9.3172e-06	bacterial-type flagellum organization
GO:0016884	4	51	0.156854	0.115682	9.3172e-06	carbon-nitrogen ligase activity, with glutamine as amido-N-donor
GO:0009877	1	13	0.153838	0.150214	0.0448364	nodulation
GO:0043709	1	13	0.153838	0.150214	0.0448364	cell adhesion involved in single-species biofilm formation
GO:0005216	2	26	0.153838	0.136122	0.00206924	ion channel activity
GO:0006811	2	26	0.153838	0.136122	0.00206924	ion transport
GO:0009427	3	39	0.153838	0.123424	0.000107074	bacterial-type flagellum basal body, distal rod, L ring
GO:0015934	13	169	0.153838	0.0735843	4.68118e-17	large ribosomal subunit
GO:0006571	6	79	0.151891	0.0977695	1.20033e-08	tyrosine biosynthetic process
GO:0004665	6	79	0.151891	0.0977695	1.20033e-08	prephenate dehydrogenase (NADP+) activity
GO:0008977	6	79	0.151891	0.0977695	1.20033e-08	prephenate dehydrogenase (NAD+) activity
GO:0044780	17	230	0.147819	0.0631774	4.40789e-23	bacterial-type flagellum assembly
GO:0000413	11	150	0.146659	0.0750022	1.38716e-15	protein peptidyl-prolyl isomerization
GO:0008984	6	82	0.146334	0.0941374	4.81142e-09	protein-glutamate methylesterase activity
GO:0009103	12	165	0.145448	0.0717663	5.67037e-17	lipopolysaccharide biosynthetic process
GO:0004806	1	14	0.142851	0.139468	0.0279148	triglyceride lipase activity
GO:0009061	2	28	0.142851	0.126369	0.00138739	anaerobic respiration
GO:0070008	3	42	0.142851	0.114515	4.36792e-05	serine-type exopeptidase activity
GO:0016793	5	70	0.142851	0.0978605	5.37458e-08	triphosphoric monoester hydrolase activity
GO:0016818	8	113	0.141587	0.0818894	2.71675e-12	hydrolase activity, acting on acid anhydrides, in phosphorus-containing anhydrides
GO:0000287	28	396	0.141408	0.0486718	8.93688e-40	magnesium ion binding
GO:0006109	5	71	0.140839	0.0964638	5.60121e-08	regulation of carbohydrate metabolic process
GO:0008234	3	43	0.139529	0.111833	2.70851e-05	cysteine-type peptidase activity
GO:0016866	11	158	0.139234	0.0710899	9.16271e-17	intramolecular transferase activity
GO:1902604	2	29	0.137925	0.12199	0.000836253	p-aminobenzoyl-glutamate transmembrane transport
GO:0015558	2	29	0.137925	0.12199	0.000836253	secondary active p-aminobenzoyl-glutamate transmembrane transporter activity
GO:0004518	12	174	0.137925	0.0680253	2.26177e-18	nuclease activity
GO:1904680	7	102	0.137249	0.0834079	2.90035e-11	peptide transmembrane transporter activity
GO:0015986	8	117	0.136746	0.0790393	6.93145e-13	ATP synthesis coupled proton transport
GO:0045263	8	117	0.136746	0.0790393	6.93145e-13	proton-transporting ATP synthase complex, coupling factor F(o)
GO:0019634	3	44	0.136358	0.109271	1.71808e-05	organic phosphonate metabolic process
GO:0042834	9	132	0.136358	0.0753258	2.57006e-14	peptidoglycan binding
GO:0006071	1	15	0.133328	0.130157	0.0296455	glycerol metabolic process
GO:0009022	3	45	0.133328	0.106823	1.81001e-05	tRNA nucleotidyltransferase activity
GO:0006269	4	60	0.133328	0.0981163	3.74915e-07	DNA replication, synthesis of RNA primer
GO:0051604	4	61	0.131143	0.0965378	2.38509e-07	protein maturation
GO:0071555	20	305	0.131143	0.0521658	4.66867e-32	cell wall organization
GO:0009405	32	492	0.130077	0.0420812	3.80458e-51	pathogenesis
GO:0009245	5	77	0.129865	0.0888547	5.3535e-09	lipid A biosynthetic process
GO:0016836	5	77	0.129865	0.0888547	5.3535e-09	hydro-lyase activity
GO:0004386	19	296	0.128374	0.0521915	1.92629e-31	helicase activity
GO:0035429	10	156	0.128201	0.0679292	4.02462e-17	gluconate transmembrane transport
GO:0015128	10	156	0.128201	0.0679292	4.02462e-17	gluconate transmembrane transporter activity
GO:0009317	3	47	0.127655	0.102246	6.73755e-06	acetyl-CoA carboxylase complex
GO:0003989	3	47	0.127655	0.102246	6.73755e-06	acetyl-CoA carboxylase activity
GO:0008990	4	63	0.12698	0.0934258	1.50633e-07	rRNA (guanine-N2-)-methyltransferase activity
GO:0017000	8	126	0.12698	0.0733022	4.48039e-14	antibiotic biosynthetic process
GO:1901135	33	527	0.125233	0.0399019	9.82484e-56	carbohydrate derivative metabolic process
GO:0097367	33	527	0.125233	0.0399019	9.82484e-56	carbohydrate derivative binding
GO:0009072	1	16	0.124996	0.122011	0.0176492	aromatic amino acid family metabolic process
GO:0016701	1	16	0.124996	0.122011	0.0176492	oxidoreductase activity, acting on single donors with incorporation of molecular oxygen
GO:0003868	1	16	0.124996	0.122011	0.0176492	4-hydroxyphenylpyruvate dioxygenase activity
GO:0042242	1	16	0.124996	0.122011	0.0176492	cobyrinic acid a,c-diamide synthase activity
GO:0042168	2	32	0.124996	0.110507	0.000342706	heme metabolic process
GO:0043462	2	32	0.124996	0.110507	0.000342706	regulation of ATPase activity
GO:0006537	9	145	0.124134	0.0685105	2.58444e-16	glutamate biosynthetic process
GO:0006614	6	98	0.122445	0.0785725	1.94057e-11	SRP-dependent cotranslational protein targeting to membrane
GO:0003747	11	180	0.122218	0.0622839	6.36415e-20	translation release factor activity
GO:0070475	5	82	0.121947	0.0833737	8.47987e-10	rRNA base methylation
GO:0015225	2	33	0.121208	0.107147	0.00020482	biotin transmembrane transporter activity
GO:0015878	2	33	0.121208	0.107147	0.00020482	biotin transport
GO:0005886	29	483	0.120079	0.0404963	3.96809e-52	plasma membrane
GO:0043546	17	286	0.118878	0.0505908	2e-31	molybdopterin cofactor binding
GO:0000302	2	34	0.117644	0.103925	0.000125256	response to reactive oxygen species
GO:0008785	2	34	0.117644	0.103925	0.000125256	alkyl hydroperoxide reductase activity
GO:0016757	12	215	0.111625	0.0548432	1.32809e-24	transferase activity, transferring glycosyl groups
GO:0019534	2	36	0.111108	0.098136	8.30986e-05	toxin transmembrane transporter activity
GO:0009431	2	36	0.111108	0.098136	8.30986e-05	bacterial-type flagellum basal body, MS ring
GO:0009009	2	36	0.111108	0.098136	8.30986e-05	site-specific recombinase activity
GO:0010124	3	54	0.111108	0.0889129	6.53744e-07	phenylacetate catabolic process
GO:0016813	3	54	0.111108	0.0889129	6.53744e-07	hydrolase activity, acting on carbon-nitrogen (but not peptide) bonds, in linear amidines
GO:0008942	3	55	0.109088	0.087236	4.00308e-07	nitrite reductase [NAD(P)H] activity
GO:0009401	104	1918	0.108444	0.0202794	6.40557e-211	phosphoenolpyruvate-dependent sugar phosphotransferase system
GO:0070403	4	74	0.108106	0.0794072	3.69771e-09	NAD+ binding
GO:0015833	26	482	0.107881	0.0381582	3.44428e-54	peptide transport
GO:0043571	5	93	0.107524	0.0734141	1.95396e-11	maintenance of CRISPR repeat elements
GO:0051607	3	56	0.10714	0.0856727	2.51468e-07	defense response to virus
GO:0006400	8	151	0.105958	0.061032	6.09405e-18	tRNA modification
GO:0004133	1	19	0.105261	0.102723	0.00703176	glycogen debranching enzyme activity
GO:0005980	1	19	0.105261	0.102723	0.00703176	glycogen catabolic process
GO:0015112	3	58	0.103446	0.082738	1.57353e-07	nitrate transmembrane transporter activity
GO:0015706	3	58	0.103446	0.082738	1.57353e-07	nitrate transport
GO:0008887	6	118	0.101693	0.065114	1.67652e-14	glycerate kinase activity
GO:0031388	6	118	0.101693	0.065114	1.67652e-14	organic acid phosphorylation
GO:0006275	3	60	0.0999982	0.0799416	6.00822e-08	regulation of DNA replication
GO:0008276	8	160	0.0999982	0.0575554	2.1995e-19	protein methyltransferase activity
GO:0006402	5	102	0.0980375	0.0668773	7.1125e-13	mRNA catabolic process
GO:0019843	2	41	0.0975593	0.0861365	1.17063e-05	rRNA binding
GO:0006284	8	165	0.0969681	0.0557771	3.3342e-20	base-excision repair
GO:0071705	36	755	0.0953627	0.0290845	5.14273e-88	nitrogen compound transport
GO:0101006	1	21	0.0952366	0.0929295	0.00248251	protein histidine phosphatase activity
GO:0004298	2	42	0.0952366	0.0840707	7.08482e-06	threonine-type endopeptidase activity
GO:0006777	3	63	0.0952366	0.076115	2.2793e-08	Mo-molybdopterin cofactor biosynthetic process
GO:0000156	8	169	0.0946731	0.054431	7.95072e-21	phosphorelay response regulator activity
GO:0008649	7	148	0.0945931	0.0572196	2.17931e-18	rRNA methyltransferase activity
GO:0031167	4	85	0.0941162	0.0690473	4.83413e-11	rRNA methylation
GO:0016783	4	85	0.0941162	0.0690473	4.83413e-11	sulfurtransferase activity
GO:0034618	3	64	0.0937486	0.0748971	1.42213e-08	arginine binding
GO:0043365	3	65	0.0923063	0.0737436	1.51155e-08	[formate-C-acetyltransferase]-activating enzyme activity
GO:0033890	1	22	0.0909078	0.088701	0.0015288	ribonuclease D activity
GO:0008186	2	44	0.0909078	0.0802345	4.69275e-06	RNA-dependent ATPase activity
GO:0022904	3	67	0.089551	0.0715602	5.37035e-09	respiratory electron transport chain
GO:0050708	2	45	0.0888877	0.078445	2.74843e-06	regulation of protein secretion
GO:0031072	3	68	0.0882342	0.0704671	3.33849e-09	heat shock protein binding
GO:0019068	2	46	0.0869555	0.0767337	1.65498e-06	virion assembly
GO:0008962	2	47	0.0851054	0.0750955	1.02429e-06	phosphatidylglycerophosphatase activity
GO:0071709	2	47	0.0851054	0.0750955	1.02429e-06	membrane assembly
GO:0016817	4	94	0.0851054	0.0623639	2.87261e-12	hydrolase activity, acting on acid anhydrides
GO:0051259	3	71	0.0845061	0.0674851	1.2564e-09	protein complex oligomerization
GO:0002949	7	166	0.0843364	0.0509675	4.25888e-21	tRNA threonylcarbamoyladenosine modification
GO:0015689	8	190	0.0842096	0.0483779	6.31864e-24	molybdate ion transport
GO:0043335	1	24	0.0833324	0.0813019	0.000949536	protein unfolding
GO:0000062	1	24	0.0833324	0.0813019	0.000949536	fatty-acyl-CoA binding
GO:0043213	3	72	0.0833324	0.0665436	7.78019e-10	bacteriocin transport
GO:0008982	47	1135	0.0828185	0.0223458	6.1362e-138	protein-N(PI)-phosphohistidine-sugar phosphotransferase activity
GO:0033573	2	49	0.0816318	0.0720205	6.39383e-07	high-affinity iron permease complex
GO:0005381	2	49	0.0816318	0.0720205	6.39383e-07	iron ion transmembrane transporter activity
GO:0000179	2	49	0.0816318	0.0720205	6.39383e-07	rRNA (adenine-N6,N6-)-dimethyltransferase activity
GO:0034755	2	49	0.0816318	0.0720205	6.39383e-07	iron ion transmembrane transport
GO:0015137	1	25	0.0799992	0.0780466	0.000566754	citrate transmembrane transporter activity
GO:0015746	1	25	0.0799992	0.0780466	0.000566754	citrate transport
GO:0008829	2	50	0.0799992	0.0705757	3.83005e-07	dCTP deaminase activity
GO:0051301	11	278	0.079136	0.040088	3.20734e-35	cell division
GO:0008773	2	51	0.0784307	0.0691878	2.36025e-07	[protein-PII] uridylyltransferase activity
GO:0019627	1	26	0.0769224	0.075042	0.000347495	urea metabolic process
GO:0065003	1	26	0.0769224	0.075042	0.000347495	protein-containing complex assembly
GO:0009381	3	78	0.0769224	0.0614119	1.13322e-10	excinuclease ABC activity
GO:0006886	5	130	0.0769224	0.0523821	2.77608e-17	intracellular protein transport
GO:0006464	3	79	0.0759488	0.0606345	6.7546e-11	cellular protein modification process
GO:0043022	7	185	0.0756751	0.0456683	2.91828e-24	ribosome binding
GO:0030254	2	53	0.0754711	0.0665698	1.47618e-07	protein secretion by the type III secretion system
GO:0048500	2	53	0.0754711	0.0665698	1.47618e-07	signal recognition particle
GO:0032784	8	212	0.0754711	0.0433063	1.53585e-27	regulation of DNA-templated transcription, elongation
GO:0006633	5	134	0.0746263	0.0507928	6.41094e-18	fatty acid biosynthetic process
GO:0019866	1	27	0.0740735	0.0722601	0.000373102	organelle inner membrane
GO:0019629	1	27	0.0740735	0.0722601	0.000373102	propionate catabolic process, 2-methylcitrate cycle
GO:0015572	1	27	0.0740735	0.0722601	0.000373102	N-acetylglucosamine transmembrane transporter activity
GO:0032297	1	27	0.0740735	0.0722601	0.000373102	negative regulation of DNA-dependent DNA replication initiation
GO:0030488	2	55	0.0727268	0.064143	5.39487e-08	tRNA methylation
GO:0003333	5	139	0.071942	0.0489316	9.23379e-19	amino acid transmembrane transport
GO:0008920	1	28	0.0714281	0.0696771	0.000215344	lipopolysaccharide heptosyltransferase activity
GO:0016811	1	28	0.0714281	0.0696771	0.000215344	hydrolase activity, acting on carbon-nitrogen (but not peptide) bonds, in linear amides
GO:0018339	1	28	0.0714281	0.0696771	0.000215344	peptidyl-L-beta-methylthioaspartic acid biosynthetic process from peptidyl-aspartic acid
GO:0009244	1	28	0.0714281	0.0696771	0.000215344	lipopolysaccharide core region biosynthetic process
GO:0009426	1	28	0.0714281	0.0696771	0.000215344	bacterial-type flagellum basal body, distal rod
GO:0008381	2	56	0.0714281	0.0629949	5.89498e-08	mechanosensitive ion channel activity
GO:0006525	4	113	0.070796	0.0518501	1.76684e-15	arginine metabolic process
GO:0009376	3	86	0.069767	0.0556554	6.04147e-12	HslUV protease complex
GO:0015075	1	29	0.0689651	0.0672724	0.000127753	ion transmembrane transporter activity
GO:0016429	1	29	0.0689651	0.0672724	0.000127753	tRNA (adenine-N1-)-methyltransferase activity
GO:0008360	6	175	0.068571	0.0437513	1.52243e-23	regulation of cell shape
GO:0004654	2	60	0.0666663	0.0587869	7.68209e-09	polyribonucleotide nucleotidyltransferase activity
GO:0090529	3	90	0.0666663	0.0531702	1.3875e-12	cell septum assembly
GO:0034229	1	31	0.0645158	0.0629287	8.44918e-05	ethanolamine transport
GO:0034228	1	31	0.0645158	0.0629287	8.44918e-05	ethanolamine transmembrane transporter activity
GO:0035438	4	124	0.0645158	0.0472201	3.49746e-17	cyclic-di-GMP binding
GO:0032508	3	94	0.0638295	0.0508965	3.17736e-13	DNA duplex unwinding
GO:0035435	5	163	0.0613495	0.0416974	1.27475e-22	phosphate ion transmembrane transport
GO:0051131	1	33	0.0606058	0.0591118	2.85242e-05	chaperone-mediated protein complex assembly
GO:0045936	2	66	0.0606058	0.0534126	1.02777e-09	negative regulation of phosphate metabolic process
GO:0030643	2	66	0.0606058	0.0534126	1.02777e-09	cellular phosphate ion homeostasis
GO:0006479	4	132	0.0606058	0.0443355	1.81797e-18	protein methylation
GO:0009432	4	132	0.0606058	0.0443355	1.81797e-18	SOS response
GO:0015672	1	34	0.0588233	0.0573719	1.73232e-05	monovalent inorganic cation transport
GO:0004108	1	34	0.0588233	0.0573719	1.73232e-05	citrate (Si)-synthase activity
GO:0005451	1	34	0.0588233	0.0573719	1.73232e-05	monovalent cation:proton antiporter activity
GO:0006779	2	69	0.0579708	0.0510832	3.97801e-10	porphyrin-containing compound biosynthetic process
GO:0004109	2	69	0.0579708	0.0510832	3.97801e-10	coproporphyrinogen oxidase activity
GO:0042301	2	70	0.0571427	0.0503512	2.31195e-10	phosphate ion binding
GO:0015628	9	318	0.0566036	0.0309555	7.47212e-44	protein secretion by the type II secretion system
GO:0015627	9	318	0.0566036	0.0309555	7.47212e-44	type II protein secretion system complex
GO:0009276	3	107	0.0560746	0.0446784	2.15016e-15	Gram-negative-bacterium-type cell wall
GO:0019076	1	36	0.0555554	0.0541822	1.07951e-05	viral release from host cell
GO:0034219	2	73	0.0547944	0.0482756	8.98323e-11	carbohydrate transmembrane transport
GO:0004523	2	73	0.0547944	0.0482756	8.98323e-11	RNA-DNA hybrid ribonuclease activity
GO:0005576	7	258	0.0542634	0.0326762	4.67134e-36	extracellular region
GO:0015385	1	37	0.0540539	0.0527167	6.32303e-06	sodium:proton antiporter activity
GO:0008137	1	37	0.0540539	0.0527167	6.32303e-06	NADH dehydrogenase (ubiquinone) activity
GO:0008138	1	38	0.0526315	0.0513285	3.81929e-06	protein tyrosine/serine/threonine phosphatase activity
GO:0043165	1	38	0.0526315	0.0513285	3.81929e-06	Gram-negative-bacterium-type cell outer membrane assembly
GO:0048038	1	40	0.0499999	0.0487603	2.39659e-06	quinone binding
GO:0016311	1	40	0.0499999	0.0487603	2.39659e-06	dephosphorylation
GO:0044038	2	80	0.0499999	0.0440387	4.20012e-12	cell wall macromolecule biosynthetic process
GO:0016755	2	80	0.0499999	0.0440387	4.20012e-12	transferase activity, transferring amino-acyl groups
GO:0010468	1	41	0.0487804	0.0475702	1.39401e-06	regulation of gene expression
GO:0043708	1	44	0.0454545	0.0443247	5.30137e-07	cell adhesion involved in biofilm formation
GO:0070011	1	44	0.0454545	0.0443247	5.30137e-07	Nan
GO:0015444	1	44	0.0454545	0.0443247	5.30137e-07	magnesium transmembrane transporter activity, phosphorylative mechanism
GO:0008409	1	44	0.0454545	0.0443247	5.30137e-07	5'-3' exonuclease activity
GO:0015419	3	132	0.0454545	0.0362149	1.58269e-19	ATPase-coupled sulfate transmembrane transporter activity
GO:0019835	2	91	0.043956	0.0386987	7.44114e-14	cytolysis
GO:0016682	1	48	0.0416667	0.0406287	1.16976e-07	oxidoreductase activity, acting on diphenols and related substances as donors, oxygen as acceptor
GO:0003684	2	96	0.0416667	0.0366761	9.76919e-15	damaged DNA binding
GO:0016639	1	49	0.0408163	0.039799	6.70037e-08	oxidoreductase activity, acting on the CH-NH2 group of donors, NAD or NADP as acceptor
GO:0006229	1	49	0.0408163	0.039799	6.70037e-08	dUTP biosynthetic process
GO:0004536	1	51	0.0392157	0.0382373	2.42614e-08	deoxyribonuclease activity
GO:0018189	1	51	0.0392157	0.0382373	2.42614e-08	pyrroloquinoline quinone biosynthetic process
GO:0015693	2	103	0.038835	0.0341746	7.98545e-16	magnesium ion transport
GO:0005315	4	206	0.038835	0.0283751	6.82899e-31	inorganic phosphate transmembrane transporter activity
GO:0042773	1	54	0.0370371	0.0361118	8.60611e-09	ATP synthesis coupled electron transport
GO:1901891	1	55	0.0363637	0.0354548	5.22604e-09	regulation of cell septum assembly
GO:0051726	1	55	0.0363637	0.0354548	5.22604e-09	regulation of cell cycle
GO:0003906	2	111	0.0360361	0.0317021	3.8843e-17	DNA-(apurinic or apyrimidinic site) endonuclease activity
GO:0006474	1	57	0.0350877	0.0342101	3.19377e-09	N-terminal protein amino acid acetylation
GO:0015095	1	59	0.0338983	0.0330498	1.1231e-09	magnesium ion transmembrane transporter activity
GO:0009424	1	60	0.0333334	0.0324987	1.24838e-09	bacterial-type flagellum hook
GO:0004497	1	65	0.0307693	0.0299974	1.51856e-10	monooxygenase activity
GO:0015556	1	72	0.0277778	0.0270795	6.7276e-12	C4-dicarboxylate transmembrane transporter activity
GO:0015740	1	72	0.0277778	0.0270795	6.7276e-12	C4-dicarboxylate transport
GO:0030151	2	153	0.0261438	0.0230047	3.19379e-24	molybdenum ion binding
GO:0016149	1	99	0.0202021	0.0196909	2.34488e-16	translation release factor activity, codon specific
GO:0042953	1	99	0.0202021	0.0196909	2.34488e-16	lipoprotein transport
GO:0009289	4	413	0.0193705	0.0141246	4.90092e-66	pilus
GO:0003917	1	111	0.018018	0.017561	1.30993e-18	DNA topoisomerase type I (single strand cut, ATP-independent) activity
GO:0007155	2	467	0.00858343	0.00756394	9.64661e-79	cell adhesion
GO:0015473	1	274	0.00731244	0.0071224	7.1353e-47	fimbrial usher porin activity
GO:0009297	1	290	0.00690832	0.00672832	1.38509e-49	pilus assembly
GO:0008810	0	5	0	0	0.176954	cellulase activity
GO:0009697	0	8	0	0	0.0586794	salicylic acid biosynthetic process
GO:0010125	0	1	0	0	1	mycothiol biosynthetic process
GO:0016869	0	3	0	0	0.555555	intramolecular transferase activity, transferring amino groups
GO:0010045	0	5	0	0	0.176954	response to nickel cation
GO:0043828	0	31	0	0	7.37377e-06	tRNA 2-selenouridine synthase activity
GO:0006302	0	38	0	0	2.75835e-07	double-strand break repair
GO:0001848	0	6	0	0	0.187927	complement binding
GO:0009512	0	1	0	0	1	cytochrome b6f complex
GO:0004652	0	28	0	0	1.95613e-05	polynucleotide adenylyltransferase activity
GO:0016767	0	8	0	0	0.0586794	geranylgeranyl-diphosphate geranylgeranyltransferase activity
GO:0009246	0	44	0	0	3.67802e-08	enterobacterial common antigen biosynthetic process
GO:0004719	0	16	0	0	0.00231478	protein-L-isoaspartate (D-aspartate) O-methyltransferase activity
GO:0015846	0	58	0	0	1.02739e-10	polyamine transport
GO:1900754	0	1	0	0	1	4-hydroxyphenylacetate transport
GO:0048473	0	9	0	0	0.0342934	D-methionine transport
GO:0050830	0	4	0	0	0.308641	defense response to Gram-positive bacterium
GO:0034775	0	22	0	0	0.000164665	glutathione transmembrane transport
GO:0015753	0	13	0	0	0.00678588	D-xylose transmembrane transport
GO:0005186	0	3	0	0	0.555555	pheromone activity
GO:0006576	0	19	0	0	0.000831783	cellular biogenic amine metabolic process
GO:0016812	0	1	0	0	1	hydrolase activity, acting on carbon-nitrogen (but not peptide) bonds, in cyclic amides
GO:0051782	0	36	0	0	8.38212e-07	negative regulation of cell division
GO:0004016	0	24	0	0	9.53682e-05	adenylate cyclase activity
GO:0006378	0	28	0	0	1.95613e-05	mRNA polyadenylation
GO:0098609	0	1	0	0	1	cell-cell adhesion
GO:0015144	0	18	0	0	0.000821547	carbohydrate transmembrane transporter activity
GO:0044010	0	3	0	0	0.555555	single-species biofilm formation
GO:0005337	0	39	0	0	1.66861e-07	nucleoside transmembrane transporter activity
GO:0019865	0	10	0	0	0.0370018	immunoglobulin binding
GO:0015496	0	4	0	0	0.308641	putrescine:ornithine antiporter activity
GO:0050053	0	1	0	0	1	levansucrase activity
GO:0015499	0	20	0	0	0.000468052	formate transmembrane transporter activity
GO:1904659	0	16	0	0	0.00231478	glucose transmembrane transport
GO:0016785	0	31	0	0	7.37377e-06	transferase activity, transferring selenium-containing groups
GO:0051715	0	35	0	0	8.26732e-07	cytolysis in other organism
GO:0009152	0	30	0	0	6.6895e-06	purine ribonucleotide biosynthetic process
GO:0042601	0	1	0	0	1	endospore-forming forespore
GO:0018659	0	11	0	0	0.0203835	4-hydroxybenzoate 3-monooxygenase activity
GO:0004842	0	1	0	0	1	ubiquitin-protein transferase activity
GO:0015739	0	3	0	0	0.555555	sialic acid transport
GO:0016628	0	1	0	0	1	oxidoreductase activity, acting on the CH-CH group of donors, NAD or NADP as acceptor
GO:0016070	0	114	0	0	1.54586e-20	RNA metabolic process
GO:0009016	0	18	0	0	0.000821547	succinyldiaminopimelate transaminase activity
GO:0008417	0	22	0	0	0.000164665	fucosyltransferase activity
GO:0015077	0	2	0	0	1	monovalent inorganic cation transmembrane transporter activity
GO:0015171	0	13	0	0	0.00678588	amino acid transmembrane transporter activity
GO:0006527	0	8	0	0	0.0586794	arginine catabolic process
GO:0003963	0	14	0	0	0.0074644	RNA-3'-phosphate cyclase activity
GO:0000921	0	29	0	0	1.12364e-05	septin ring assembly
GO:0009411	0	1	0	0	1	response to UV
GO:0005267	0	17	0	0	0.00135641	potassium channel activity
GO:0046944	0	13	0	0	0.00678588	protein carbamoylation
GO:0009399	0	3	0	0	0.555555	nitrogen fixation
GO:0015173	0	31	0	0	7.37377e-06	aromatic amino acid transmembrane transporter activity
GO:0017121	0	1	0	0	1	plasma membrane phospholipid scrambling
GO:0019058	0	9	0	0	0.0342934	viral life cycle
GO:0008918	0	22	0	0	0.000164665	lipopolysaccharide 3-alpha-galactosyltransferase activity
GO:0016410	0	33	0	0	2.2967e-06	N-acyltransferase activity
GO:0015123	0	2	0	0	1	acetate transmembrane transporter activity
GO:0008859	0	13	0	0	0.00678588	exoribonuclease II activity
GO:0015926	0	16	0	0	0.00231478	glucosidase activity
GO:0030256	0	40	0	0	1.75066e-07	type I protein secretion system complex
GO:0030253	0	40	0	0	1.75066e-07	protein secretion by the type I secretion system
GO:0034639	0	8	0	0	0.0586794	L-amino acid efflux transmembrane transporter activity
GO:0016857	0	8	0	0	0.0586794	racemase and epimerase activity, acting on carbohydrates and derivatives
GO:0016999	0	1	0	0	1	antibiotic metabolic process
GO:0009338	0	56	0	0	1.72292e-10	exodeoxyribonuclease V complex
GO:0009486	0	4	0	0	0.308641	cytochrome bo3 ubiquinol oxidase activity
GO:0009339	0	10	0	0	0.0370018	glycolate oxidase complex
GO:0044668	0	7	0	0	0.103794	sodium:malonate symporter activity
GO:0018106	0	34	0	0	1.35577e-06	peptidyl-histidine phosphorylation
GO:0017128	0	1	0	0	1	phospholipid scramblase activity
GO:0031647	0	12	0	0	0.0115626	regulation of protein stability
GO:0047473	0	8	0	0	0.0586794	D-alanine [D-alanyl carrier protein] ligase activity
GO:0042026	0	17	0	0	0.00135641	protein refolding
GO:0015812	0	8	0	0	0.0586794	gamma-aminobutyric acid transport
GO:0043639	0	11	0	0	0.0203835	benzoate catabolic process
GO:0047334	0	3	0	0	0.555555	diphosphate-fructose-6-phosphate 1-phosphotransferase activity
GO:0019281	0	23	0	0	0.000170799	L-methionine biosynthetic process from homoserine via O-succinyl-L-homoserine and cystathionine
GO:0005618	0	74	0	0	2.03859e-13	cell wall
GO:0006096	0	3	0	0	0.555555	glycolytic process
GO:0004062	0	20	0	0	0.000468052	aryl sulfotransferase activity
GO:0050897	0	1	0	0	1	cobalt ion binding
GO:0019217	0	18	0	0	0.000821547	regulation of fatty acid metabolic process
GO:0005096	0	16	0	0	0.00231478	GTPase activator activity
GO:0042779	0	24	0	0	9.53682e-05	tRNA 3'-trailer cleavage
GO:0019941	0	1	0	0	1	modification-dependent protein catabolic process
GO:0019645	0	44	0	0	3.67802e-08	anaerobic electron transport chain
GO:0015218	0	3	0	0	0.555555	pyrimidine nucleotide transmembrane transporter activity
GO:0072344	0	19	0	0	0.000831783	rescue of stalled ribosome
GO:0015185	0	8	0	0	0.0586794	gamma-aminobutyric acid transmembrane transporter activity
GO:0090527	0	3	0	0	0.555555	actin filament reorganization
GO:0008514	0	15	0	0	0.00409054	organic anion transmembrane transporter activity
GO:0006518	0	55	0	0	2.86457e-10	peptide metabolic process
GO:0015887	0	10	0	0	0.0370018	pantothenate transmembrane transport
GO:0015136	0	3	0	0	0.555555	sialic acid transmembrane transporter activity
GO:0043858	0	8	0	0	0.0586794	arginine:ornithine antiporter activity
GO:0004499	0	43	0	0	3.37827e-08	N,N-dimethylaniline monooxygenase activity
GO:0015724	0	20	0	0	0.000468052	formate transport
GO:0047286	0	7	0	0	0.103794	NAD+-diphthamide ADP-ribosyltransferase activity
GO:0019531	0	2	0	0	1	oxalate transmembrane transporter activity
GO:0015822	0	4	0	0	0.308641	ornithine transport
GO:0015734	0	21	0	0	0.000272981	taurine transport
GO:0016742	0	30	0	0	6.6895e-06	hydroxymethyl-, formyl- and related transferase activity
GO:0015002	0	6	0	0	0.187927	heme-copper terminal oxidase activity
GO:0015794	0	8	0	0	0.0586794	glycerol-3-phosphate transmembrane transport
GO:0051116	0	14	0	0	0.0074644	cobaltochelatase activity
GO:0043805	0	3	0	0	0.555555	indolepyruvate ferredoxin oxidoreductase activity
GO:0001510	0	36	0	0	8.38212e-07	RNA methylation
GO:0031460	0	49	0	0	4.21737e-09	glycine betaine transport
GO:0009312	0	9	0	0	0.0342934	oligosaccharide biosynthetic process
GO:0033390	0	1	0	0	1	putrescine biosynthetic process from arginine via N-carbamoylputrescine
GO:0004620	0	1	0	0	1	phospholipase activity
GO:0051191	0	14	0	0	0.0074644	prosthetic group biosynthetic process
GO:0036370	0	18	0	0	0.000821547	D-alanyl carrier activity
GO:0015851	0	45	0	0	2.02128e-08	nucleobase transport
GO:0015914	0	36	0	0	8.38212e-07	phospholipid transport
GO:0044403	0	1	0	0	1	biological process involved in symbiotic interaction
GO:0008017	0	1	0	0	1	microtubule binding
GO:0046325	0	10	0	0	0.0370018	negative regulation of glucose import
GO:0036376	0	10	0	0	0.0370018	sodium ion export across plasma membrane
GO:0044262	0	5	0	0	0.176954	cellular carbohydrate metabolic process
GO:0004638	0	28	0	0	1.95613e-05	phosphoribosylaminoimidazole carboxylase activity
GO:0019532	0	2	0	0	1	oxalate transport
GO:0097573	0	3	0	0	0.555555	glutathione oxidoreductase activity
GO:1900753	0	2	0	0	1	doxorubicin transport
GO:0009882	0	19	0	0	0.000831783	blue light photoreceptor activity
GO:0015711	0	15	0	0	0.00409054	organic anion transport
GO:0042128	0	29	0	0	1.12364e-05	nitrate assimilation
GO:0033644	0	2	0	0	1	host cell membrane
GO:0015153	0	17	0	0	0.00135641	rhamnose transmembrane transporter activity
GO:0015847	0	4	0	0	0.308641	putrescine transport
GO:0036094	0	18	0	0	0.000821547	small molecule binding
GO:0008798	0	8	0	0	0.0586794	beta-aspartyl-peptidase activity
GO:0008657	0	7	0	0	0.103794	DNA topoisomerase type II (double strand cut, ATP-hydrolyzing) inhibitor activity
GO:0010498	0	1	0	0	1	proteasomal protein catabolic process
GO:0042262	0	4	0	0	0.308641	DNA protection
GO:0006106	0	11	0	0	0.0203835	fumarate metabolic process
GO:0019619	0	4	0	0	0.308641	3,4-dihydroxybenzoate catabolic process
GO:0015386	0	3	0	0	0.555555	potassium:proton antiporter activity
GO:0015762	0	3	0	0	0.555555	rhamnose transmembrane transport
GO:0008271	0	18	0	0	0.000821547	secondary active sulfate transmembrane transporter activity
GO:0017009	0	1	0	0	1	protein-phycocyanobilin linkage
GO:0002943	0	27	0	0	3.5359e-05	tRNA dihydrouridine synthesis
GO:0051060	0	2	0	0	1	pullulanase activity
GO:0009056	0	12	0	0	0.0115626	catabolic process
GO:0015169	0	8	0	0	0.0586794	glycerol-3-phosphate transmembrane transporter activity
GO:0006744	0	35	0	0	8.26732e-07	ubiquinone biosynthetic process
GO:0031419	0	9	0	0	0.0342934	cobalamin binding
GO:0005355	0	16	0	0	0.00231478	glucose transmembrane transporter activity
GO:0005354	0	1	0	0	1	galactose transmembrane transporter activity
GO:0008838	0	11	0	0	0.0203835	diaminopropionate ammonia-lyase activity
GO:0009408	0	66	0	0	4.52504e-12	response to heat
GO:0016881	0	62	0	0	2.1502e-11	acid-amino acid ligase activity
GO:0071934	0	17	0	0	0.00135641	thiamine transmembrane transport
GO:0043215	0	2	0	0	1	daunorubicin transport
GO:0016405	0	3	0	0	0.555555	CoA-ligase activity
GO:0009089	0	18	0	0	0.000821547	lysine biosynthetic process via diaminopimelate
GO:0009085	0	1	0	0	1	lysine biosynthetic process
GO:0015113	0	29	0	0	1.12364e-05	nitrite transmembrane transporter activity
GO:0004175	0	6	0	0	0.187927	endopeptidase activity
GO:0004644	0	30	0	0	6.6895e-06	phosphoribosylglycinamide formyltransferase activity
GO:0019679	0	35	0	0	8.26732e-07	propionate metabolic process, methylcitrate cycle
GO:0044874	0	6	0	0	0.187927	lipoprotein localization to outer membrane
GO:0001514	0	35	0	0	8.26732e-07	selenocysteine incorporation
GO:0033212	0	8	0	0	0.0586794	iron import into cell
GO:0008047	0	29	0	0	1.12364e-05	enzyme activator activity
GO:0050498	0	15	0	0	0.00409054	oxidoreductase activity, acting on paired donors, with incorporation or reduction of molecular oxygen, with 2-oxoglutarate as one donor, and the other dehydrogenated
GO:0016844	0	7	0	0	0.103794	strictosidine synthase activity
GO:0031532	0	1	0	0	1	actin cytoskeleton reorganization
GO:0006797	0	9	0	0	0.0342934	polyphosphate metabolic process
GO:0015150	0	8	0	0	0.0586794	fucose transmembrane transporter activity
GO:0046999	0	5	0	0	0.176954	regulation of conjugation
GO:0006793	0	20	0	0	0.000468052	phosphorus metabolic process
GO:0015614	0	6	0	0	0.187927	ATPase-coupled D-xylose transmembrane transporter activity
GO:0015944	0	36	0	0	8.38212e-07	formate oxidation
GO:0008899	0	23	0	0	0.000170799	homoserine O-succinyltransferase activity
GO:0003867	0	13	0	0	0.00678588	4-aminobutyrate transaminase activity
GO:0015220	0	6	0	0	0.187927	choline transmembrane transporter activity
GO:0005978	0	14	0	0	0.0074644	glycogen biosynthetic process
GO:0006555	0	11	0	0	0.0203835	methionine metabolic process
GO:0034040	0	30	0	0	6.6895e-06	ATPase-coupled lipid transmembrane transporter activity
GO:0008645	0	17	0	0	0.00135641	hexose transmembrane transport
GO:0045182	0	7	0	0	0.103794	translation regulator activity
GO:0046690	0	24	0	0	9.53682e-05	response to tellurium ion
GO:0005518	0	23	0	0	0.000170799	collagen binding
GO:0030418	0	7	0	0	0.103794	nicotianamine biosynthetic process
GO:0045982	0	21	0	0	0.000272981	negative regulation of purine nucleobase metabolic process
GO:1901241	0	1	0	0	1	4-hydroxyphenylacetate transmembrane transporter activity
GO:0008668	0	6	0	0	0.187927	(2,3-dihydroxybenzoyl)adenylate synthase activity
GO:0015087	0	34	0	0	1.35577e-06	cobalt ion transmembrane transporter activity
GO:0015081	0	10	0	0	0.0370018	sodium ion transmembrane transporter activity
GO:0016625	0	19	0	0	0.000831783	oxidoreductase activity, acting on the aldehyde or oxo group of donors, iron-sulfur protein as acceptor
GO:0009898	0	17	0	0	0.00135641	cytoplasmic side of plasma membrane
GO:0019350	0	18	0	0	0.000821547	teichoic acid biosynthetic process
GO:0006171	0	24	0	0	9.53682e-05	cAMP biosynthetic process
GO:0030420	0	61	0	0	3.96157e-11	establishment of competence for transformation
GO:0009448	0	13	0	0	0.00678588	gamma-aminobutyric acid metabolic process
GO:0042121	0	20	0	0	0.000468052	alginic acid biosynthetic process
GO:0019516	0	13	0	0	0.00678588	lactate oxidation
GO:0045436	0	1	0	0	1	lycopene beta cyclase activity
GO:0015649	0	20	0	0	0.000468052	2-keto-3-deoxygluconate:proton symporter activity
GO:0004824	0	8	0	0	0.0586794	lysine-tRNA ligase activity
GO:0015801	0	31	0	0	7.37377e-06	aromatic amino acid transport
GO:0030612	0	3	0	0	0.555555	arsenate reductase (thioredoxin) activity
GO:0045490	0	9	0	0	0.0342934	pectin catabolic process
GO:0071268	0	16	0	0	0.00231478	homocysteine biosynthetic process
GO:0008940	0	38	0	0	2.75835e-07	nitrate reductase activity
GO:0046556	0	1	0	0	1	alpha-L-arabinofuranosidase activity
GO:0006824	0	60	0	0	3.50473e-11	cobalt ion transport
GO:0031412	0	1	0	0	1	gas vesicle organization
GO:0046559	0	3	0	0	0.555555	alpha-glucuronidase activity
GO:0044873	0	37	0	0	4.71768e-07	lipoprotein localization to membrane
GO:0000724	0	4	0	0	0.308641	double-strand break repair via homologous recombination
GO:0051470	0	2	0	0	1	ectoine transport
GO:0019836	0	8	0	0	0.0586794	hemolysis by symbiont of host erythrocytes
GO:0050451	0	2	0	0	1	CoA-disulfide reductase activity
GO:0030975	0	17	0	0	0.00135641	thiamine binding
GO:0006864	0	3	0	0	0.555555	pyrimidine nucleotide transport
GO:0008891	0	10	0	0	0.0370018	glycolate oxidase activity
GO:0007156	0	1	0	0	1	homophilic cell adhesion via plasma membrane adhesion molecules
GO:0045300	0	1	0	0	1	acyl-[acyl-carrier-protein] desaturase activity
GO:0004309	0	20	0	0	0.000468052	exopolyphosphatase activity
GO:0006817	0	100	0	0	2.93496e-18	phosphate ion transport
GO:0001000	0	2	0	0	1	bacterial-type RNA polymerase core enzyme binding
GO:0045333	0	92	0	0	1.2084e-16	cellular respiration
GO:0012506	0	2	0	0	1	vesicle membrane
GO:0047151	0	21	0	0	0.000272981	methylenetetrahydrofolate-tRNA-(uracil-5-)-methyltransferase (FADH2-oxidizing) activity
GO:0015233	0	10	0	0	0.0370018	pantothenate transmembrane transporter activity
GO:0009750	0	25	0	0	5.52436e-05	response to fructose
GO:0006952	0	2	0	0	1	defense response
GO:0043093	0	13	0	0	0.00678588	FtsZ-dependent cytokinesis
GO:0031402	0	18	0	0	0.000821547	sodium ion binding
GO:0016835	0	8	0	0	0.0586794	carbon-oxygen lyase activity
GO:0016837	0	9	0	0	0.0342934	carbon-oxygen lyase activity, acting on polysaccharides
GO:0051908	0	4	0	0	0.308641	double-stranded DNA 5'-3' exodeoxyribonuclease activity
GO:0042742	0	16	0	0	0.00231478	defense response to bacterium
GO:0015098	0	82	0	0	4.5451e-15	molybdate ion transmembrane transporter activity
GO:0006189	0	28	0	0	1.95613e-05	'de novo' IMP biosynthetic process
GO:0046411	0	20	0	0	0.000468052	2-keto-3-deoxygluconate transmembrane transport
GO:0045148	0	55	0	0	2.86457e-10	tripeptide aminopeptidase activity
GO:0015577	0	9	0	0	0.0342934	galactitol transmembrane transporter activity
GO:0006430	0	8	0	0	0.0586794	lysyl-tRNA aminoacylation
GO:0046170	0	1	0	0	1	methanol catabolic process
GO:0030152	0	1	0	0	1	bacteriocin biosynthetic process
GO:0031012	0	11	0	0	0.0203835	extracellular matrix
GO:0030248	0	2	0	0	1	cellulose binding
GO:0019213	0	7	0	0	0.103794	deacetylase activity
GO:0030077	0	1	0	0	1	plasma membrane light-harvesting complex
GO:0003756	0	2	0	0	1	protein disulfide isomerase activity
GO:0015379	0	15	0	0	0.00409054	potassium:chloride symporter activity
GO:0060567	0	21	0	0	0.000272981	negative regulation of DNA-templated transcription, termination
GO:0042802	0	5	0	0	0.176954	identical protein binding
GO:0009325	0	38	0	0	2.75835e-07	nitrate reductase complex
GO:0009326	0	33	0	0	2.2967e-06	formate dehydrogenase complex
GO:0030247	0	1	0	0	1	polysaccharide binding
GO:0006388	0	13	0	0	0.00678588	tRNA splicing, via endonucleolytic cleavage and ligation
GO:0003858	0	29	0	0	1.12364e-05	3-hydroxybutyrate dehydrogenase activity
GO:0004867	0	45	0	0	2.02128e-08	serine-type endopeptidase inhibitor activity
GO:0016485	0	10	0	0	0.0370018	protein processing
GO:0030244	0	26	0	0	3.31289e-05	cellulose biosynthetic process
GO:0035446	0	1	0	0	1	cysteine-glucosaminylinositol ligase activity
GO:0071793	0	5	0	0	0.176954	bacillithiol biosynthetic process
GO:0008430	0	6	0	0	0.187927	selenium binding
GO:0015888	0	38	0	0	2.75835e-07	thiamine transport
GO:0015889	0	12	0	0	0.0115626	cobalamin transport
GO:0006323	0	53	0	0	8.84817e-10	DNA packaging
GO:0008534	0	47	0	0	6.86283e-09	oxidized purine nucleobase lesion DNA N-glycosylase activity
GO:0005829	0	3	0	0	0.555555	cytosol
GO:0033223	0	4	0	0	0.308641	2-aminoethylphosphonate transport
GO:0009020	0	15	0	0	0.00409054	tRNA (guanosine-2'-O-)-methyltransferase activity
GO:0008775	0	35	0	0	8.26732e-07	acetate CoA-transferase activity
GO:0015824	0	18	0	0	0.000821547	proline transport
GO:0031639	0	2	0	0	1	plasminogen activation
GO:0016436	0	26	0	0	3.31289e-05	rRNA (uridine) methyltransferase activity
GO:0006212	0	5	0	0	0.176954	uracil catabolic process
GO:1901023	0	9	0	0	0.0342934	4-hydroxyphenylacetate catabolic process
GO:0090630	0	1	0	0	1	activation of GTPase activity
GO:0005298	0	18	0	0	0.000821547	proline:sodium symporter activity
GO:0015756	0	8	0	0	0.0586794	fucose transmembrane transport
GO:0015757	0	1	0	0	1	galactose transmembrane transport
GO:0008691	0	2	0	0	1	3-hydroxybutyryl-CoA dehydrogenase activity
GO:0008757	0	55	0	0	2.86457e-10	S-adenosylmethionine-dependent methyltransferase activity
GO:0018298	0	15	0	0	0.00409054	protein-chromophore linkage
GO:0043822	0	14	0	0	0.0074644	ribonuclease M5 activity
GO:0047111	0	23	0	0	0.000170799	formate dehydrogenase (cytochrome-c-553) activity
GO:0043214	0	3	0	0	0.555555	ATPase-coupled bacteriocin transmembrane transporter activity
GO:0055052	0	6	0	0	0.187927	ATP-binding cassette (ABC) transporter complex, substrate-binding subunit-containing
GO:0071468	0	21	0	0	0.000272981	cellular response to acidic pH
GO:0050485	0	21	0	0	0.000272981	oxidoreductase activity, acting on X-H and Y-H to form an X-Y bond, with a disulfide as acceptor
GO:0004645	0	7	0	0	0.103794	1,4-alpha-oligoglucan phosphorylase activity
GO:0016891	0	24	0	0	9.53682e-05	endoribonuclease activity, producing 5'-phosphomonoesters
GO:0030908	0	2	0	0	1	protein splicing
GO:0008901	0	30	0	0	6.6895e-06	ferredoxin hydrogenase activity
GO:0044179	0	8	0	0	0.0586794	hemolysis in other organism
GO:0045900	0	19	0	0	0.000831783	negative regulation of translational elongation
GO:0008854	0	74	0	0	2.03859e-13	exodeoxyribonuclease V activity
GO:0015871	0	26	0	0	3.31289e-05	choline transport
GO:0008289	0	7	0	0	0.103794	lipid binding
GO:0002143	0	40	0	0	1.75066e-07	tRNA wobble position uridine thiolation
GO:0045301	0	19	0	0	0.000831783	tRNA-(2-methylthio-N-6-(cis-hydroxy)isopentenyl adenosine)-hydroxylase activity
GO:0015234	0	9	0	0	0.0342934	thiamine transmembrane transporter activity
GO:0005940	0	29	0	0	1.12364e-05	septin ring
GO:0006547	0	20	0	0	0.000468052	histidine metabolic process
GO:0009758	0	1	0	0	1	carbohydrate utilization
GO:0033294	0	2	0	0	1	ectoine binding
GO:0003986	0	35	0	0	8.26732e-07	acetyl-CoA hydrolase activity
GO:0006268	0	23	0	0	0.000170799	DNA unwinding involved in DNA replication
GO:0019333	0	11	0	0	0.0203835	denitrification pathway
GO:0015675	0	20	0	0	0.000468052	nickel cation transport
GO:0003913	0	1	0	0	1	DNA photolyase activity
GO:0002098	0	31	0	0	7.37377e-06	tRNA wobble uridine modification
GO:0030697	0	19	0	0	0.000831783	S-adenosylmethionine-dependent tRNA (m5U54) methyltransferase activity
GO:0010447	0	4	0	0	0.308641	response to acidic pH
GO:0000502	0	1	0	0	1	proteasome complex
GO:0015091	0	1	0	0	1	ferric iron transmembrane transporter activity
GO:0016614	0	31	0	0	7.37377e-06	oxidoreductase activity, acting on CH-OH group of donors
GO:0071918	0	5	0	0	0.176954	urea transmembrane transport
GO:0045910	0	9	0	0	0.0342934	negative regulation of DNA recombination
GO:0019439	0	16	0	0	0.00231478	aromatic compound catabolic process
GO:0043139	0	23	0	0	0.000170799	5'-3' DNA helicase activity
GO:0008664	0	28	0	0	1.95613e-05	2'-5'-RNA ligase activity
GO:0015707	0	29	0	0	1.12364e-05	nitrite transport
GO:0009375	0	25	0	0	5.52436e-05	ferredoxin hydrogenase complex
GO:0072488	0	36	0	0	8.38212e-07	ammonium transmembrane transport
GO:0009274	0	3	0	0	0.555555	peptidoglycan-based cell wall
GO:0007062	0	33	0	0	2.2967e-06	sister chromatid cohesion
GO:0050709	0	9	0	0	0.0342934	negative regulation of protein secretion
GO:0015796	0	9	0	0	0.0342934	galactitol transport
GO:0016760	0	8	0	0	0.0586794	cellulose synthase (UDP-forming) activity
GO:0043751	0	9	0	0	0.0342934	polyphosphate:AMP phosphotransferase activity
GO:0015417	0	58	0	0	1.02739e-10	ATPase-coupled polyamine transmembrane transporter activity
GO:0043879	0	2	0	0	1	glycolate transmembrane transporter activity
GO:0048474	0	9	0	0	0.0342934	D-methionine transmembrane transporter activity
GO:0008681	0	15	0	0	0.00409054	2-octaprenyl-6-methoxyphenol hydroxylase activity
GO:0030598	0	2	0	0	1	rRNA N-glycosylase activity
GO:0019104	0	41	0	0	9.73972e-08	DNA N-glycosylase activity
GO:0016117	0	19	0	0	0.000831783	carotenoid biosynthetic process
GO:0046373	0	1	0	0	1	L-arabinose metabolic process
GO:0008863	0	77	0	0	3.67761e-14	formate dehydrogenase (NAD+) activity
GO:0009389	0	24	0	0	9.53682e-05	dimethyl sulfoxide reductase activity
GO:0033265	0	20	0	0	0.000468052	choline binding
GO:0008948	0	6	0	0	0.187927	oxaloacetate decarboxylase activity
GO:0008849	0	30	0	0	6.6895e-06	enterochelin esterase activity
GO:0015936	0	10	0	0	0.0370018	coenzyme A metabolic process
GO:0030257	0	27	0	0	3.5359e-05	type III protein secretion system complex
GO:0048029	0	7	0	0	0.103794	monosaccharide binding
GO:0007154	0	3	0	0	0.555555	cell communication
GO:0050231	0	1	0	0	1	putrescine carbamoyltransferase activity
GO:0042883	0	20	0	0	0.000468052	cysteine transport
GO:0031411	0	1	0	0	1	gas vesicle
GO:0000041	0	19	0	0	0.000831783	transition metal ion transport
GO:0001727	0	24	0	0	9.53682e-05	lipid kinase activity
GO:1901515	0	15	0	0	0.00409054	poly-beta-1,6-N-acetyl-D-glucosamine transmembrane transporter activity
GO:0022611	0	3	0	0	0.555555	dormancy process
GO:0045493	0	3	0	0	0.555555	xylan catabolic process
GO:0004113	0	28	0	0	1.95613e-05	2',3'-cyclic-nucleotide 3'-phosphodiesterase activity
GO:0015413	0	7	0	0	0.103794	ATPase-coupled nickel transmembrane transporter activity
GO:0030004	0	2	0	0	1	cellular monovalent inorganic cation homeostasis
GO:0030410	0	7	0	0	0.103794	nicotianamine synthase activity
GO:0018480	0	9	0	0	0.0342934	5-carboxymethyl-2-hydroxymuconic-semialdehyde dehydrogenase activity
GO:0015858	0	39	0	0	1.66861e-07	nucleoside transport
GO:0009986	0	9	0	0	0.0342934	cell surface
GO:0006084	0	15	0	0	0.00409054	acetyl-CoA metabolic process
GO:0030492	0	3	0	0	0.555555	hemoglobin binding
GO:0006083	0	35	0	0	8.26732e-07	acetate metabolic process
GO:0015204	0	5	0	0	0.176954	urea transmembrane transporter activity
GO:0005991	0	11	0	0	0.0203835	trehalose metabolic process
GO:0003688	0	43	0	0	3.37827e-08	DNA replication origin binding
GO:0017148	0	5	0	0	0.176954	negative regulation of translation
GO:0015420	0	12	0	0	0.0115626	ATPase-coupled vitamin B12 transmembrane transporter activity
GO:0090305	0	4	0	0	0.308641	nucleic acid phosphodiester bond hydrolysis
GO:0006465	0	22	0	0	0.000164665	signal peptide processing
GO:0004106	0	8	0	0	0.0586794	chorismate mutase activity
GO:0018817	0	16	0	0	0.00231478	2-oxo-hept-3-ene-1,7-dioate hydratase activity
GO:0006011	0	36	0	0	8.38212e-07	UDP-glucose metabolic process
GO:0005253	0	3	0	0	0.555555	anion channel activity
GO:0006401	0	31	0	0	7.37377e-06	RNA catabolic process
GO:0036065	0	22	0	0	0.000164665	fucosylation
GO:0009584	0	15	0	0	0.00409054	detection of visible light
GO:0070329	0	31	0	0	7.37377e-06	tRNA seleno-modification
GO:0019299	0	5	0	0	0.176954	rhamnose metabolic process
GO:0046278	0	18	0	0	0.000821547	3,4-dihydroxybenzoate metabolic process
GO:0070395	0	8	0	0	0.0586794	lipoteichoic acid biosynthetic process
GO:0052547	0	18	0	0	0.000821547	regulation of peptidase activity
