# Supplementary figures and images for: Identical sequences found in distant genomes reveal frequent horizontal transfer across the bacterial domain
Source: eLife journal article supplement (doi:10.7554/elife.62719), 2021-06-14

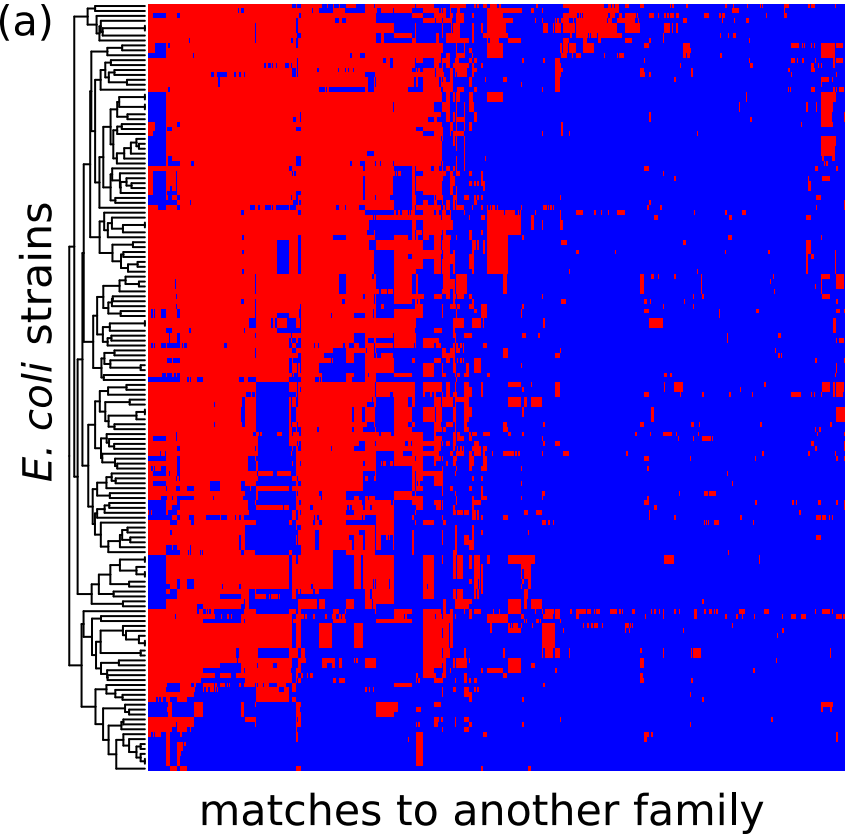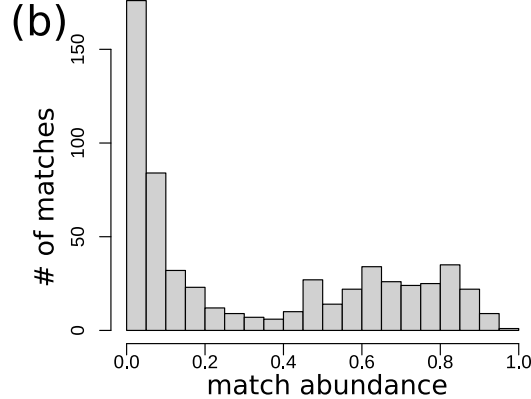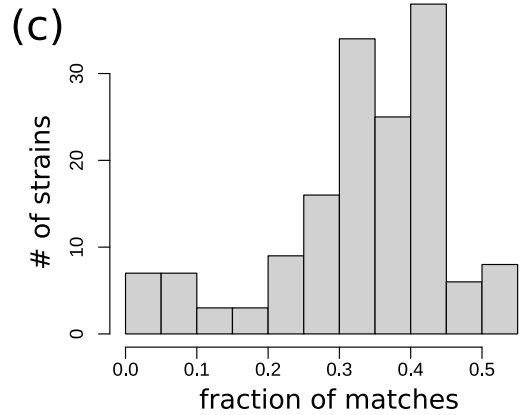

Supplement: supp [file elife-62719-supp-v1.zip]

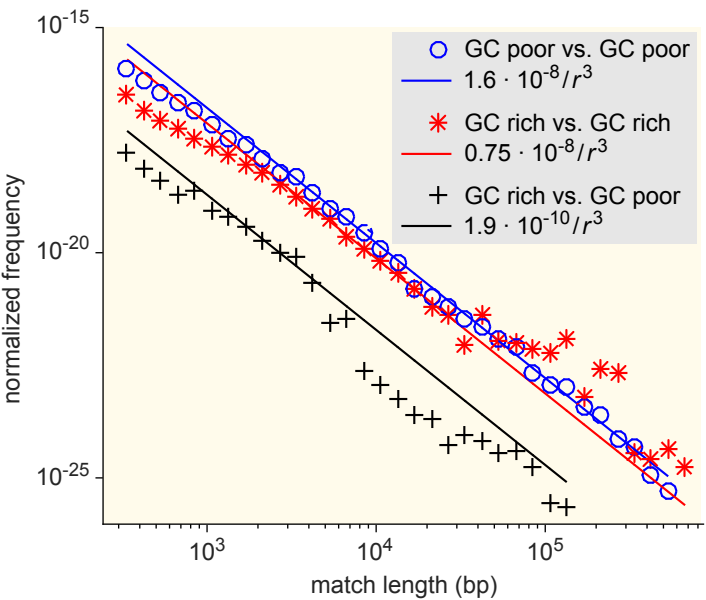

Supplement: supp [file elife-62719-supp-v1.zip]

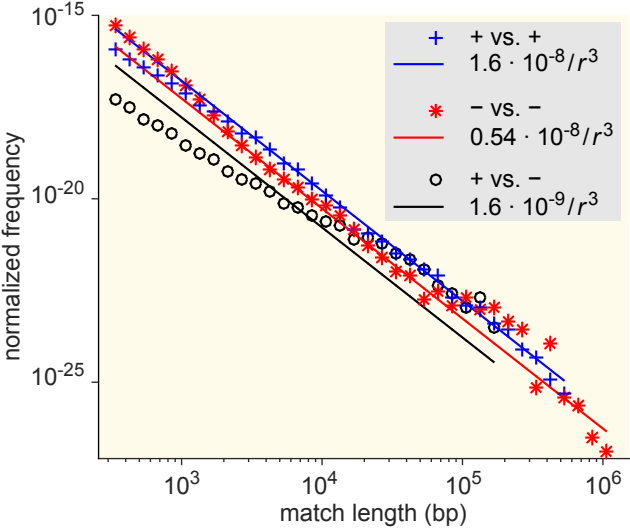

Supplement: supp [file elife-62719-supp-v1.zip]

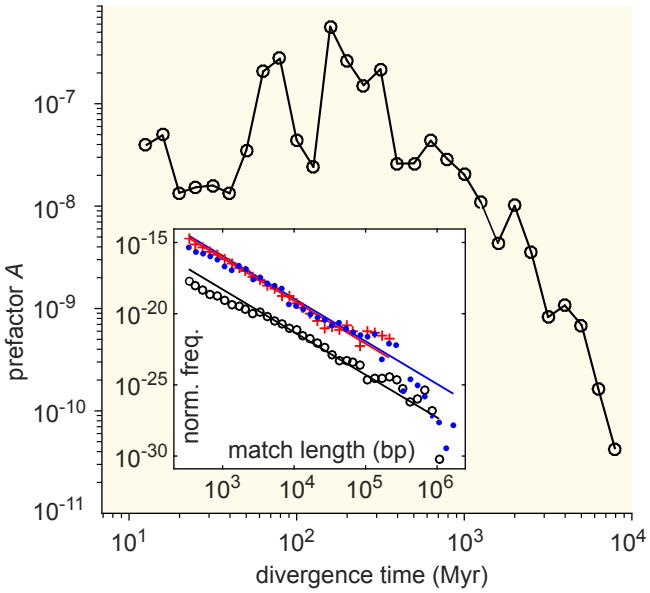

Supplement: supp [file elife-62719-supp-v1.zip]

*E. coli* strains

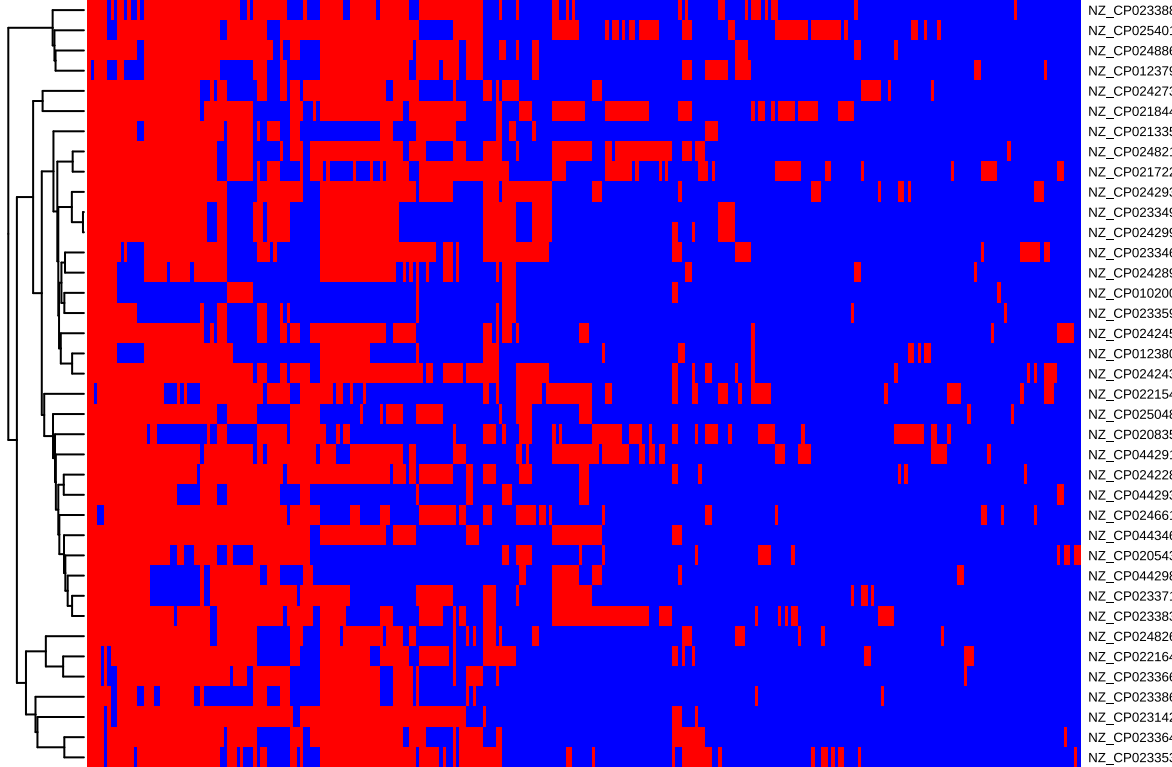

matches to another family

Supplement: supp [file elife-62719-supp-v1.zip]

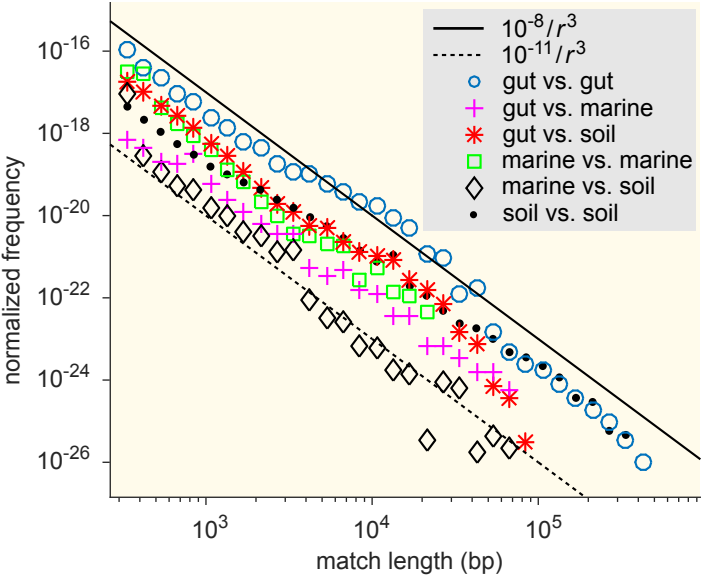

Supplement: supp [file elife-62719-supp-v1.zip]

B. Xylanisolvans

**A**

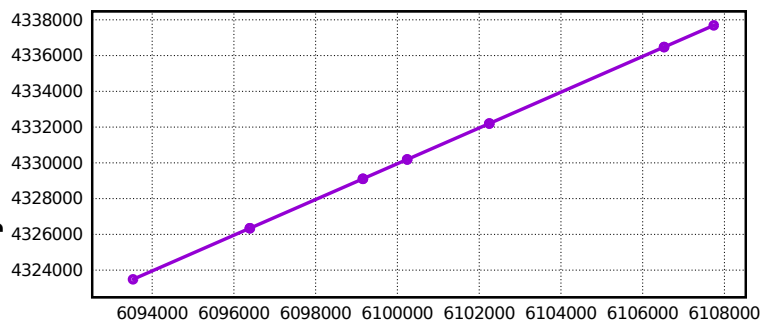

O. Splanchnicus

**B**

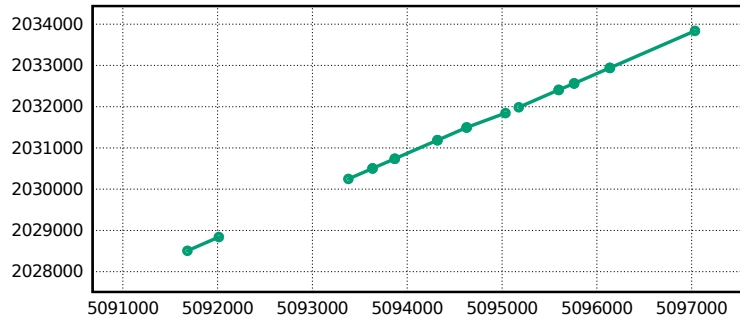

**C**

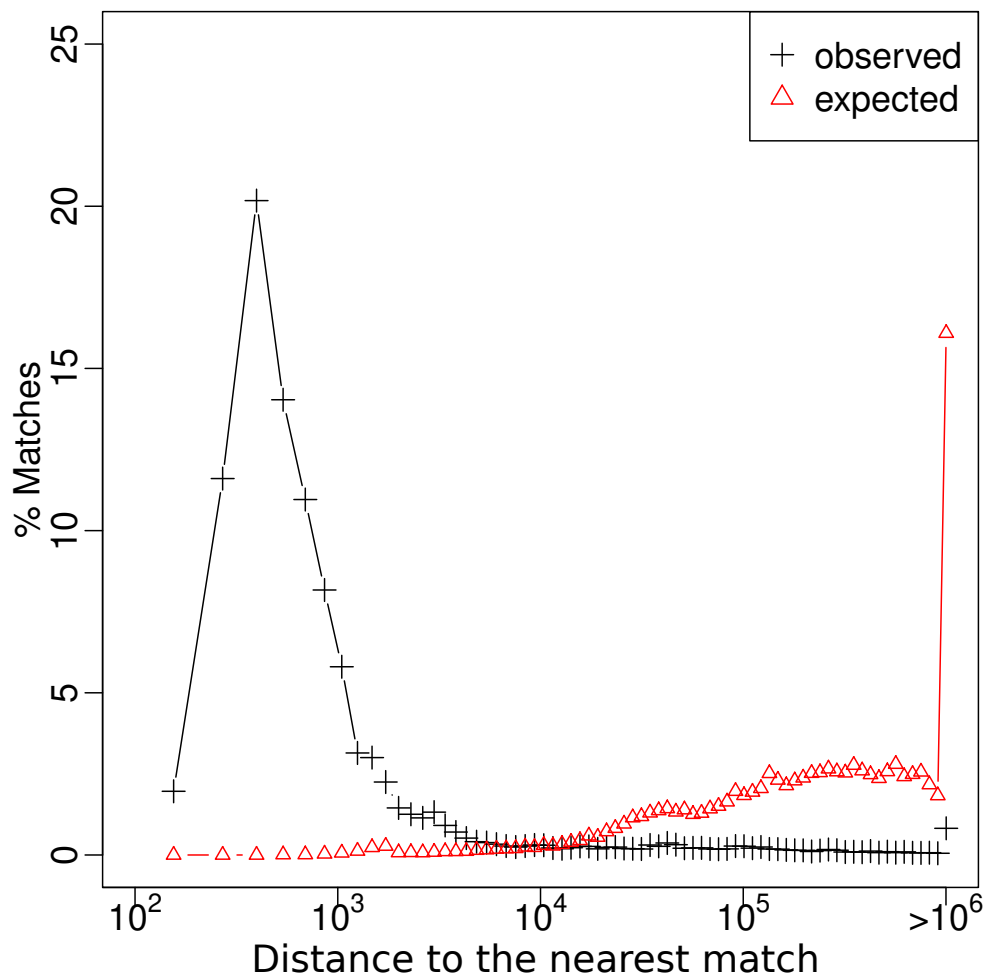

Supplement: supp [file elife-62719-supp-v1.zip]

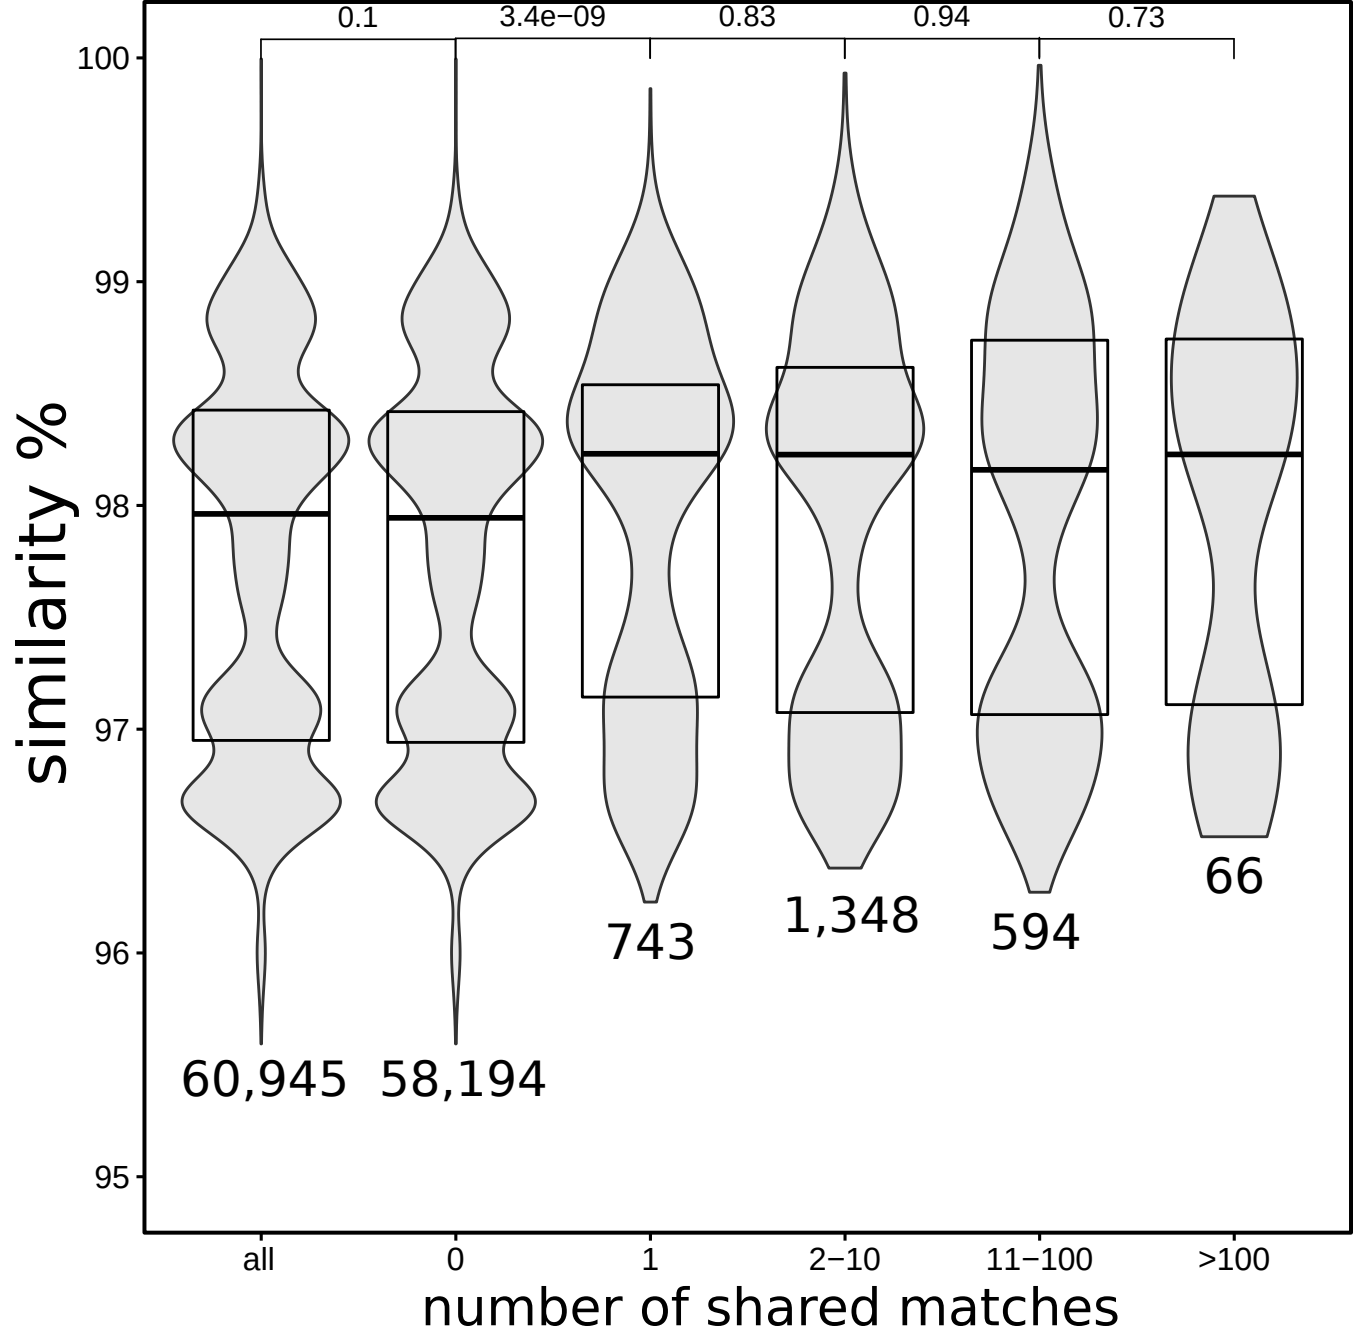

Supplement: supp [file elife-62719-supp-v1.zip]

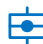

families with HGT

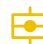

families w/o HGT

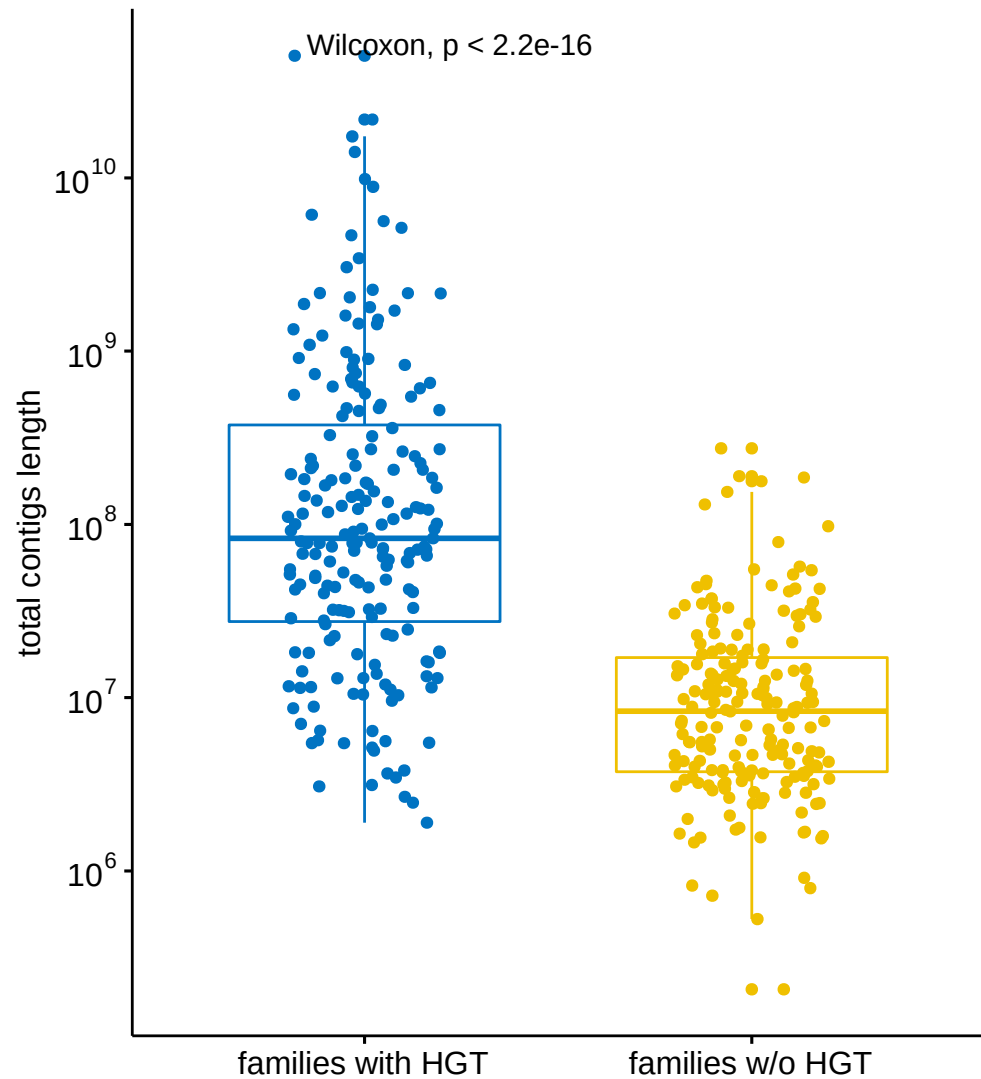

Supplement: supp [file elife-62719-supp-v1.zip]

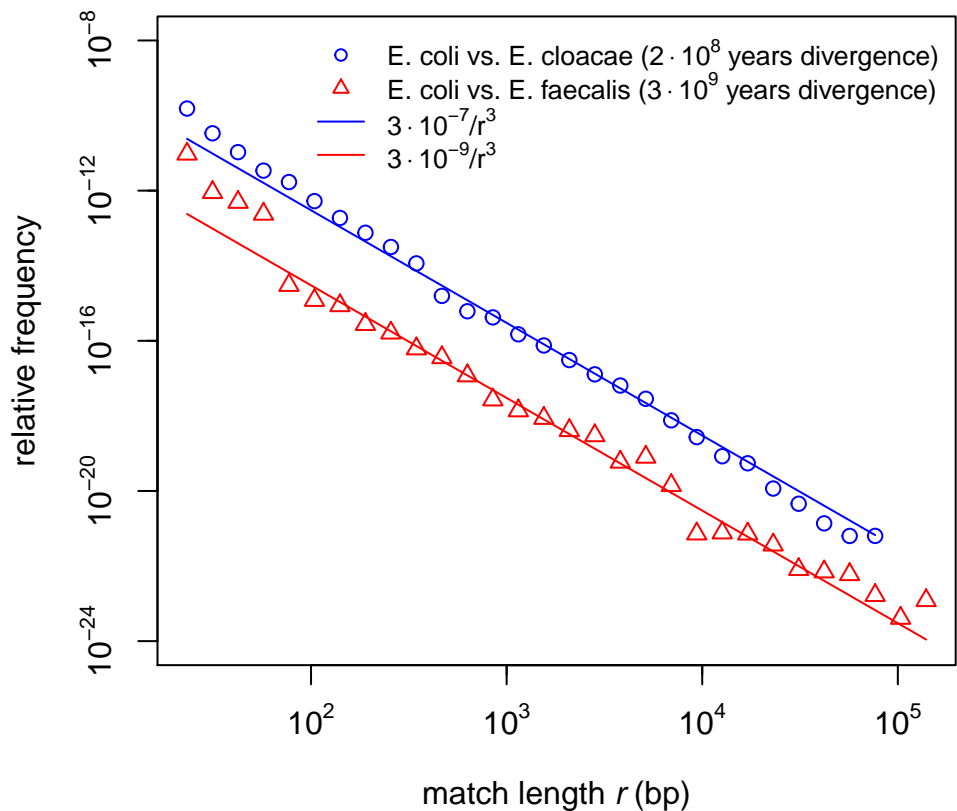

Supplement: supp [file elife-62719-supp-v1.zip]

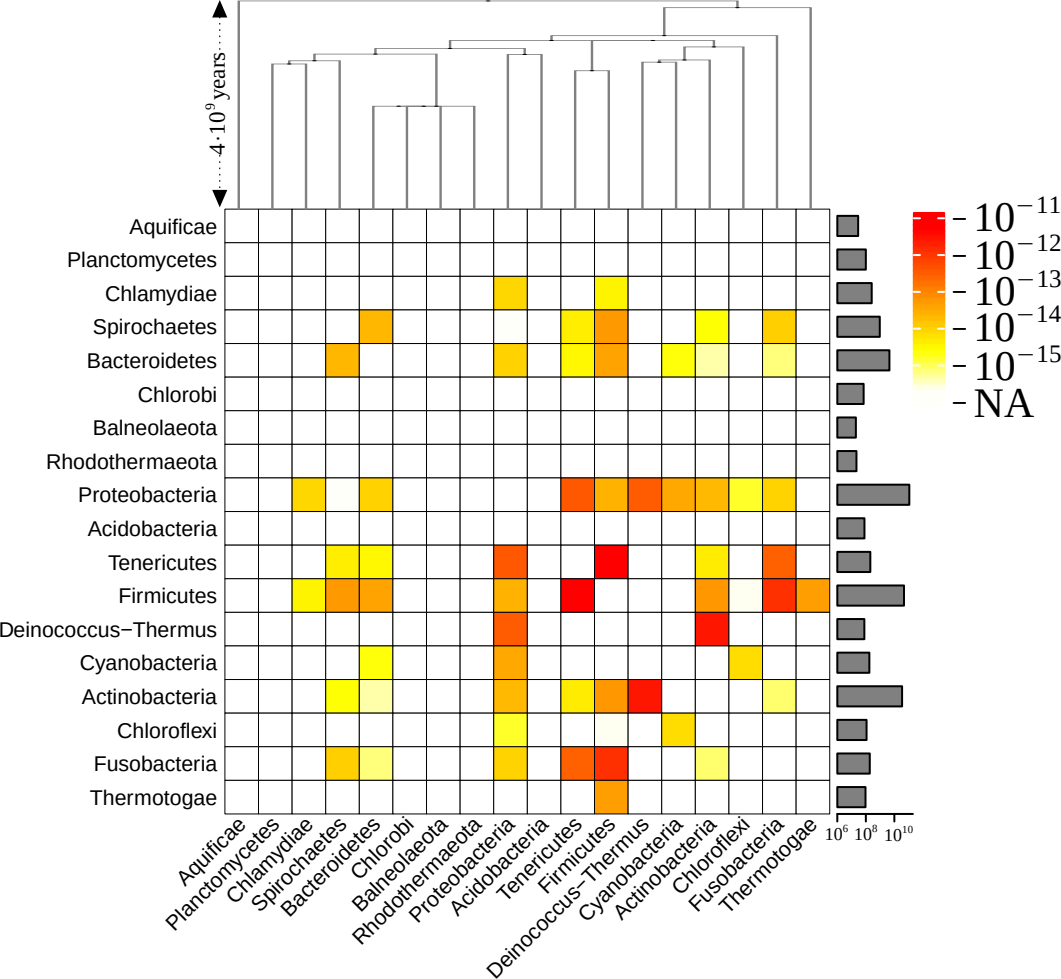

Supplement: supp [file elife-62719-supp-v1.zip]

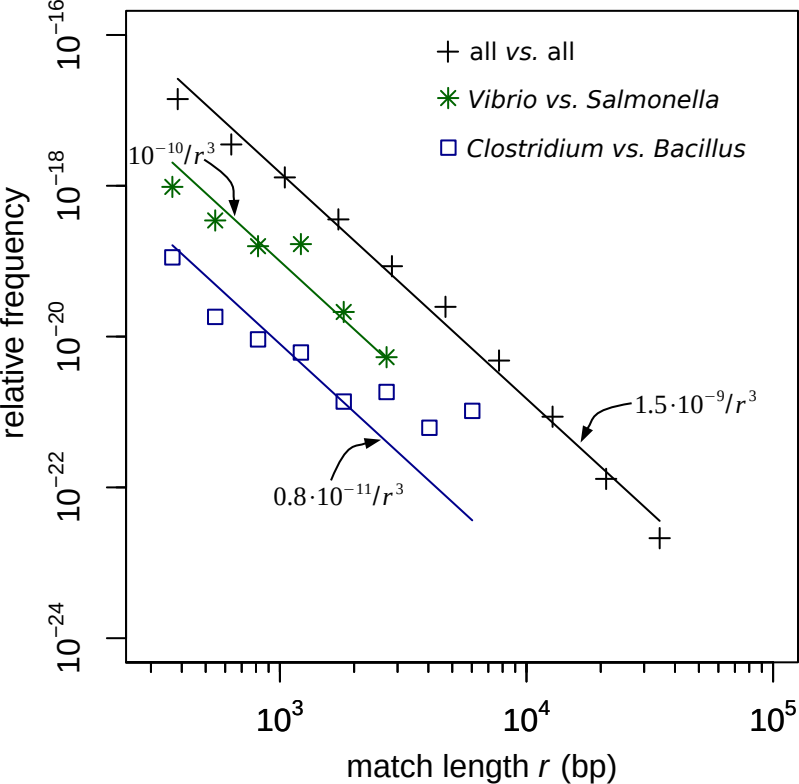

Supplement: supp [file elife-62719-supp-v1.zip]
